# Supplementary material for: Syntheses of difluorinated carbasugar phosphates from trifluoroethanol
Source: Royal Society of Chemistry journal article supplement (doi:10.1039/b914068a), 2009-01-01

# Syntheses of Difluorinated Carbasugar Phosphates from Trifluoroethanol

Timo Anderl,<sup>a</sup> Christophe Audouard,<sup>a</sup> Afjal Miah,<sup>a</sup> Jonathan M. Percy,<sup>\*b</sup> Giuseppe Rinaudo,<sup>b</sup> Kuldip Singh<sup>a</sup>

<sup>a</sup>Department of Chemistry, University of Leicester, University Road, Leicester LE1 7RH, UK,

<sup>b</sup>WestCHEM, Department of Pure and Applied Chemistry, Thomas Graham Building, 295 Cathedral Street, Glasgow G1 1XL, UK, Fax: +44 141 4822; Tel: +44 141 548 4398; E-mail: jonathan.percy@strath.ac.uk

## Table of contents

|                                                                    |        |
|--------------------------------------------------------------------|--------|
| Characterisation spectra for <b>9, 11, 12, 19, 20, 21, 24, 25.</b> | S2-S68 |
|--------------------------------------------------------------------|--------|

**9**  
<sup>1</sup>H NMR  
300 MHz, CDCl<sub>3</sub>

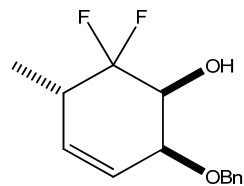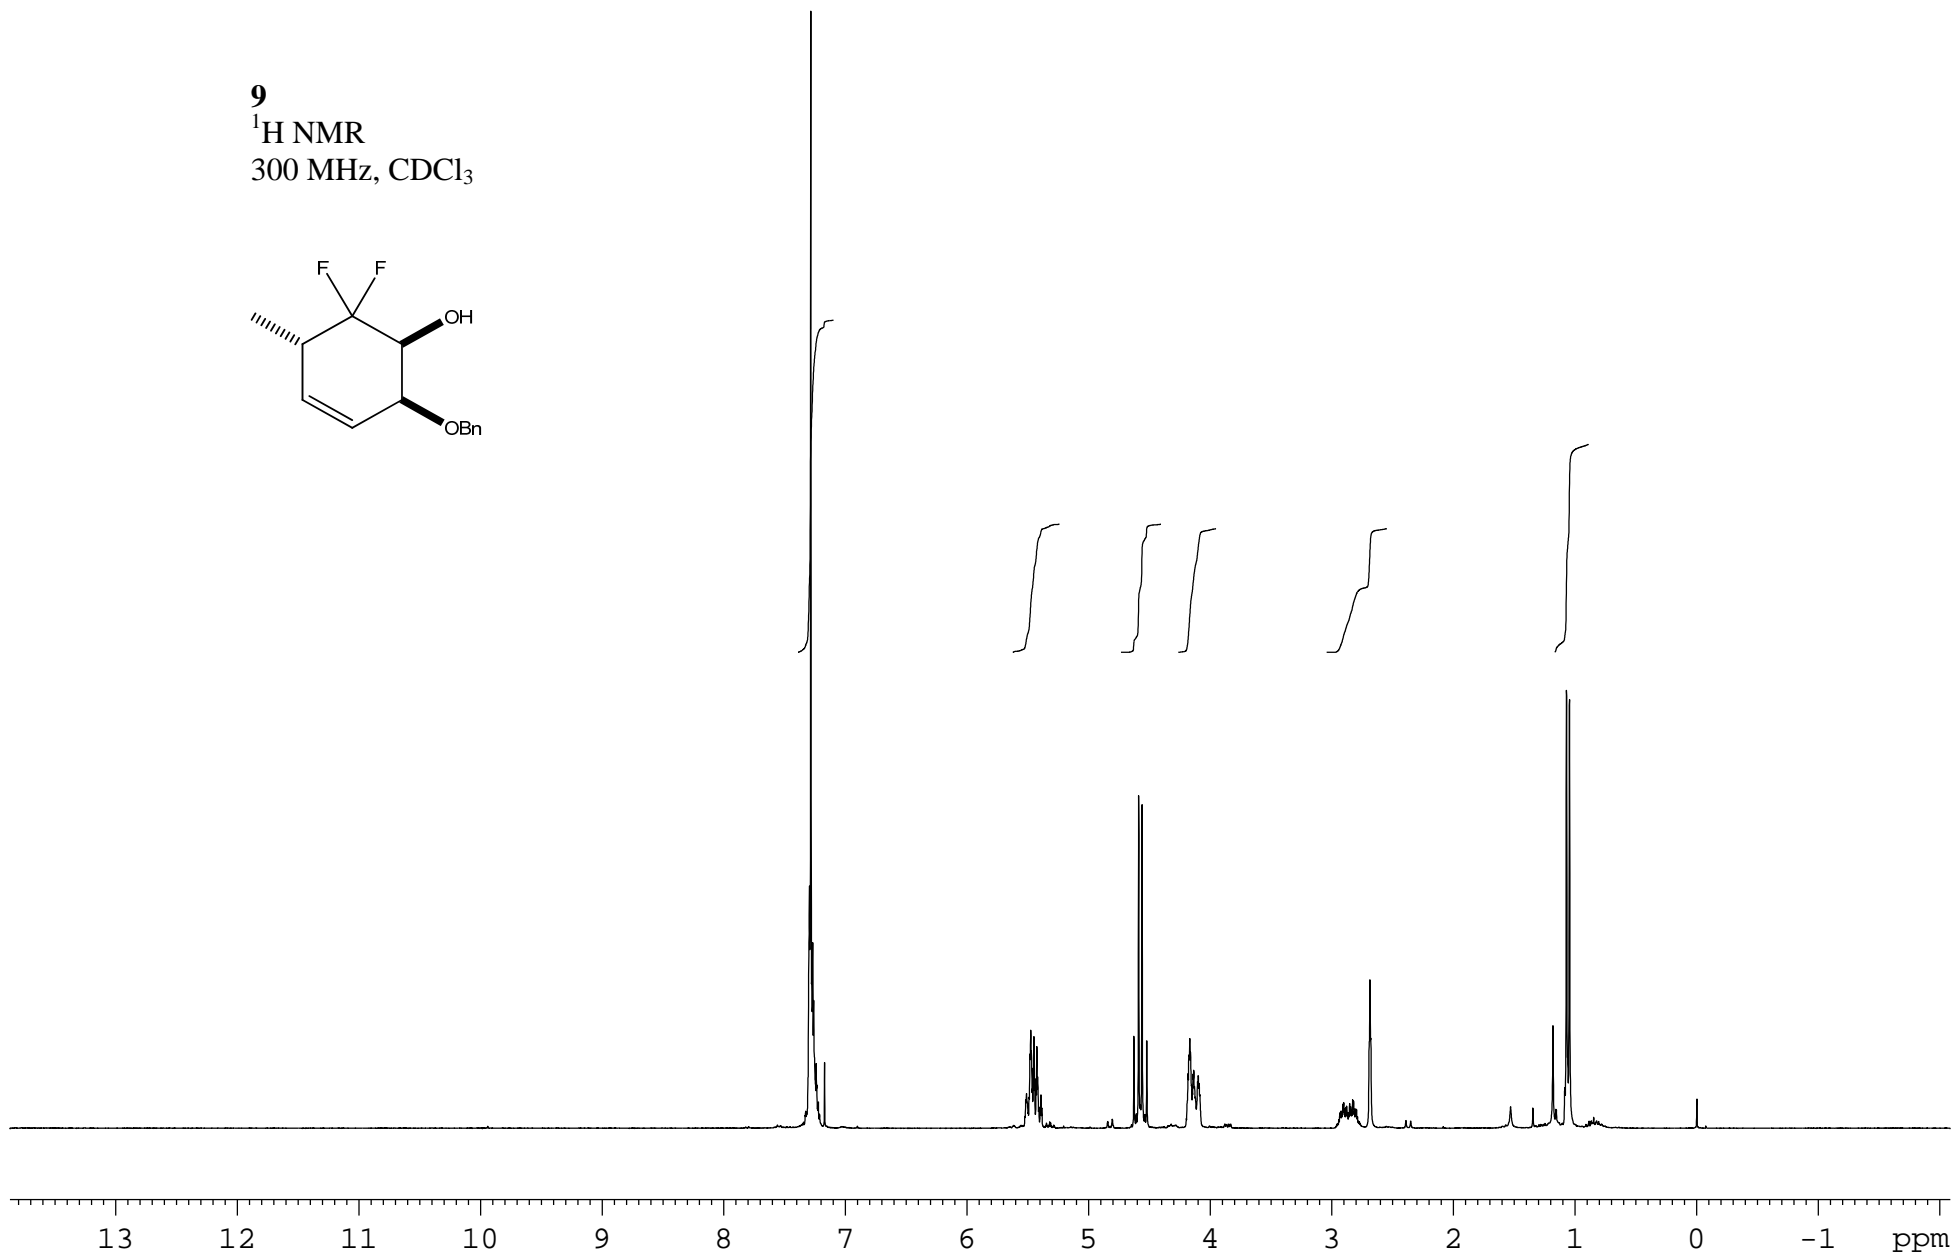

**9**  
Partial  $^1\text{H}$  NMR  
300 MHz,  $\text{CDCl}_3$

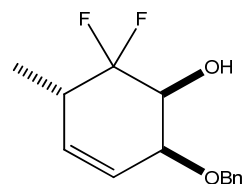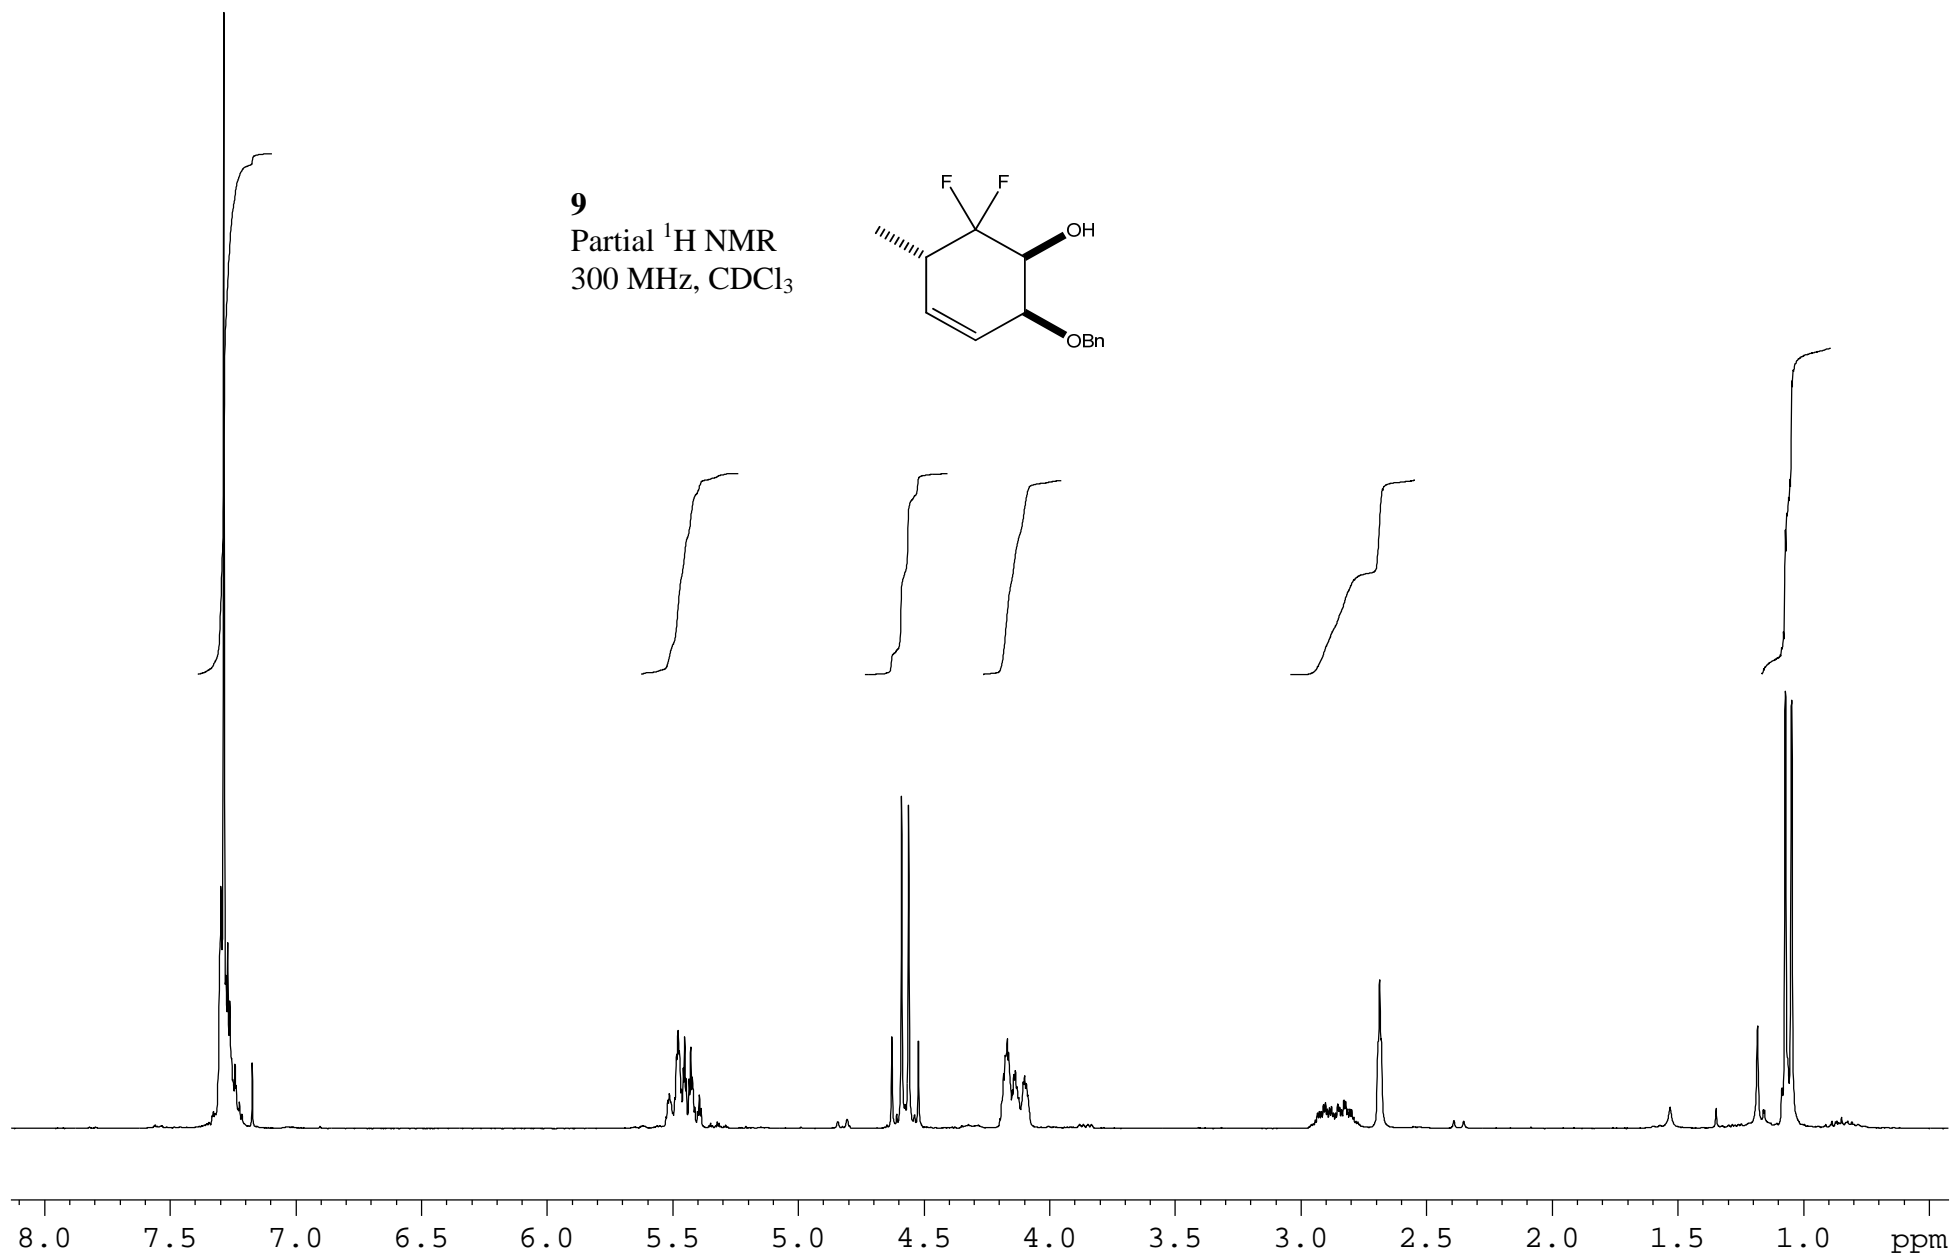

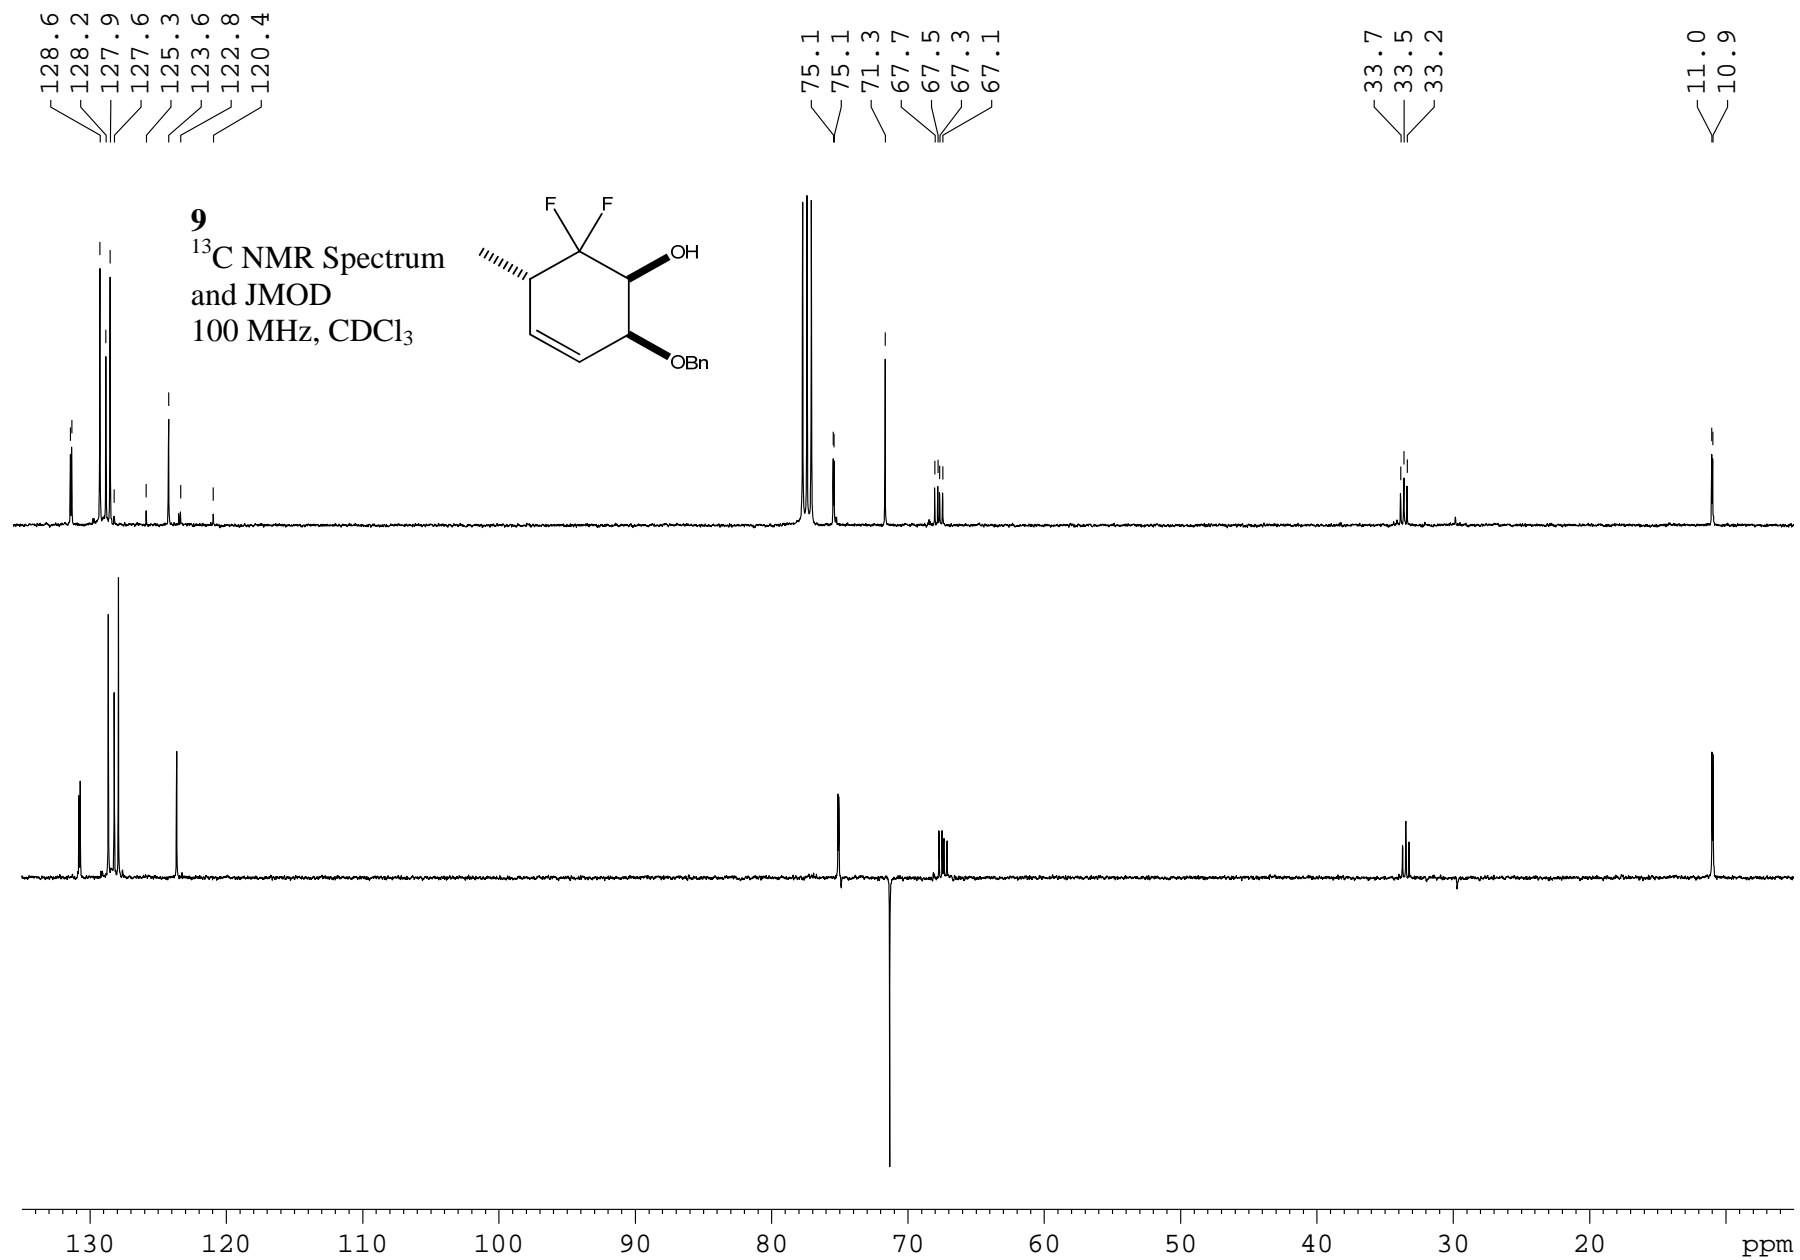

**9**  
<sup>19</sup>F NMR  
282 MHz, CDCl<sub>3</sub>  
Small peaks arise from **10**

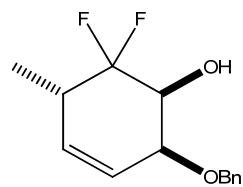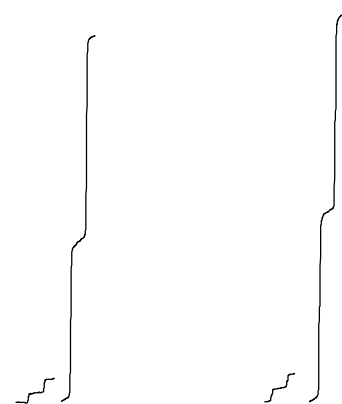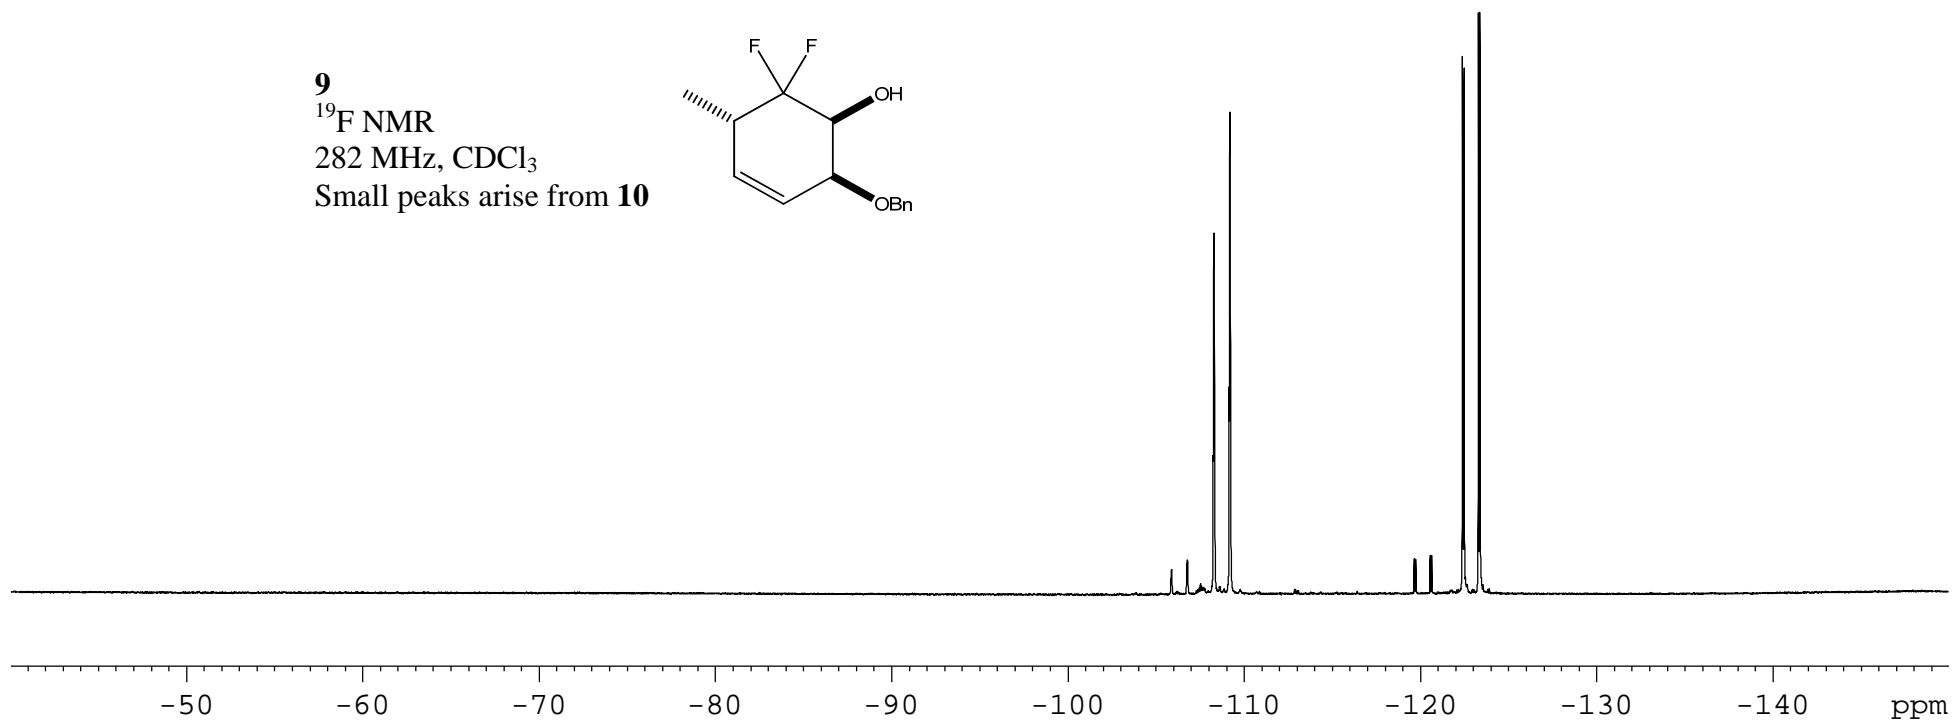

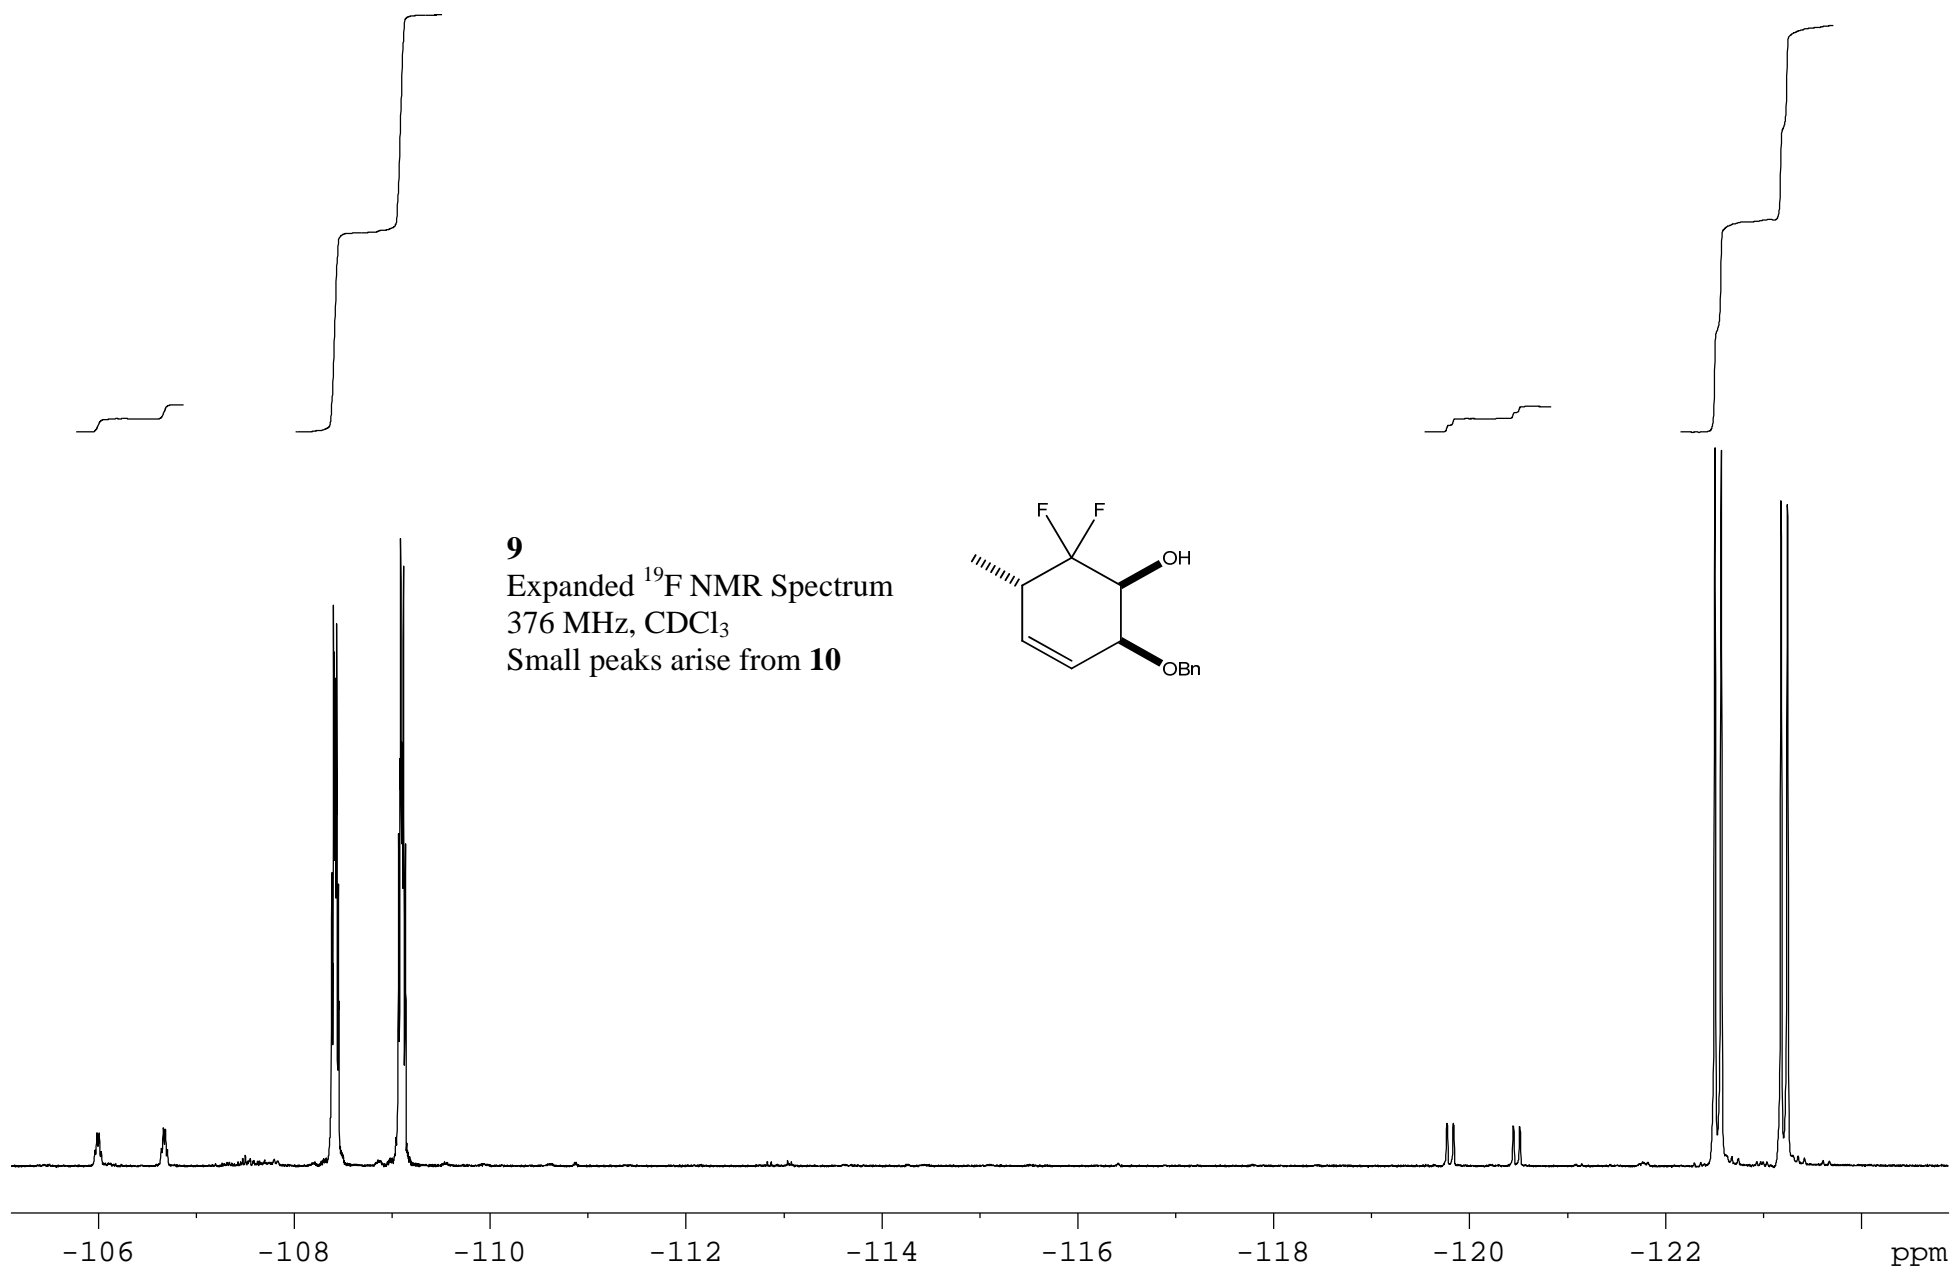

**11**  
<sup>1</sup>H NMR Spectrum  
300 MHz, CDCl<sub>3</sub>

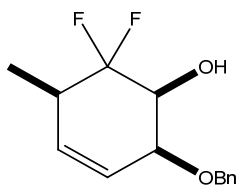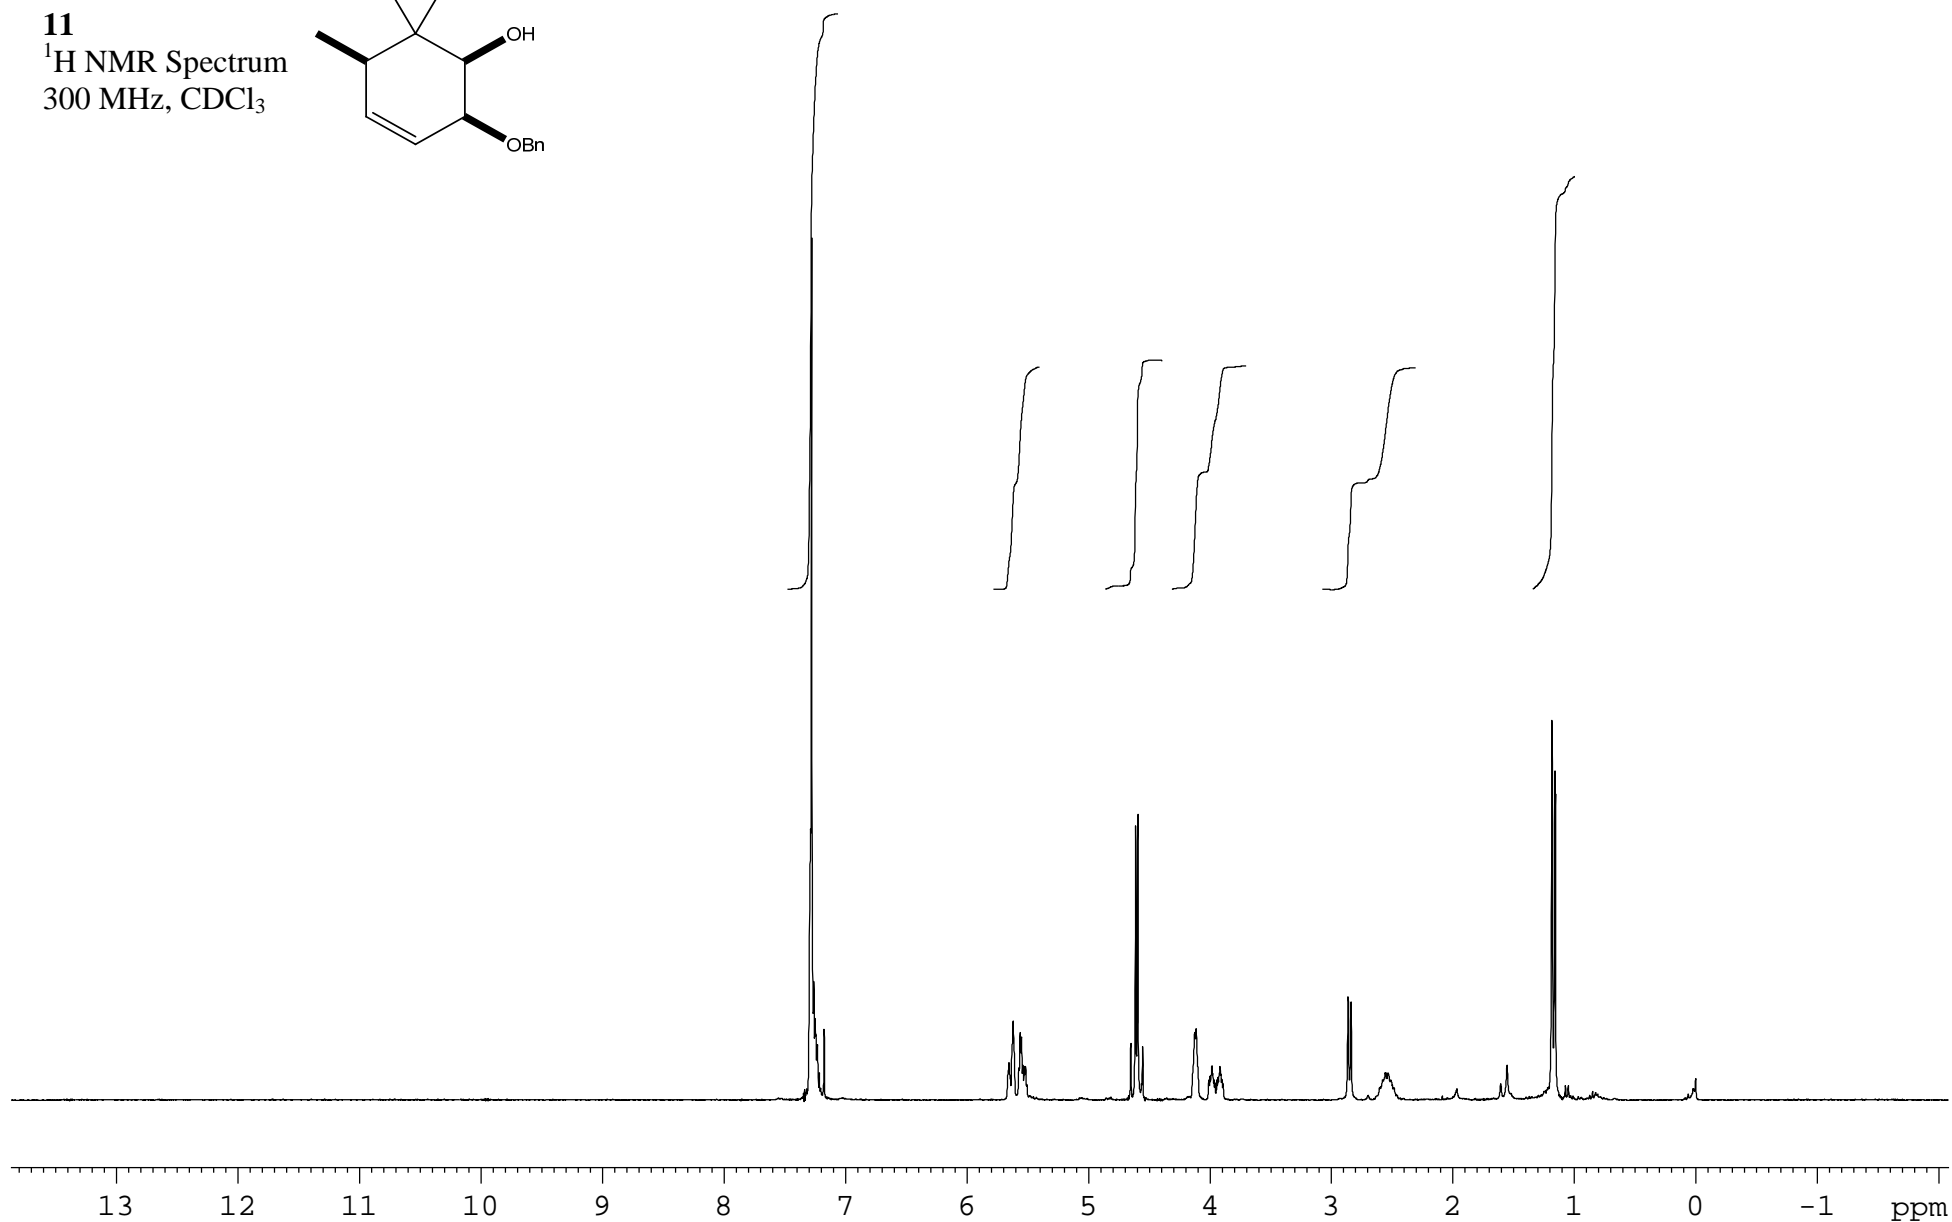

**11**  
Partial  $^1\text{H}$  NMR  
Spectrum  
300 MHz,  $\text{CDCl}_3$

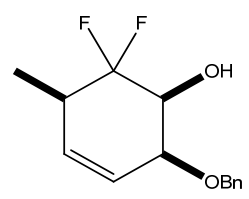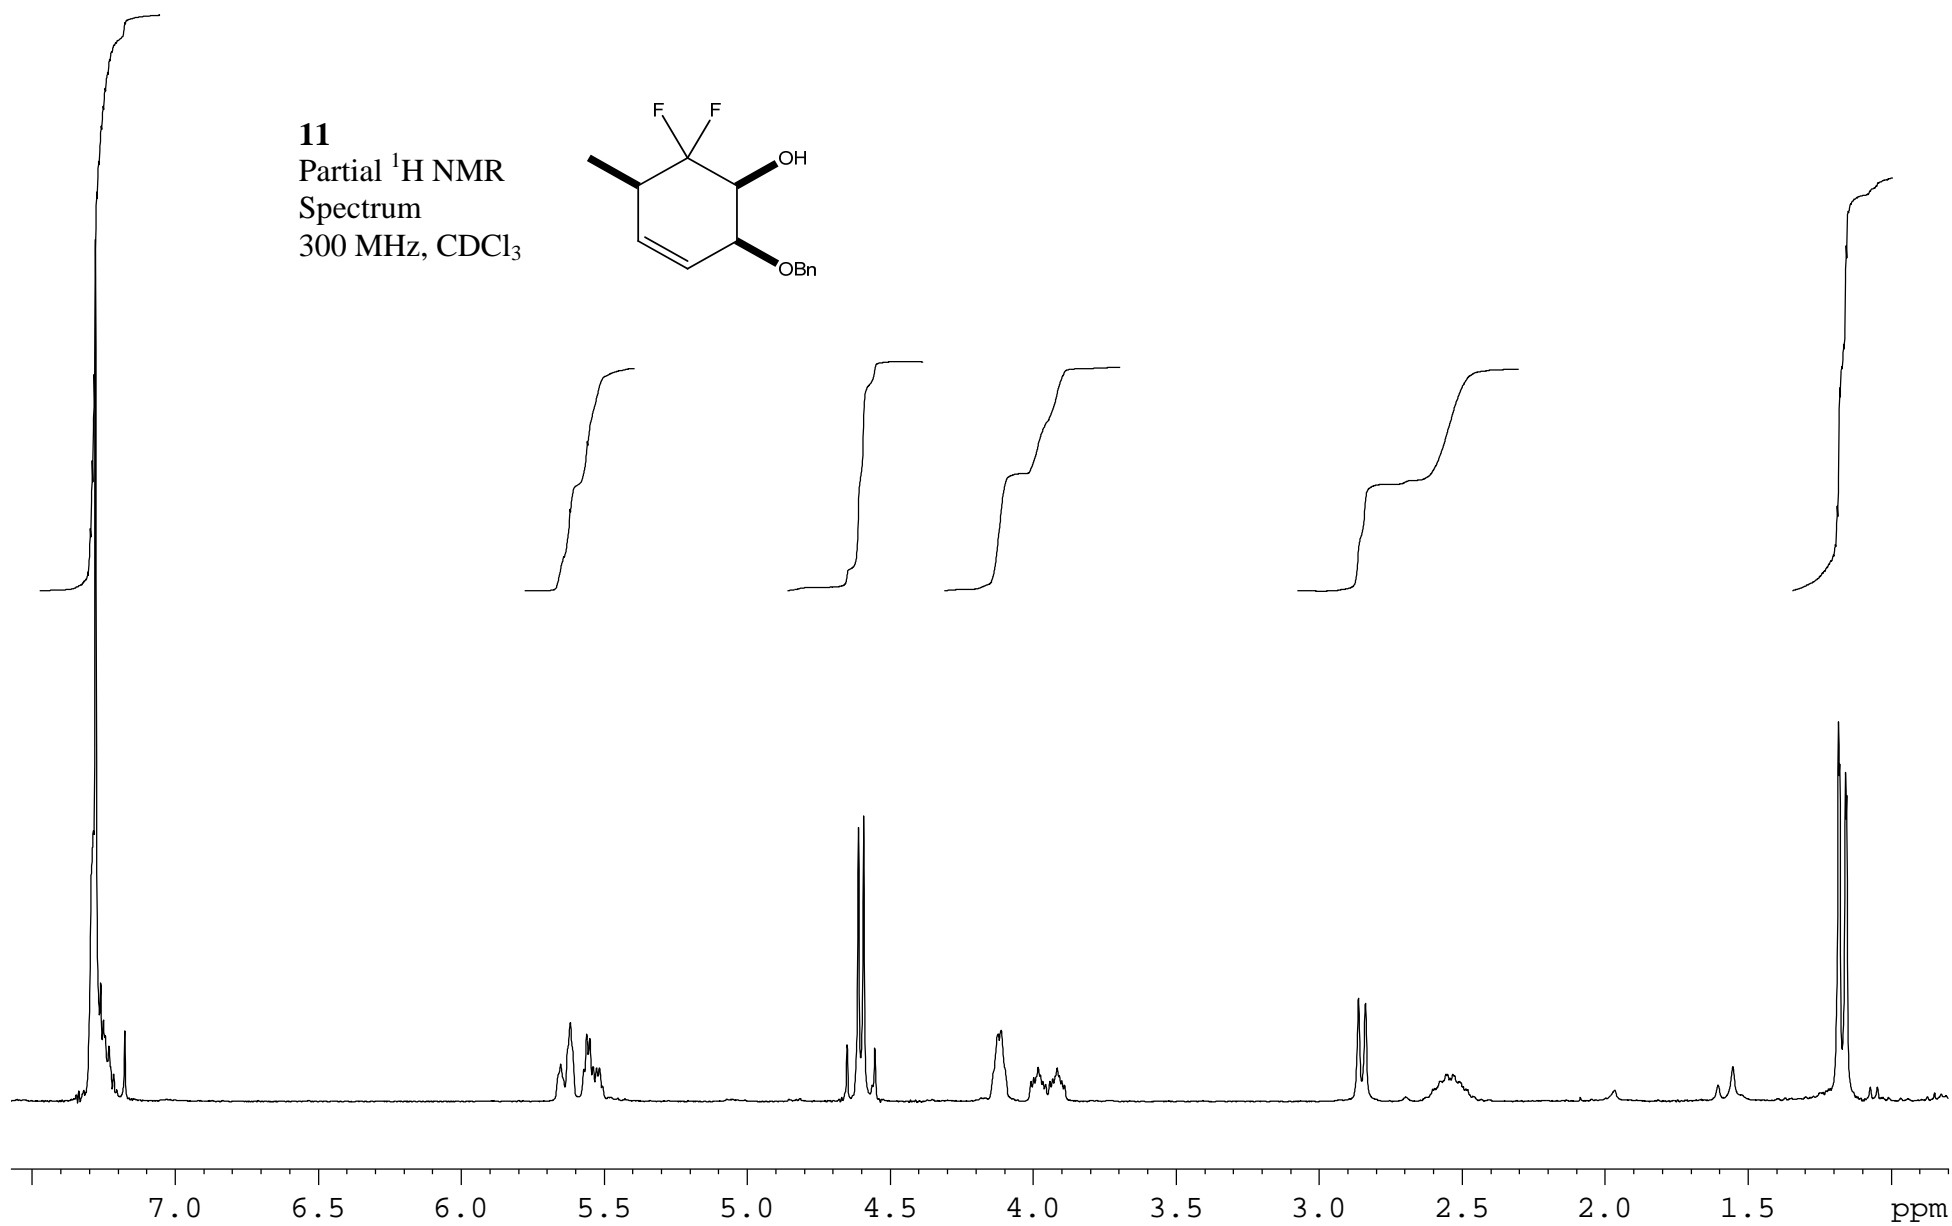





**11**  
<sup>13</sup>C NMR Spectrum  
100 MHz, CDCl<sub>3</sub>

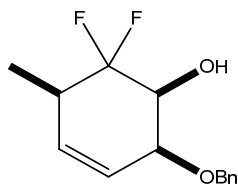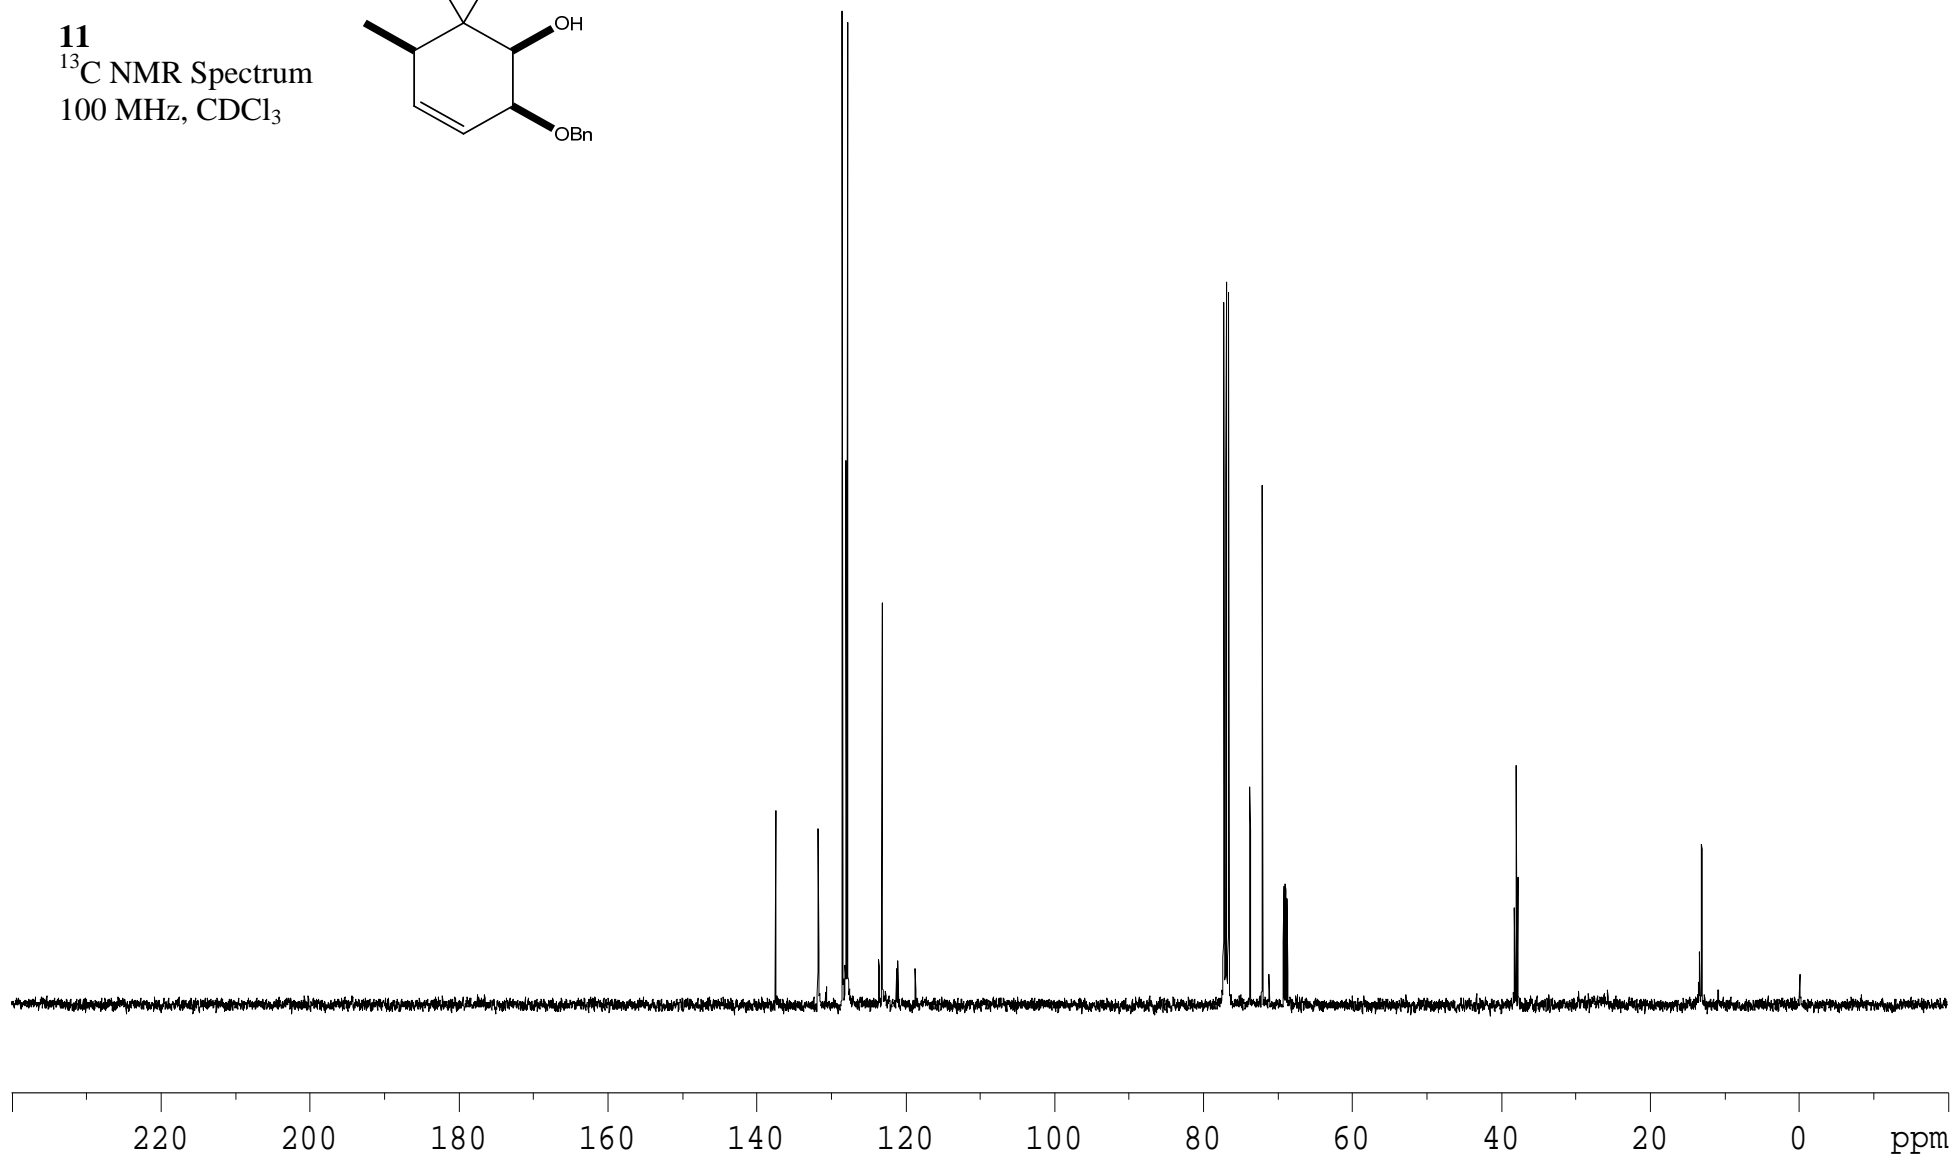

**11**  
Expanded  $^{13}\text{C}$  NMR Spectrum  
100 MHz,  $\text{CDCl}_3$

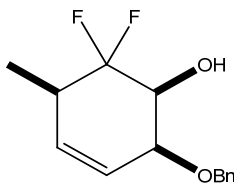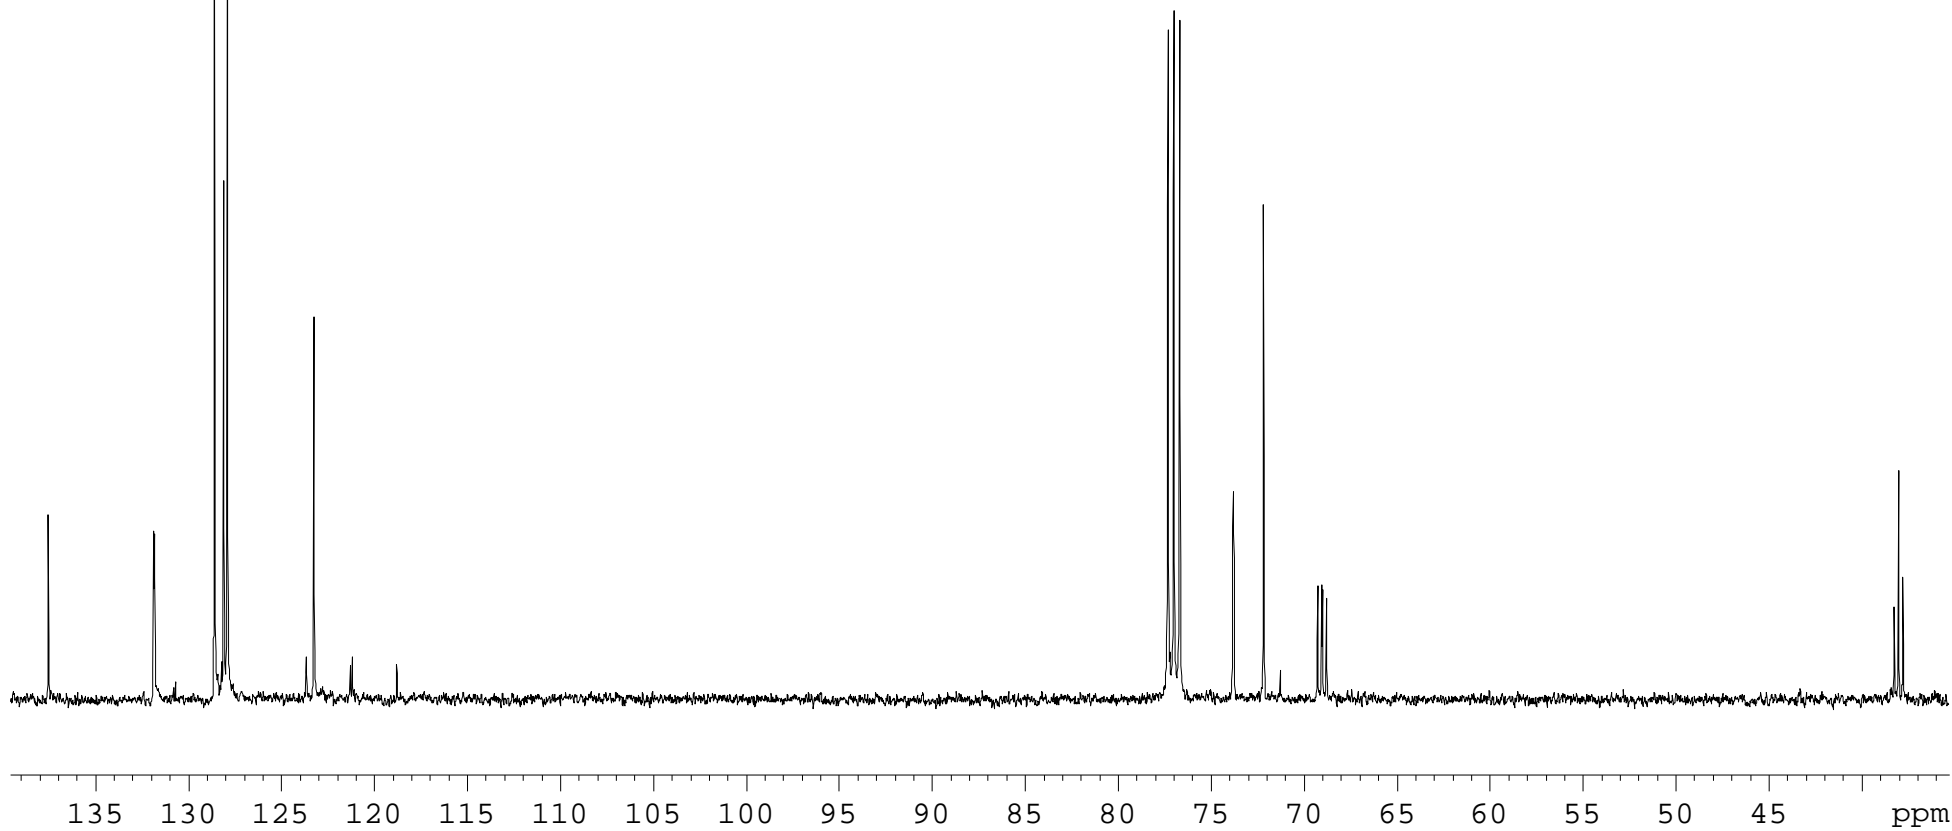

$^{19}\text{F}$  NMR Spectrum  
282 MHz,  $\text{CDCl}_3$

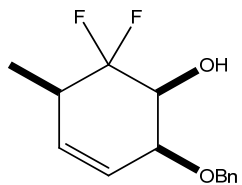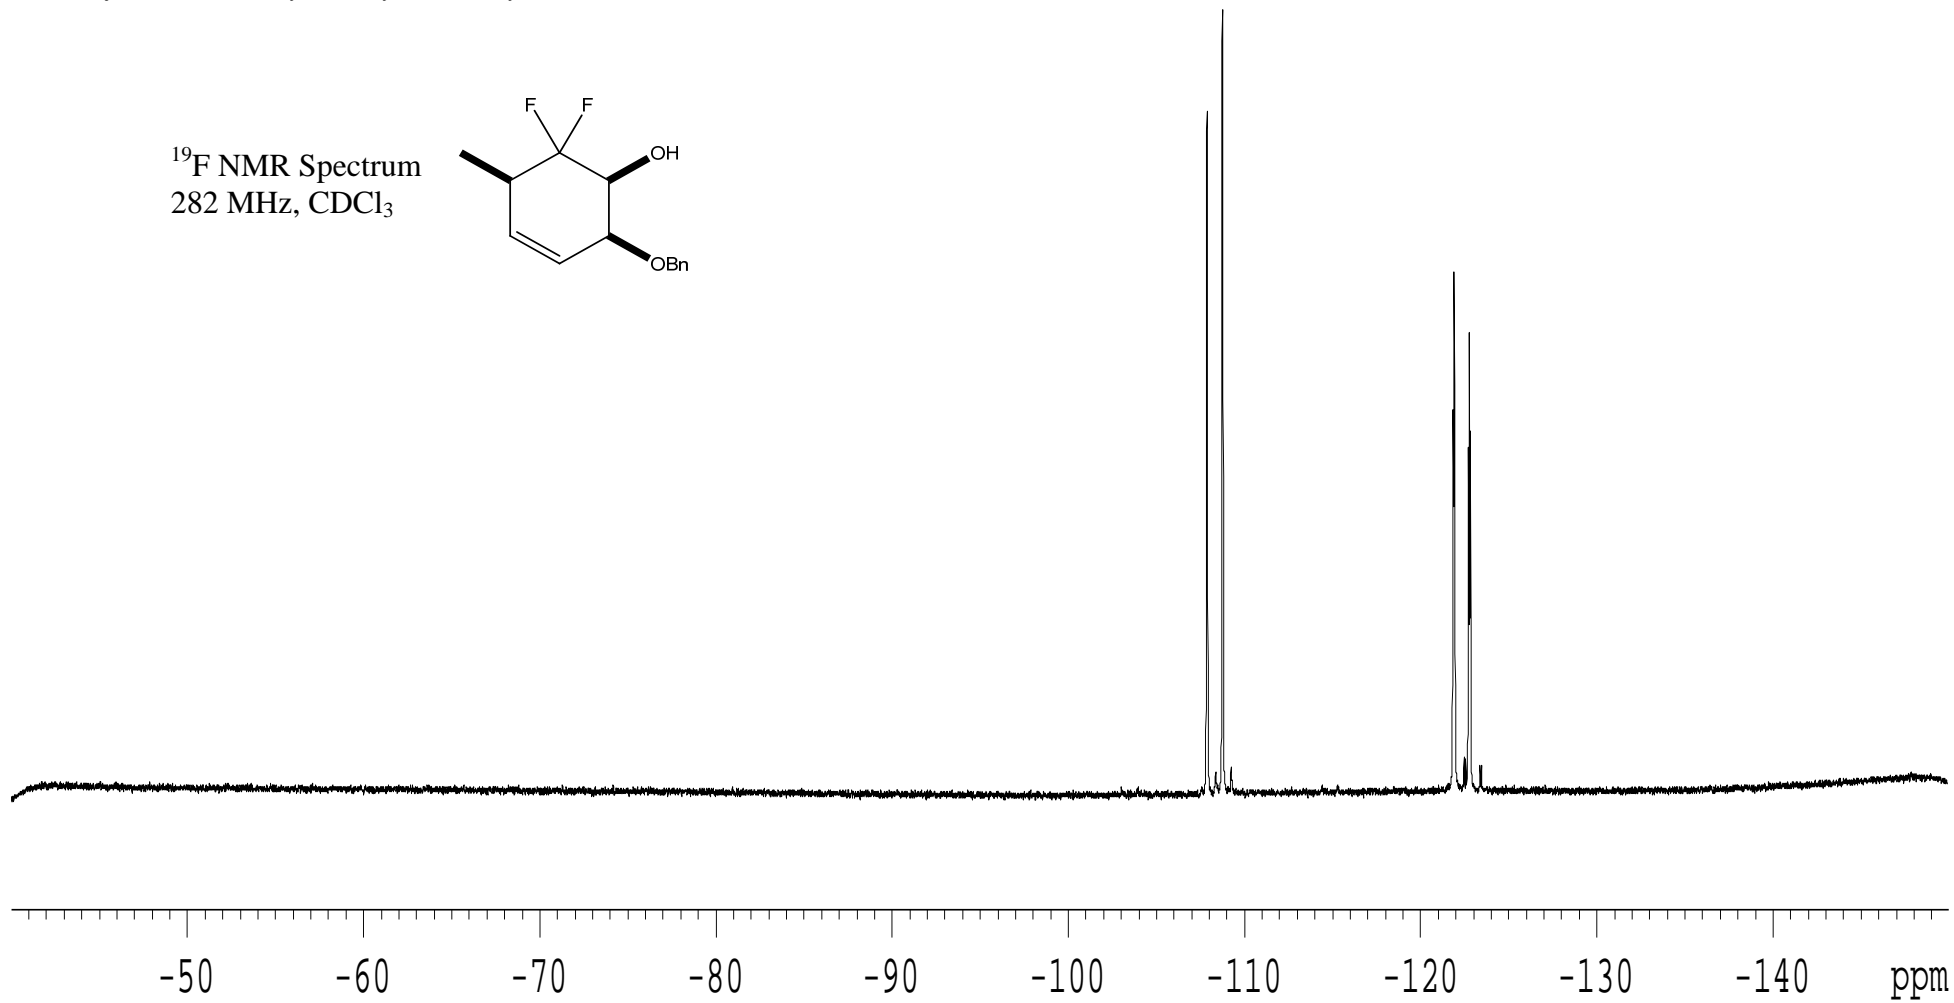

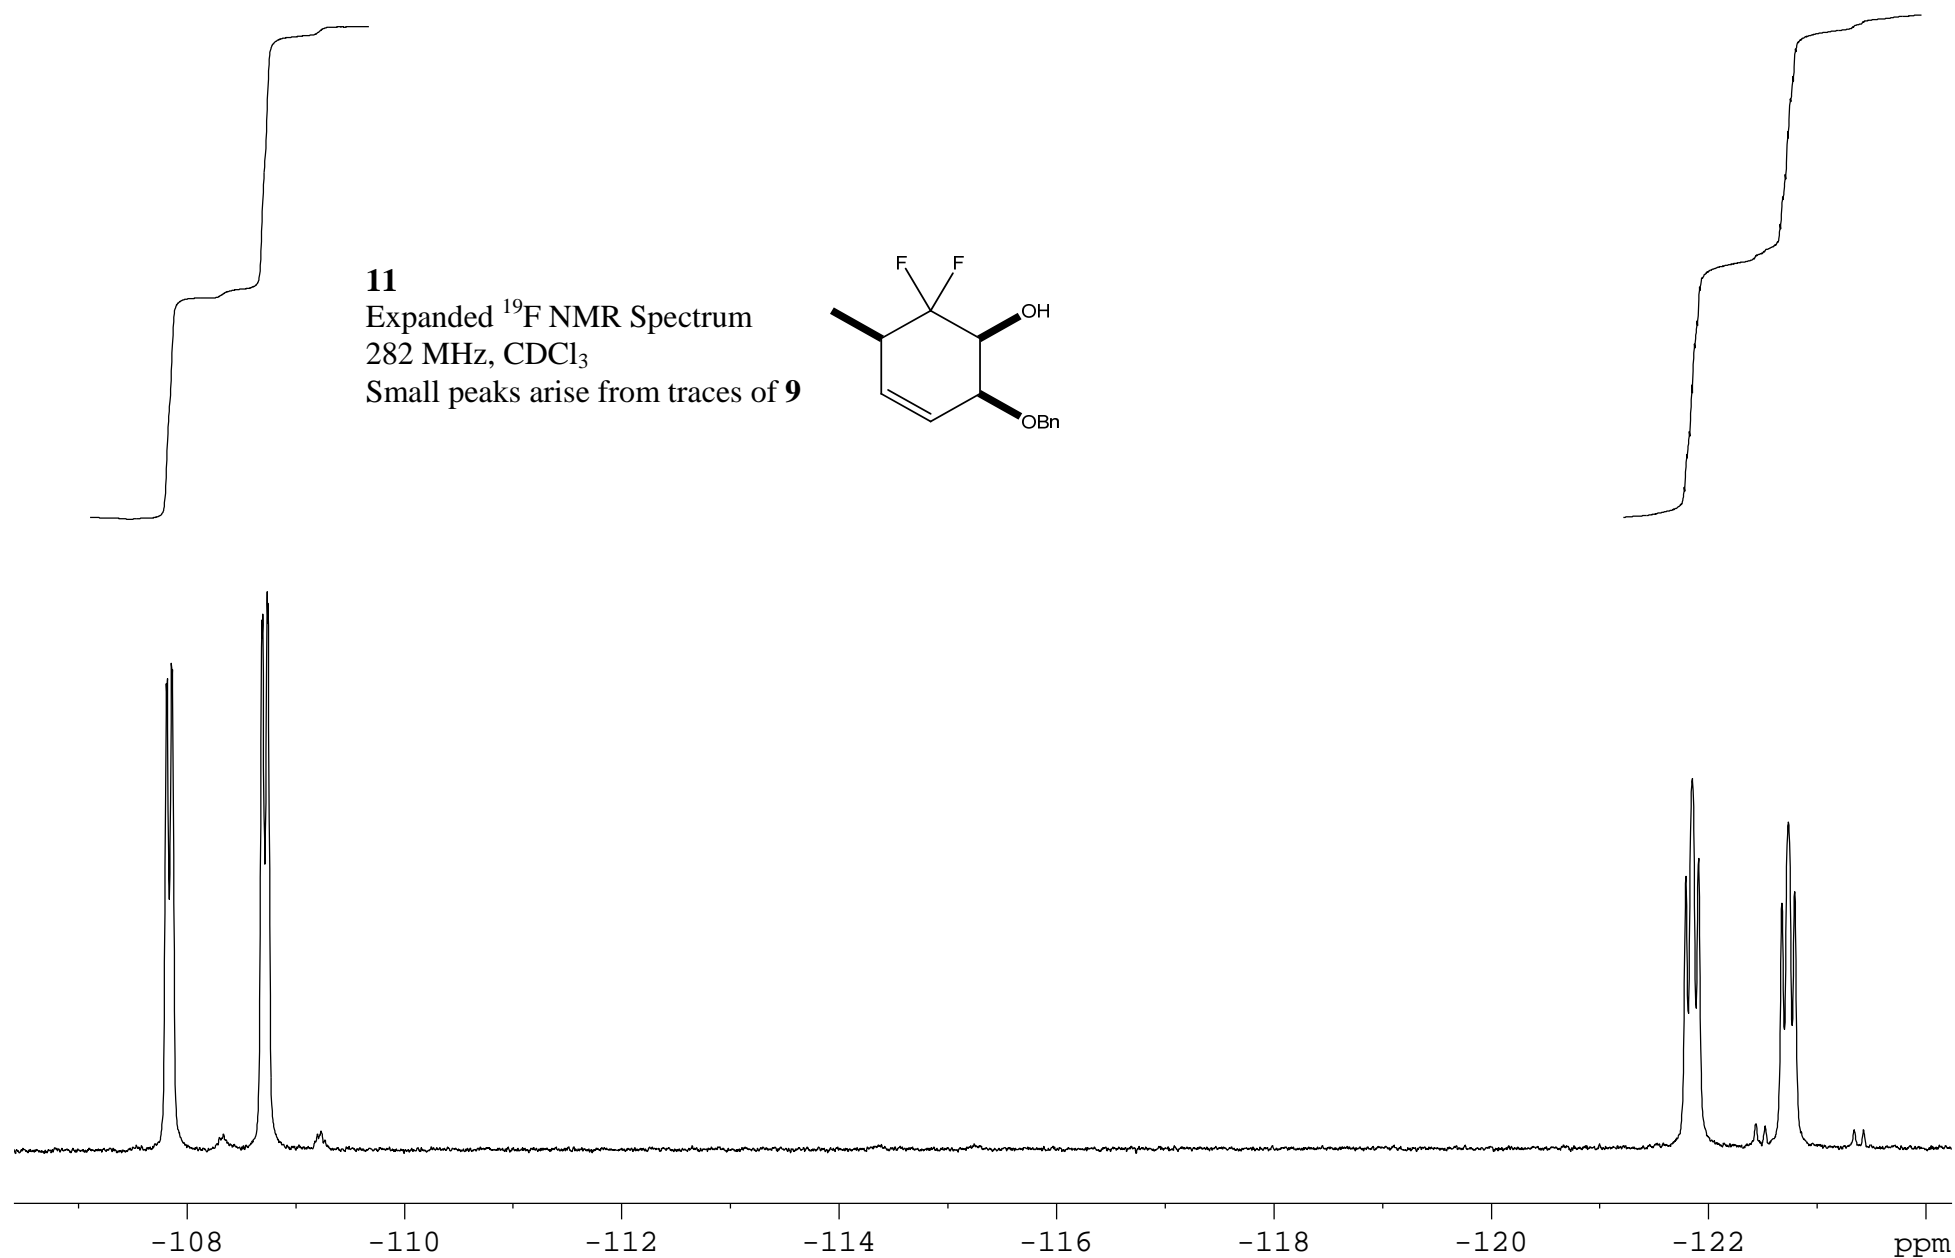



**12**  
<sup>1</sup>H NMR Spectrum  
300 MHz, CDCl<sub>3</sub>

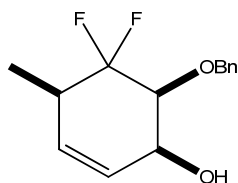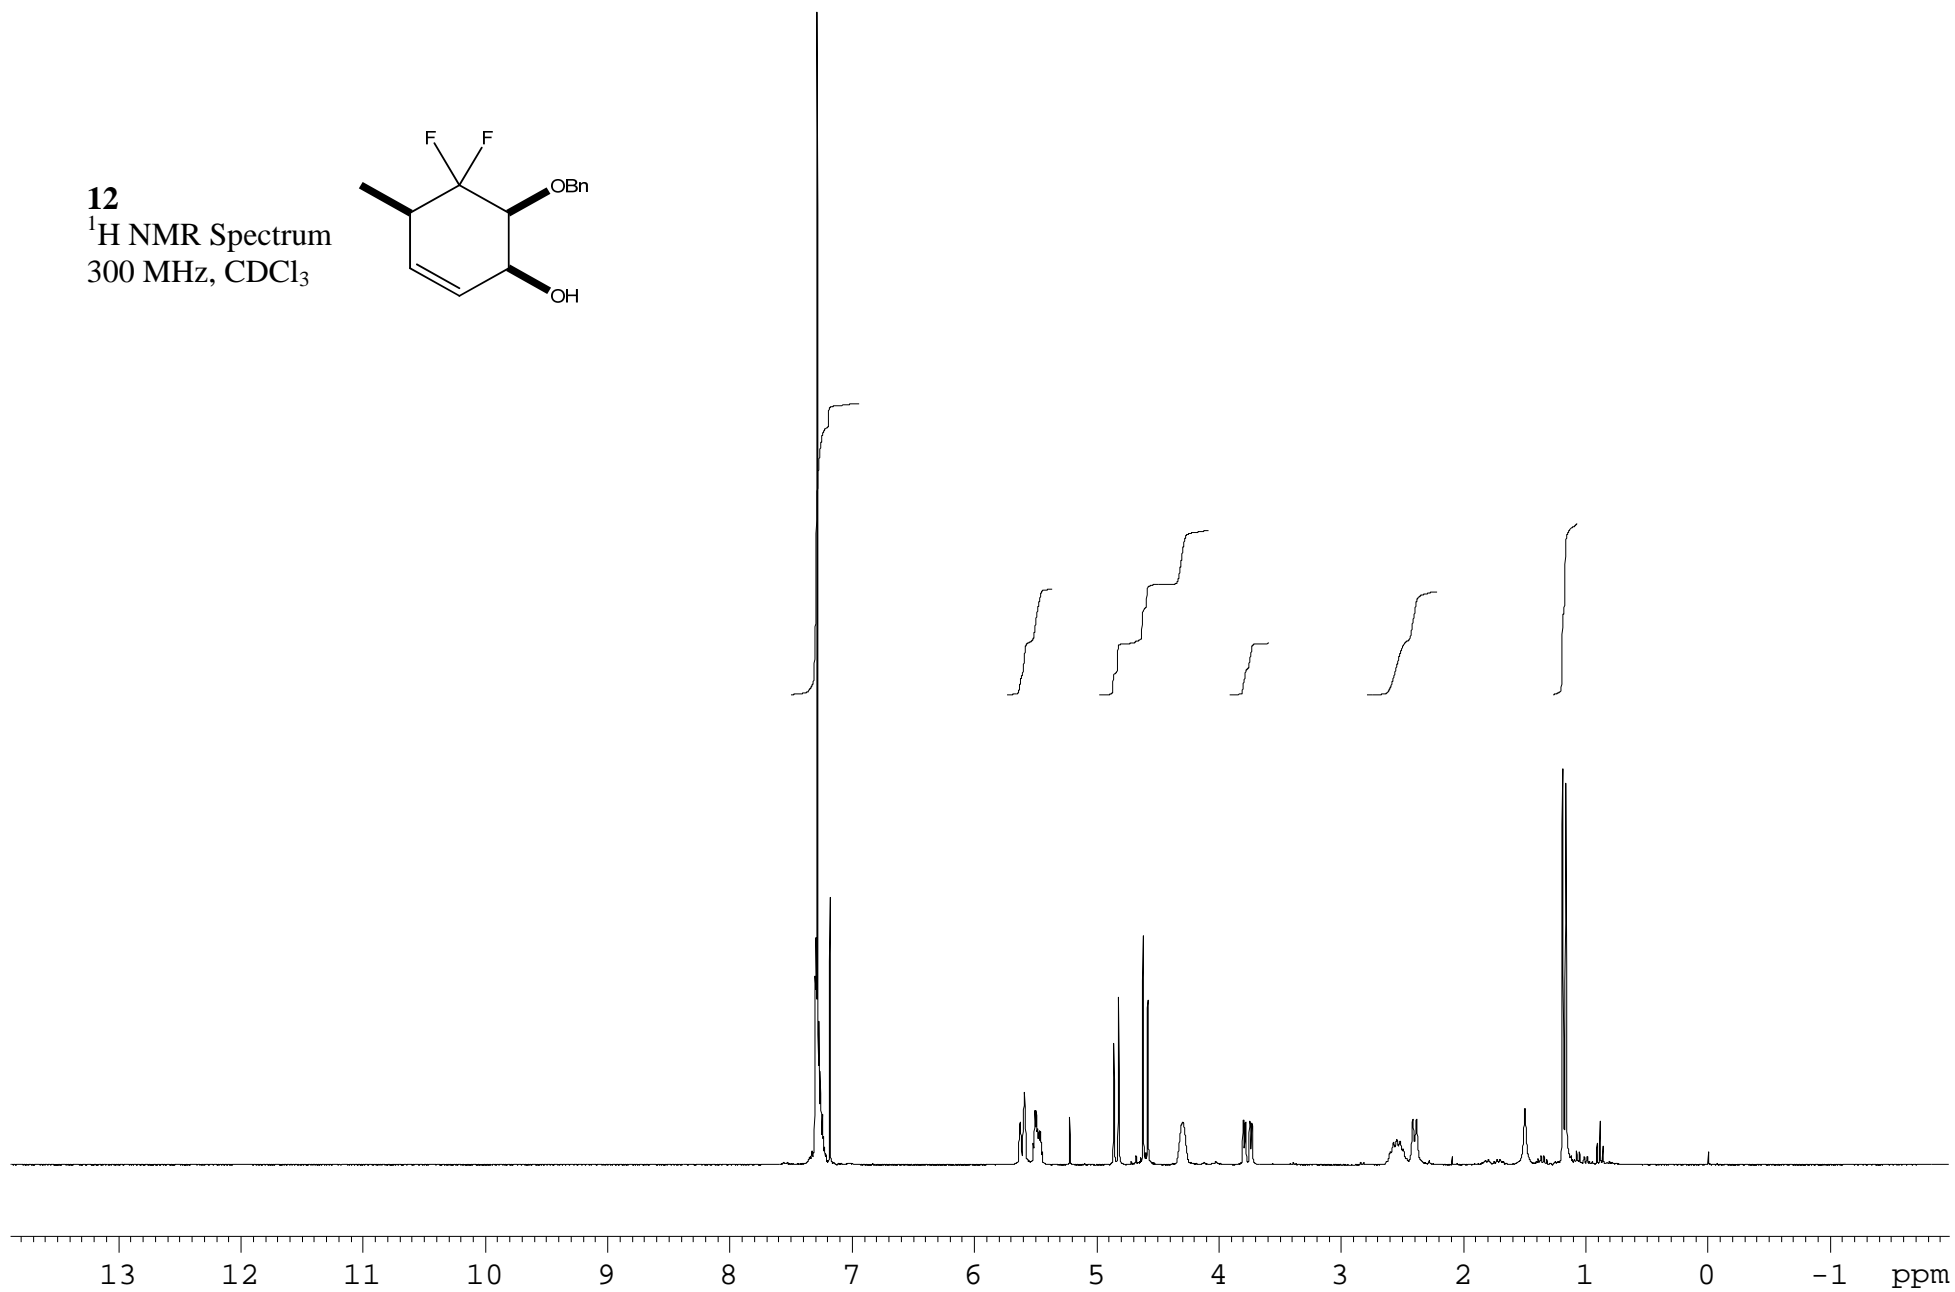





**12**  
Partial  $^1\text{H}$  NMR Spectrum  
300 MHz,  $\text{CDCl}_3$

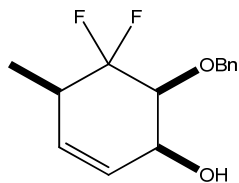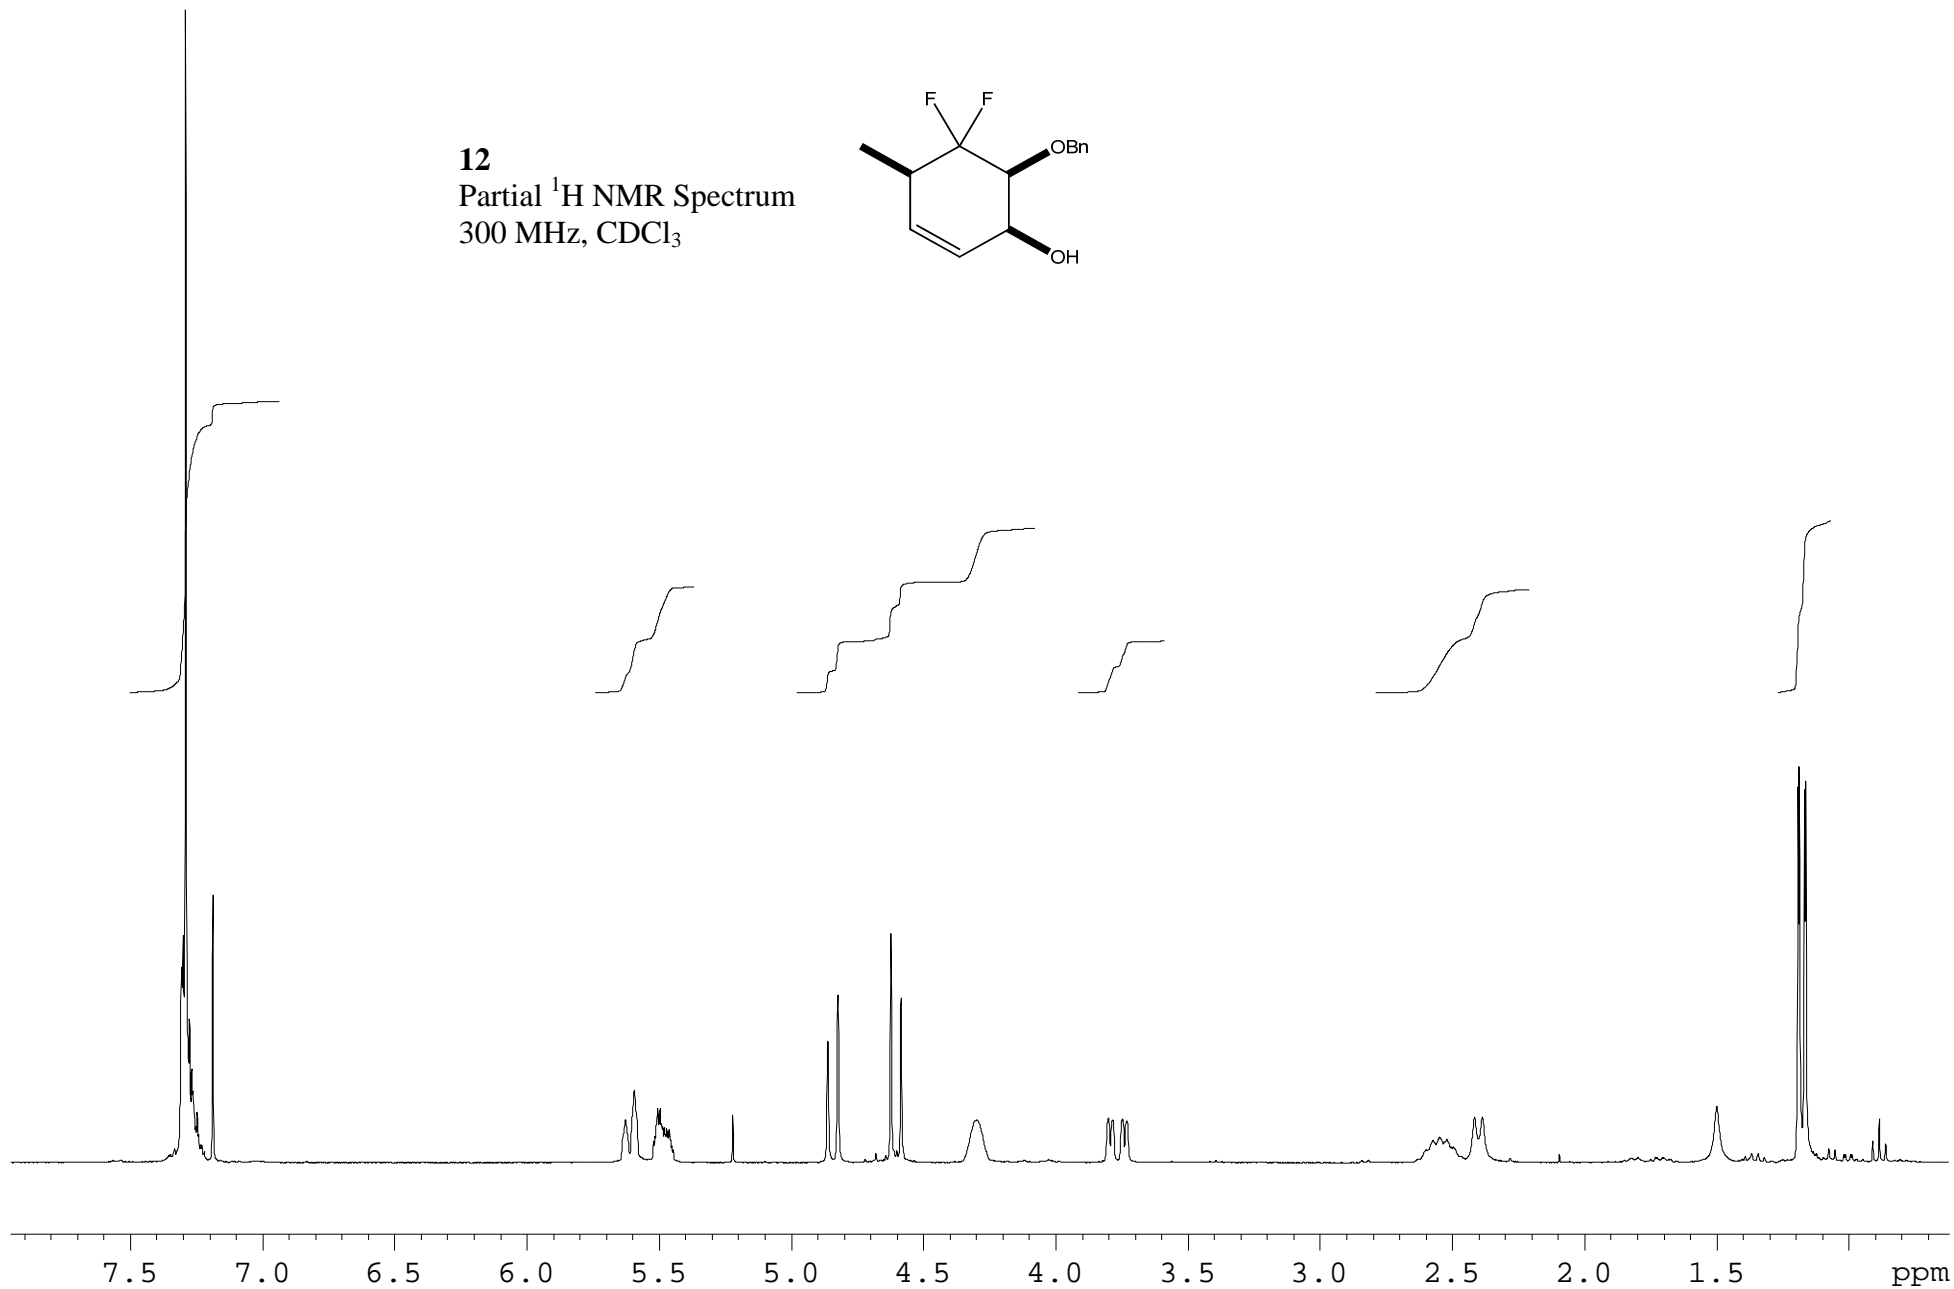

**12**  
<sup>13</sup>C NMR Spectrum  
100 MHz, CDCl<sub>3</sub>

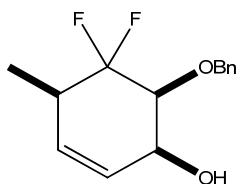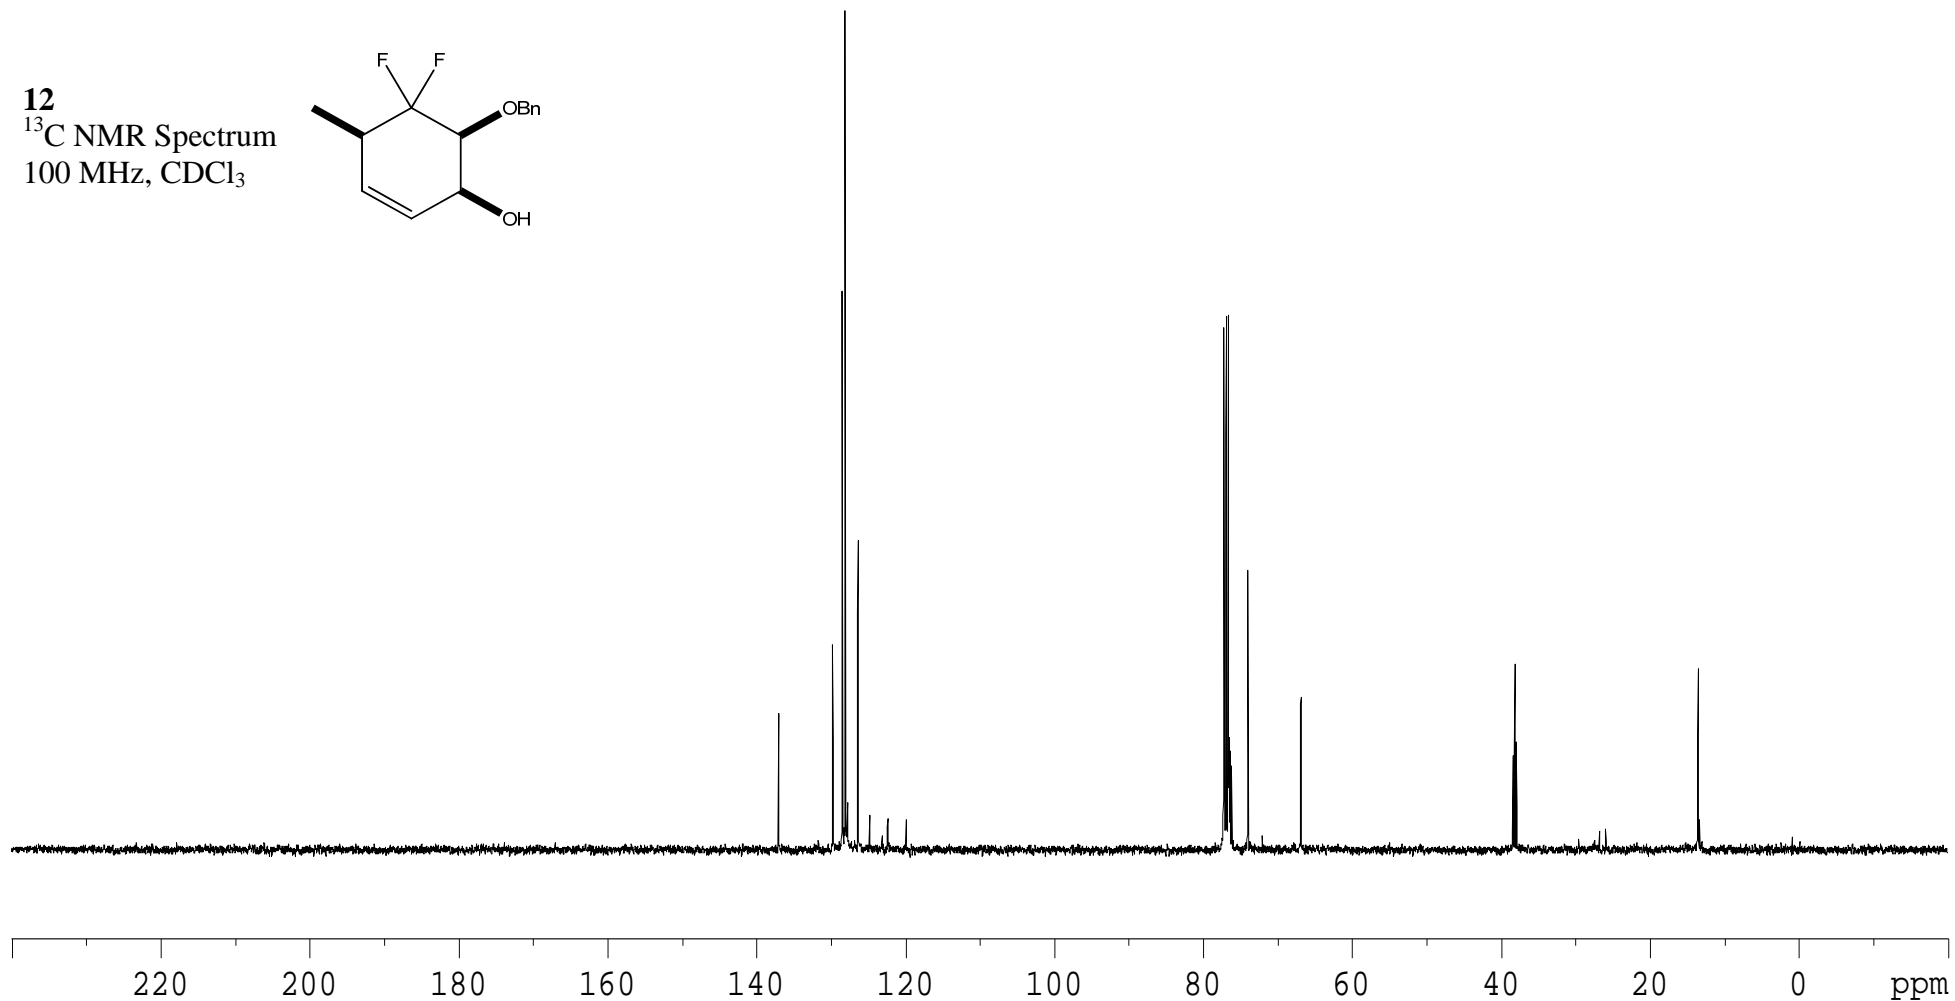

**12**  
Partial  $^{13}\text{C}$  NMR Spectrum  
100 MHz,  $\text{CDCl}_3$

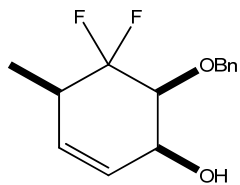

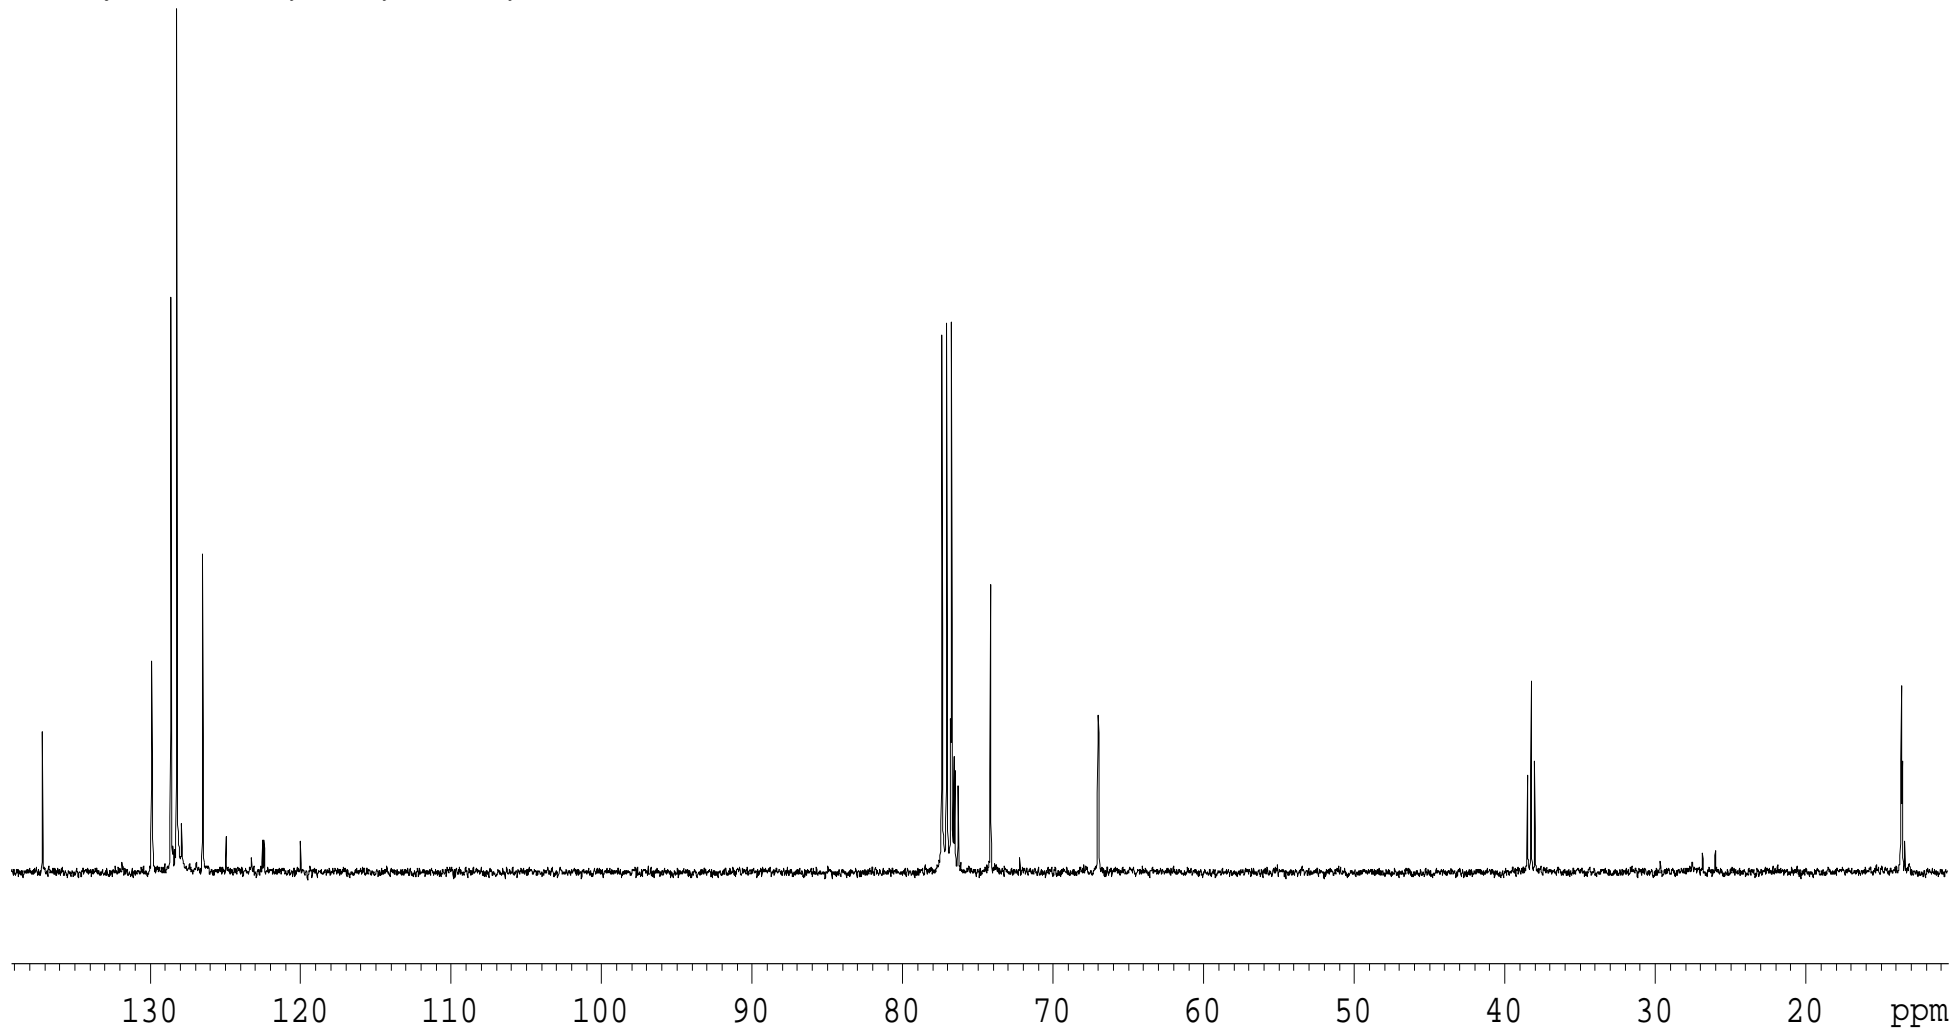

**12**  
<sup>19</sup>F NMR Spectrum  
282 MHz, CDCl<sub>3</sub>

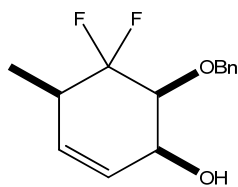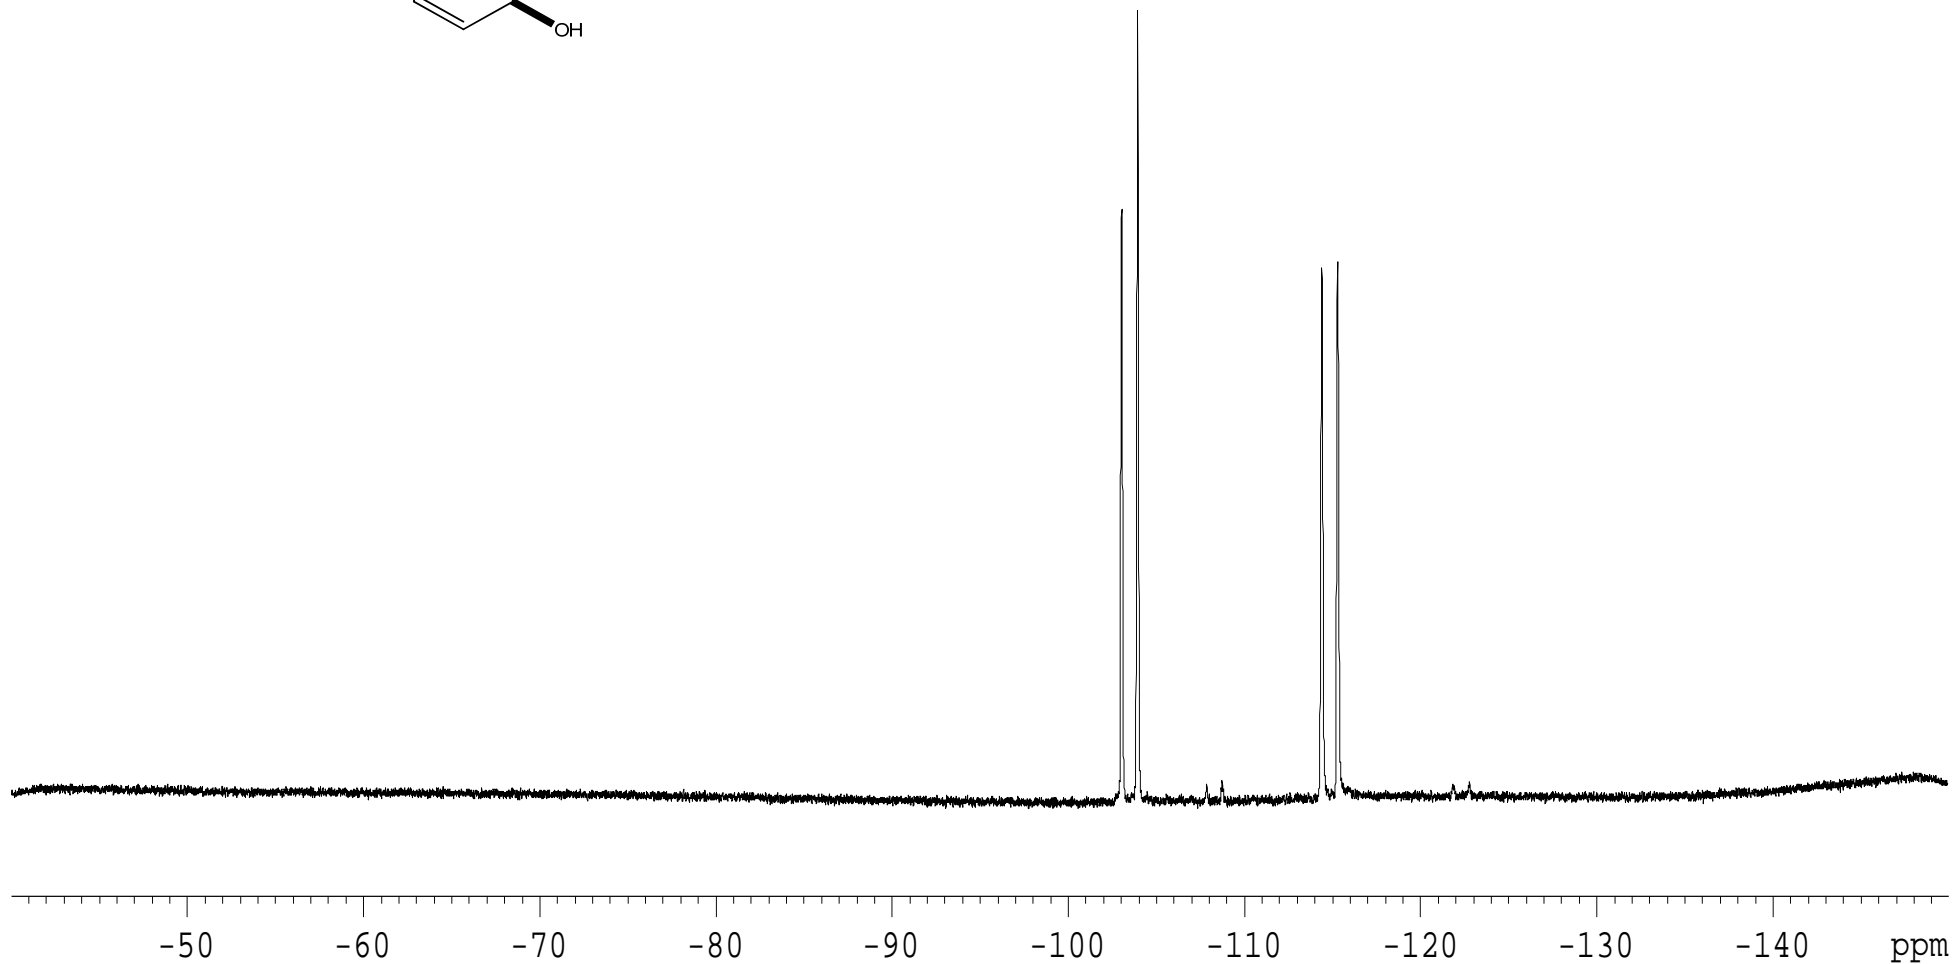

**12**  
Expanded  $^{19}\text{F}$  NMR Spectrum  
376 MHz,  $\text{CDCl}_3$   
Small peaks arise from traces of **11**

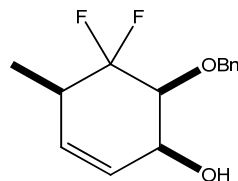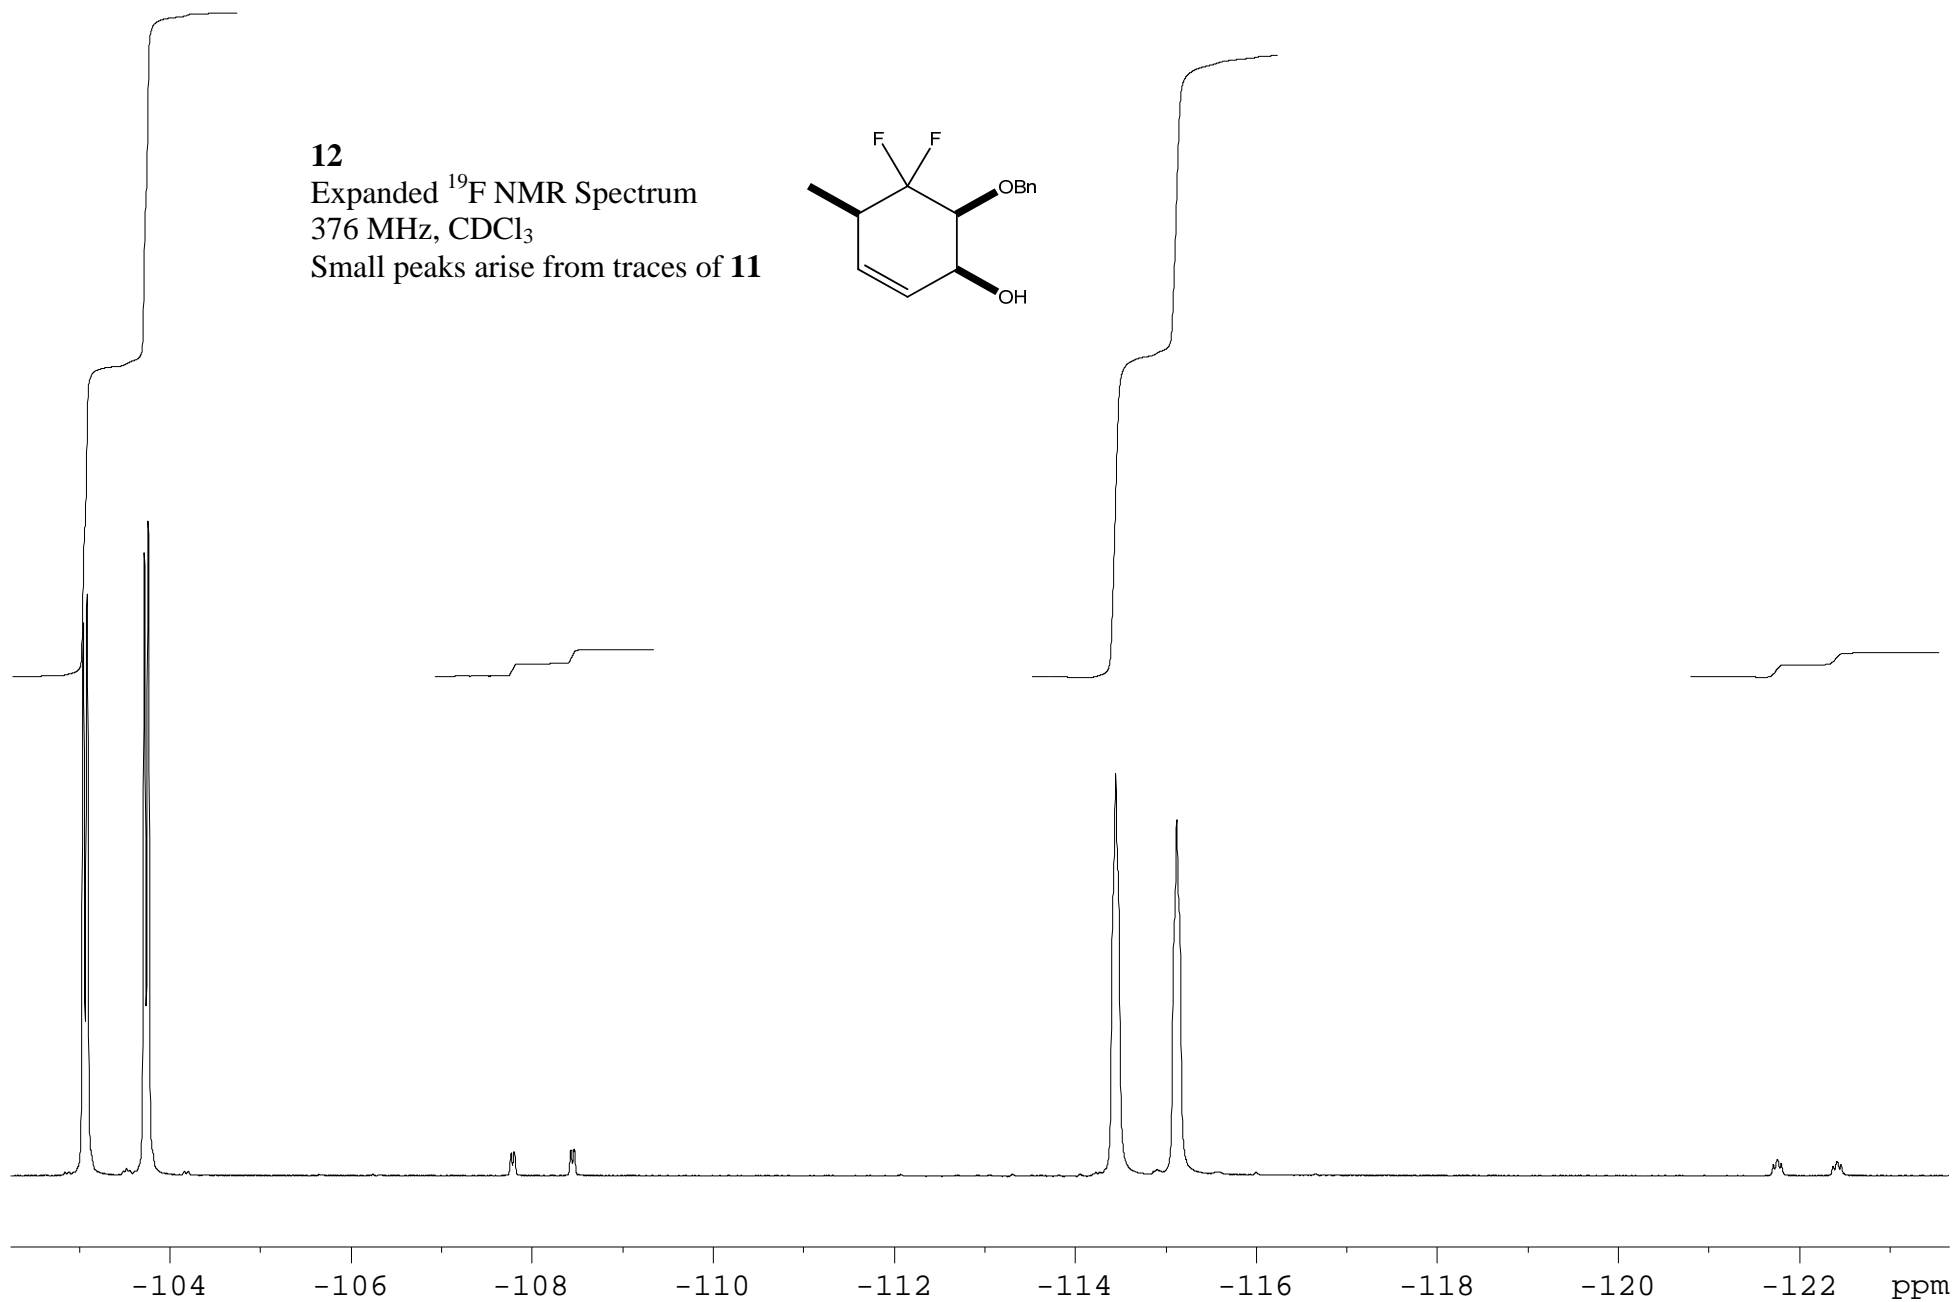

**17**  
<sup>1</sup>H NMR Spectrum  
300 MHz, CDCl<sub>3</sub>

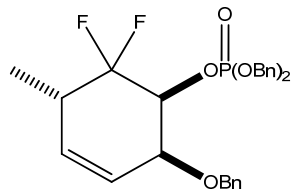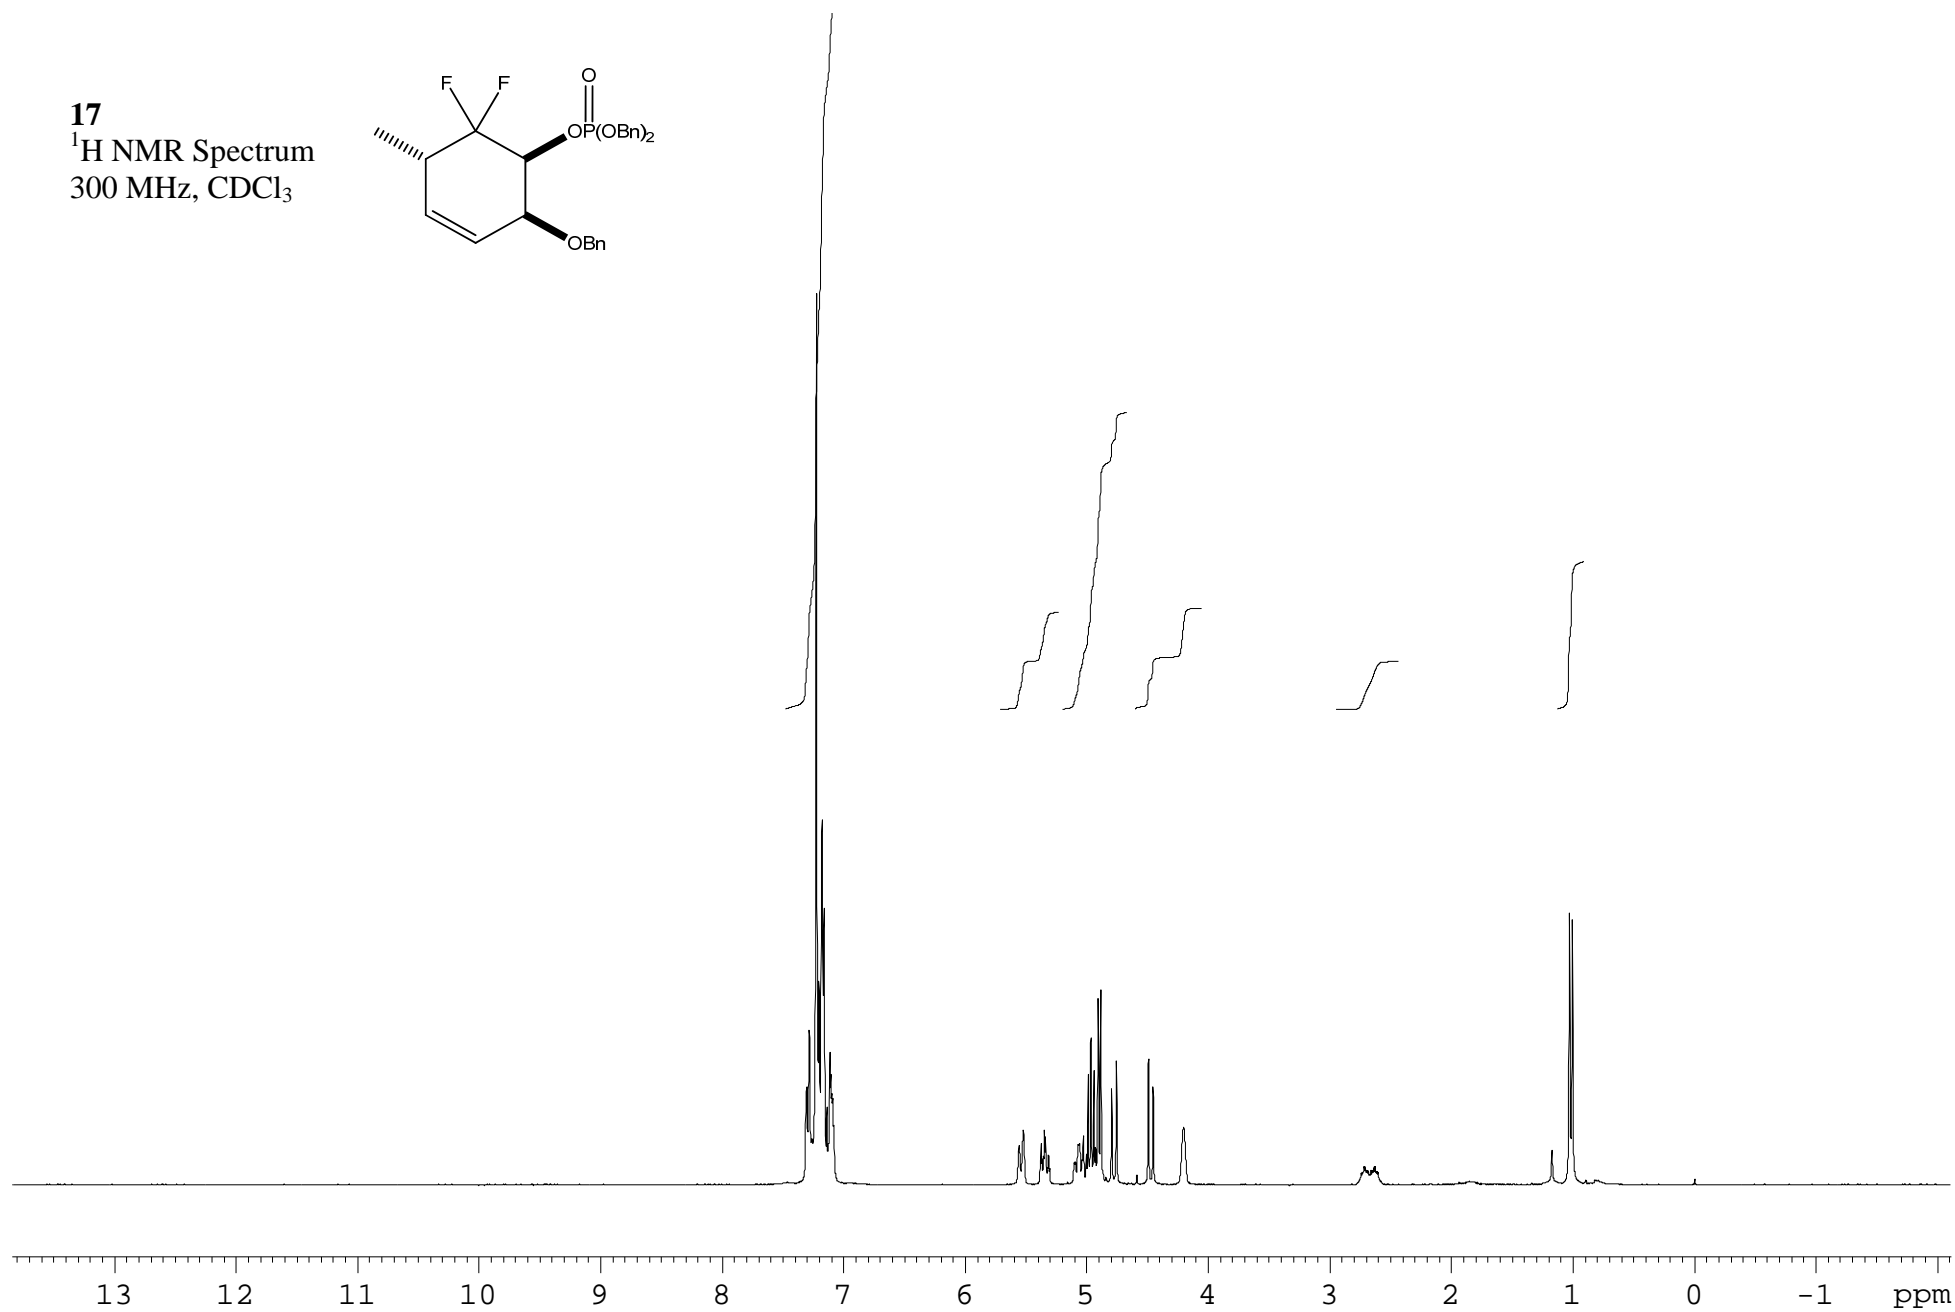

**17**  
Partial  $^1\text{H}$  NMR Spectrum  
300 MHz,  $\text{CDCl}_3$

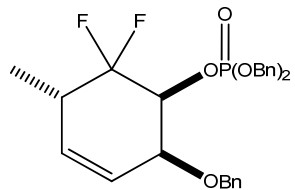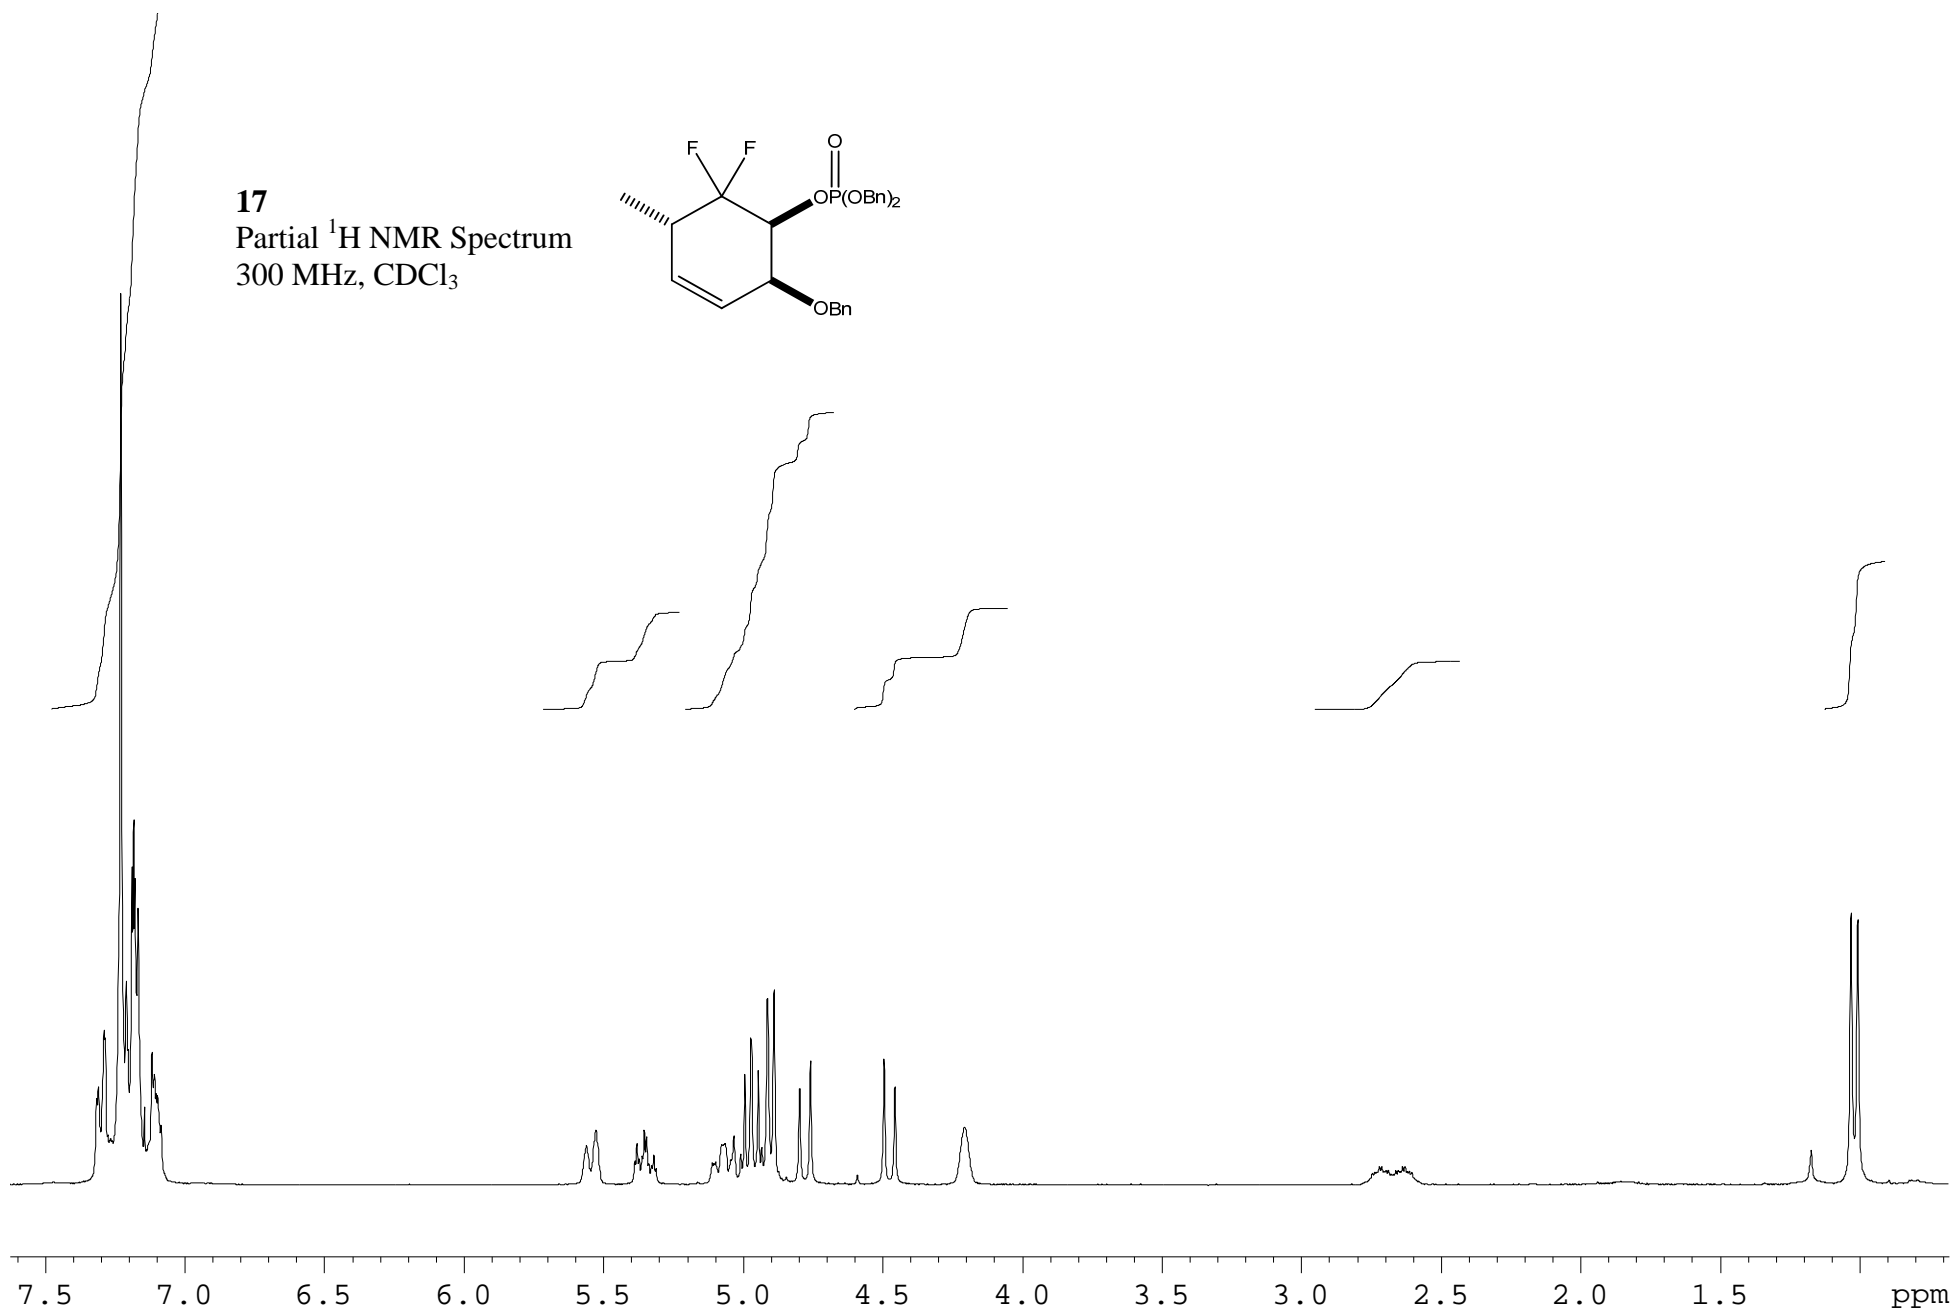





**17**  
<sup>13</sup>C NMR Spectrum  
100 MHz, CDCl<sub>3</sub>

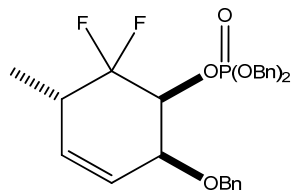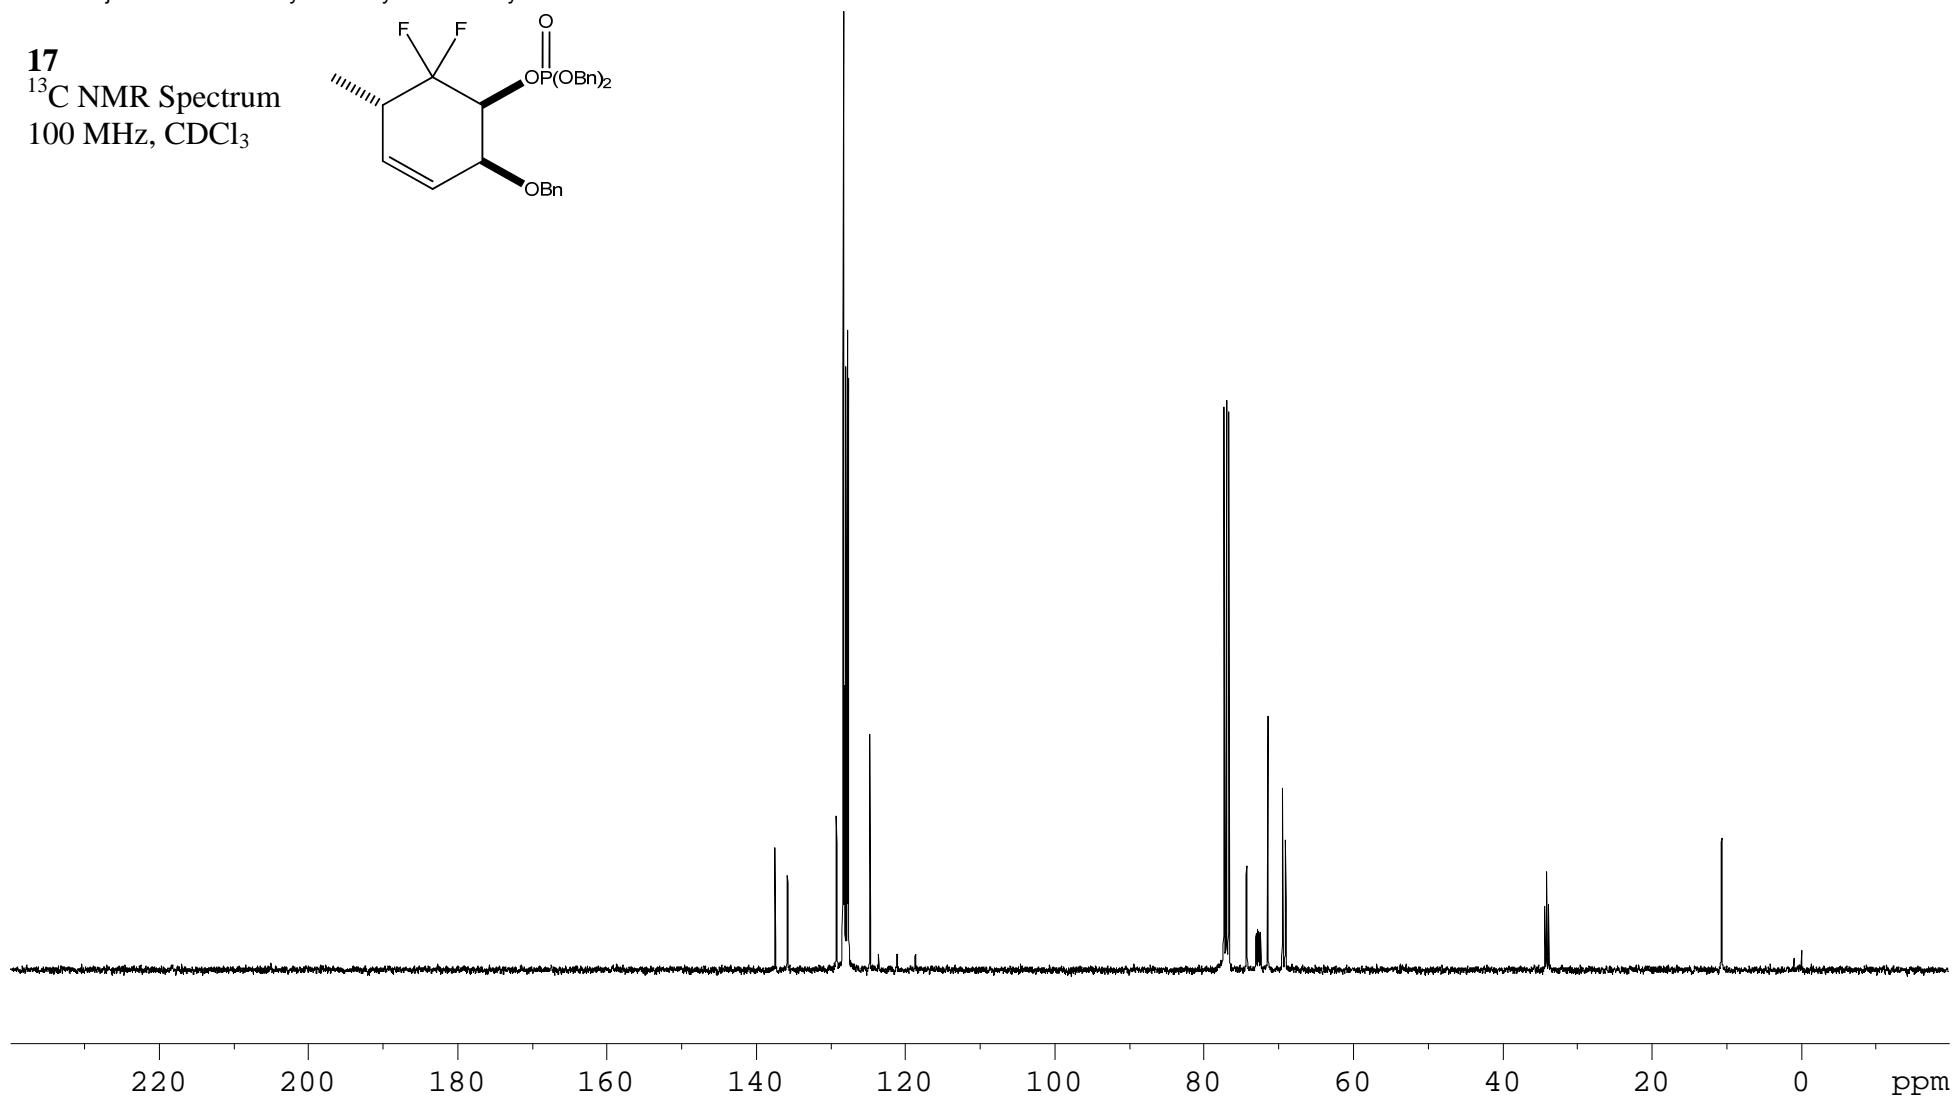

**17**  
Partial  $^{13}\text{C}$  NMR Spectrum  
100 MHz,  $\text{CDCl}_3$

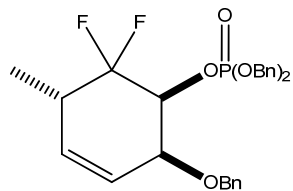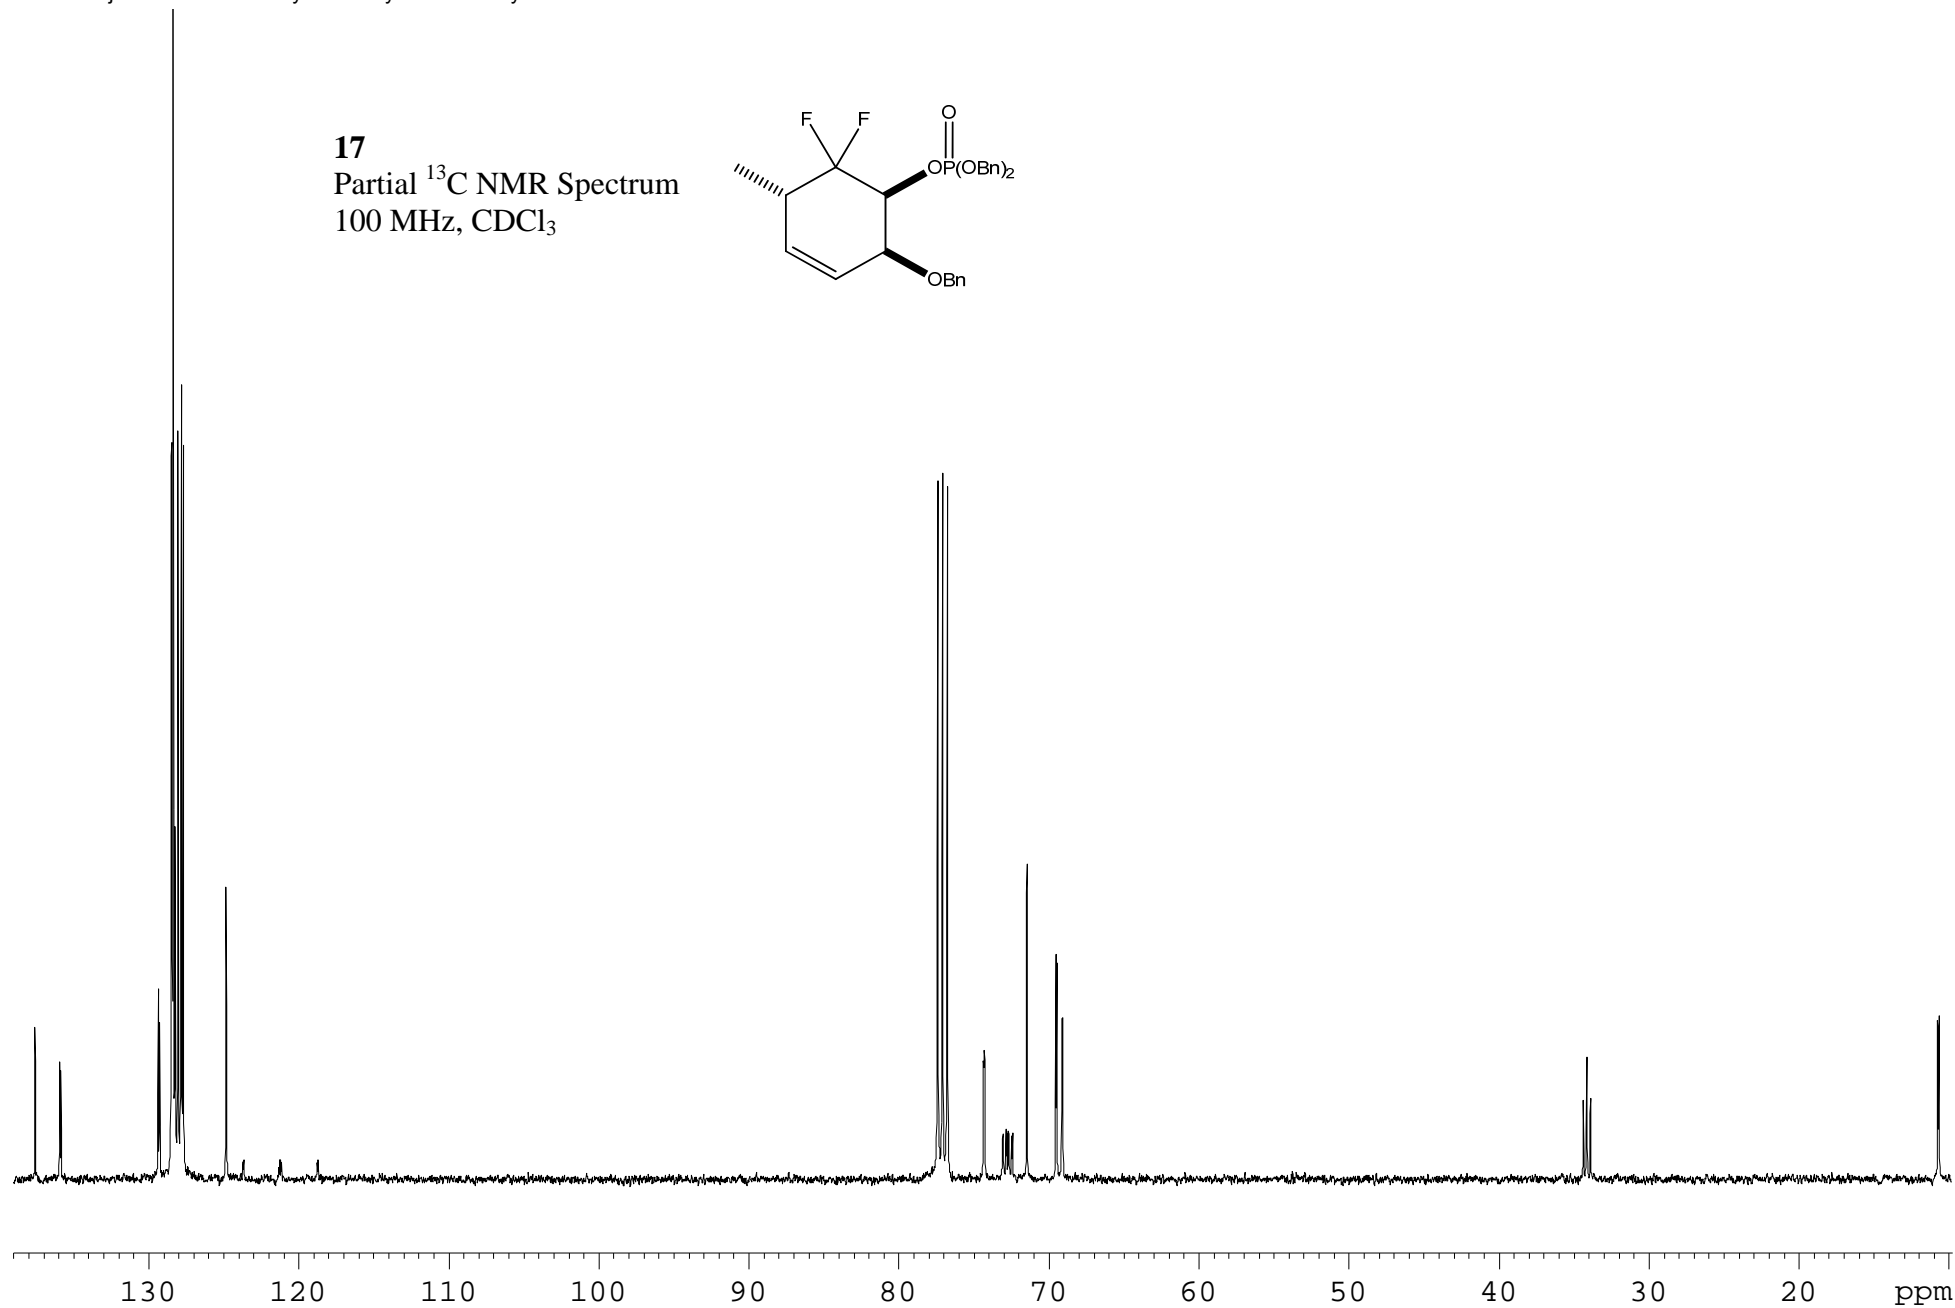

**17**  
 $^{19}\text{F}$  NMR Spectrum  
282 MHz,  $\text{CDCl}_3$

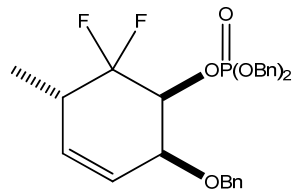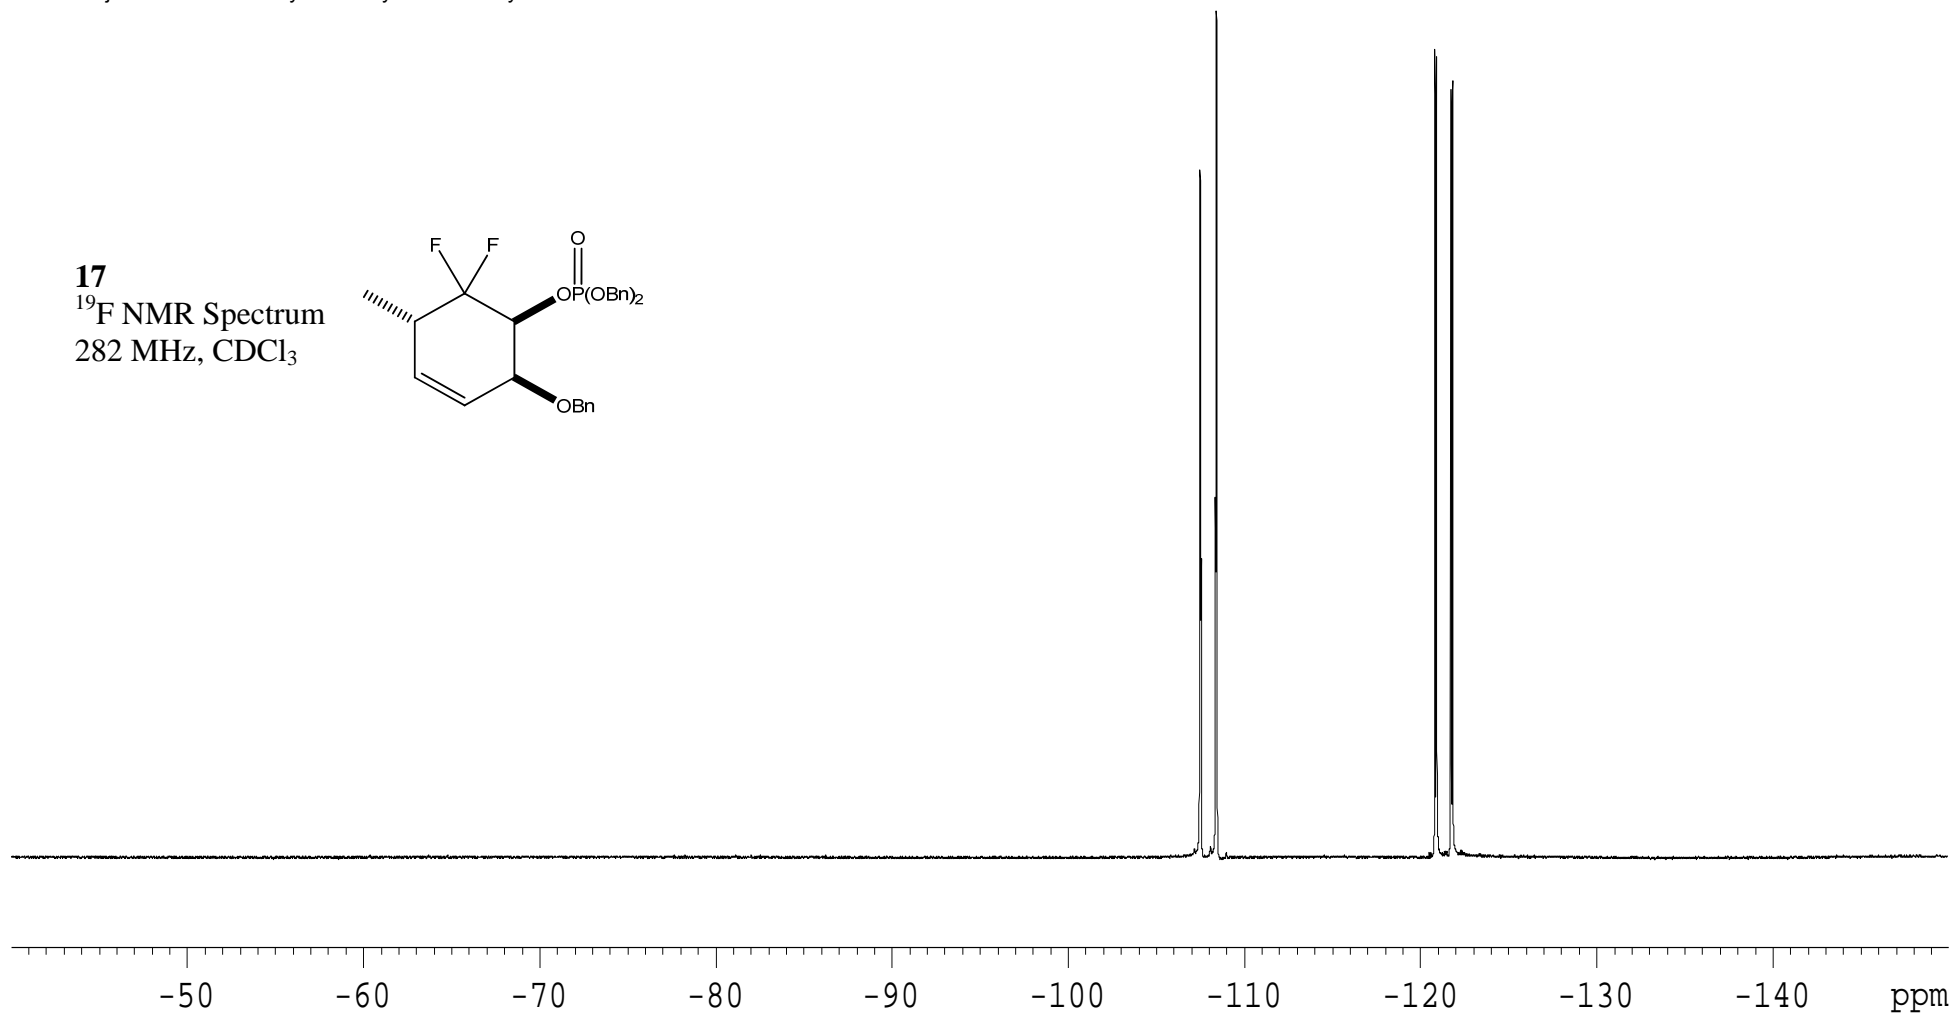

**17**  
Expanded  $^{19}\text{F}$  NMR Spectrum  
376 MHz,  $\text{CDCl}_3$

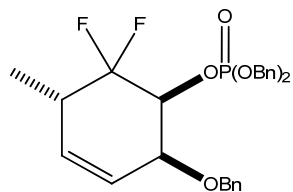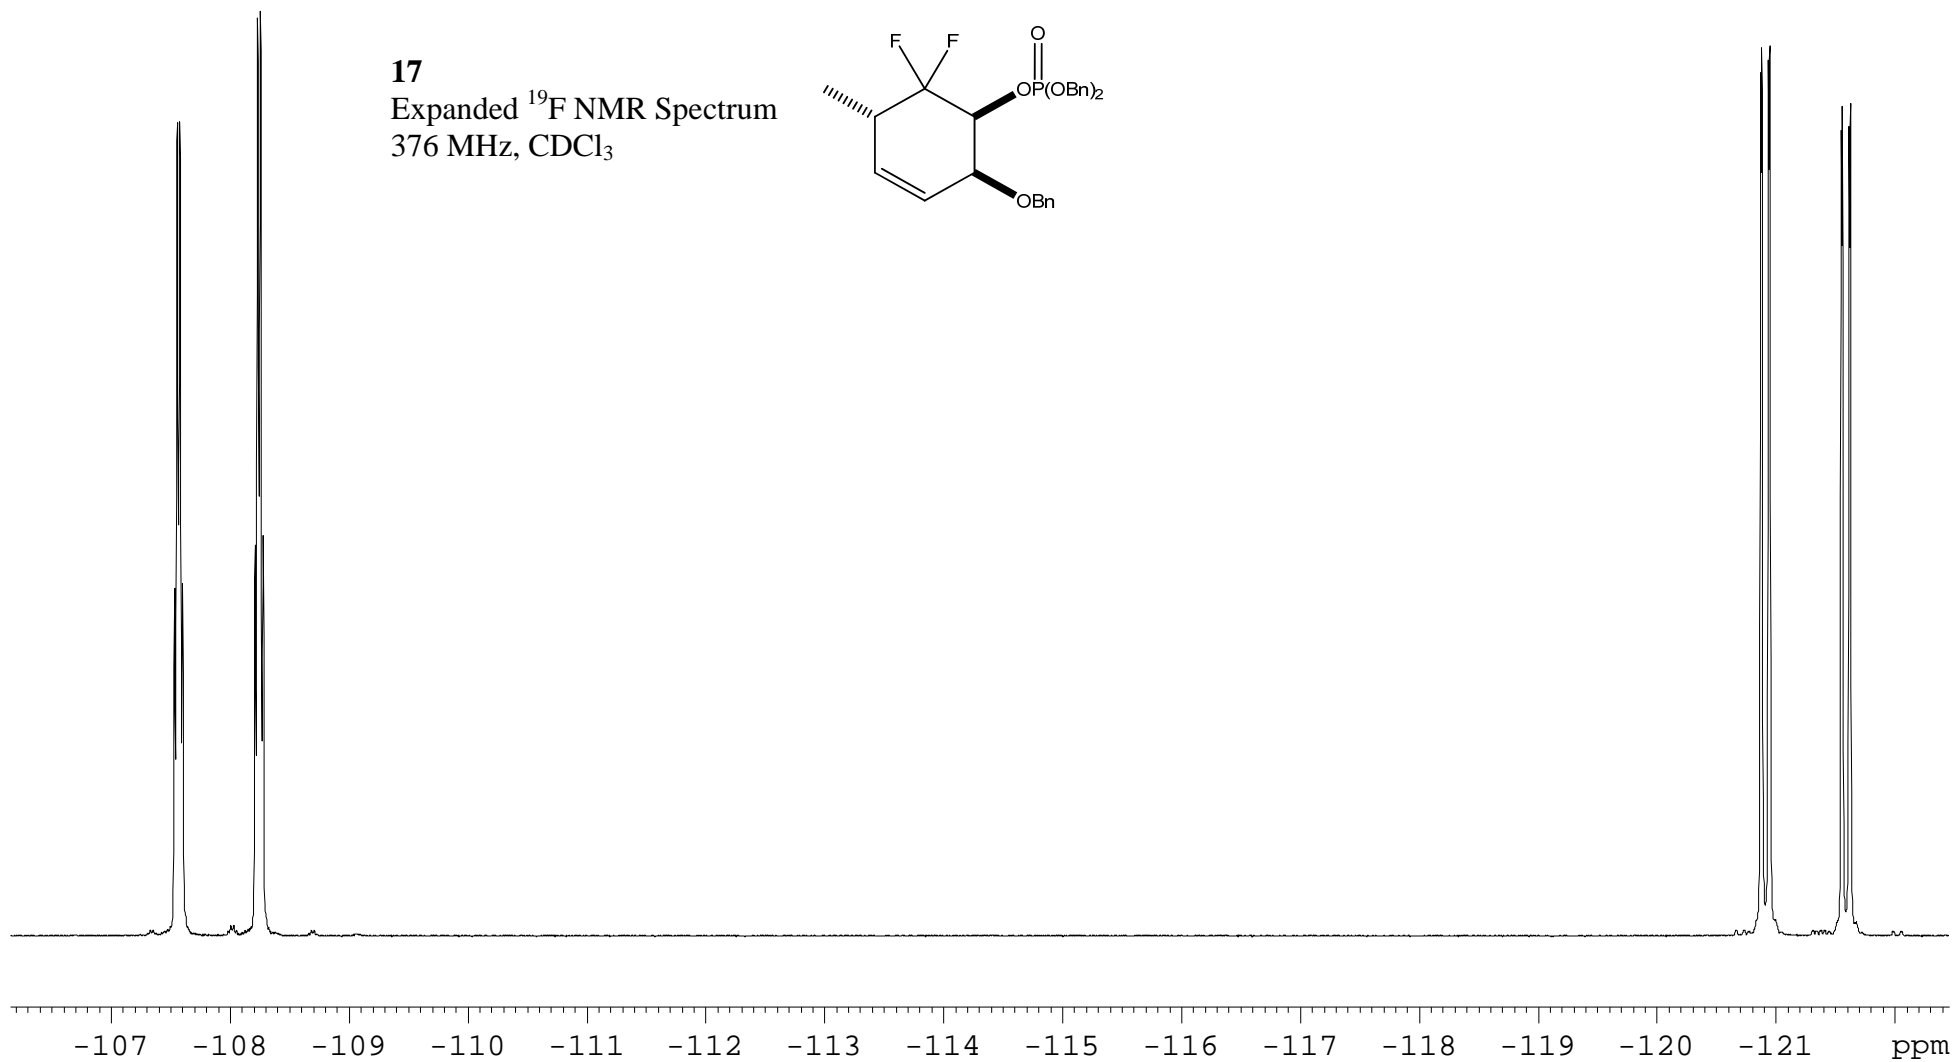

$^{31}\text{P}$  NMR Spectrum

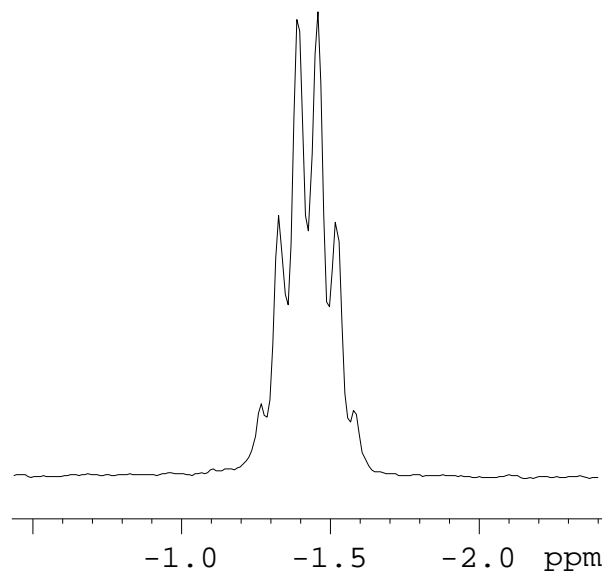

$\{^1\text{H}\}^{31}\text{P}$  NMR Spectrum

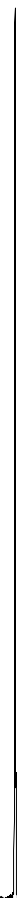

**17**  
 $^{31}\text{P}$  NMR Spectra  
121 MHz,  $\text{CDCl}_3$

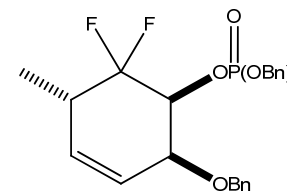



**18**  
<sup>1</sup>H NMR Spectrum  
300 MHz, CDCl<sub>3</sub>

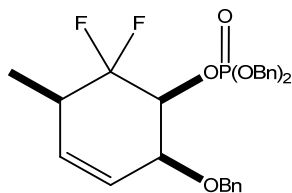

Expanded <sup>1</sup>H NMR Spectrum  
300 MHz, CDCl<sub>3</sub>

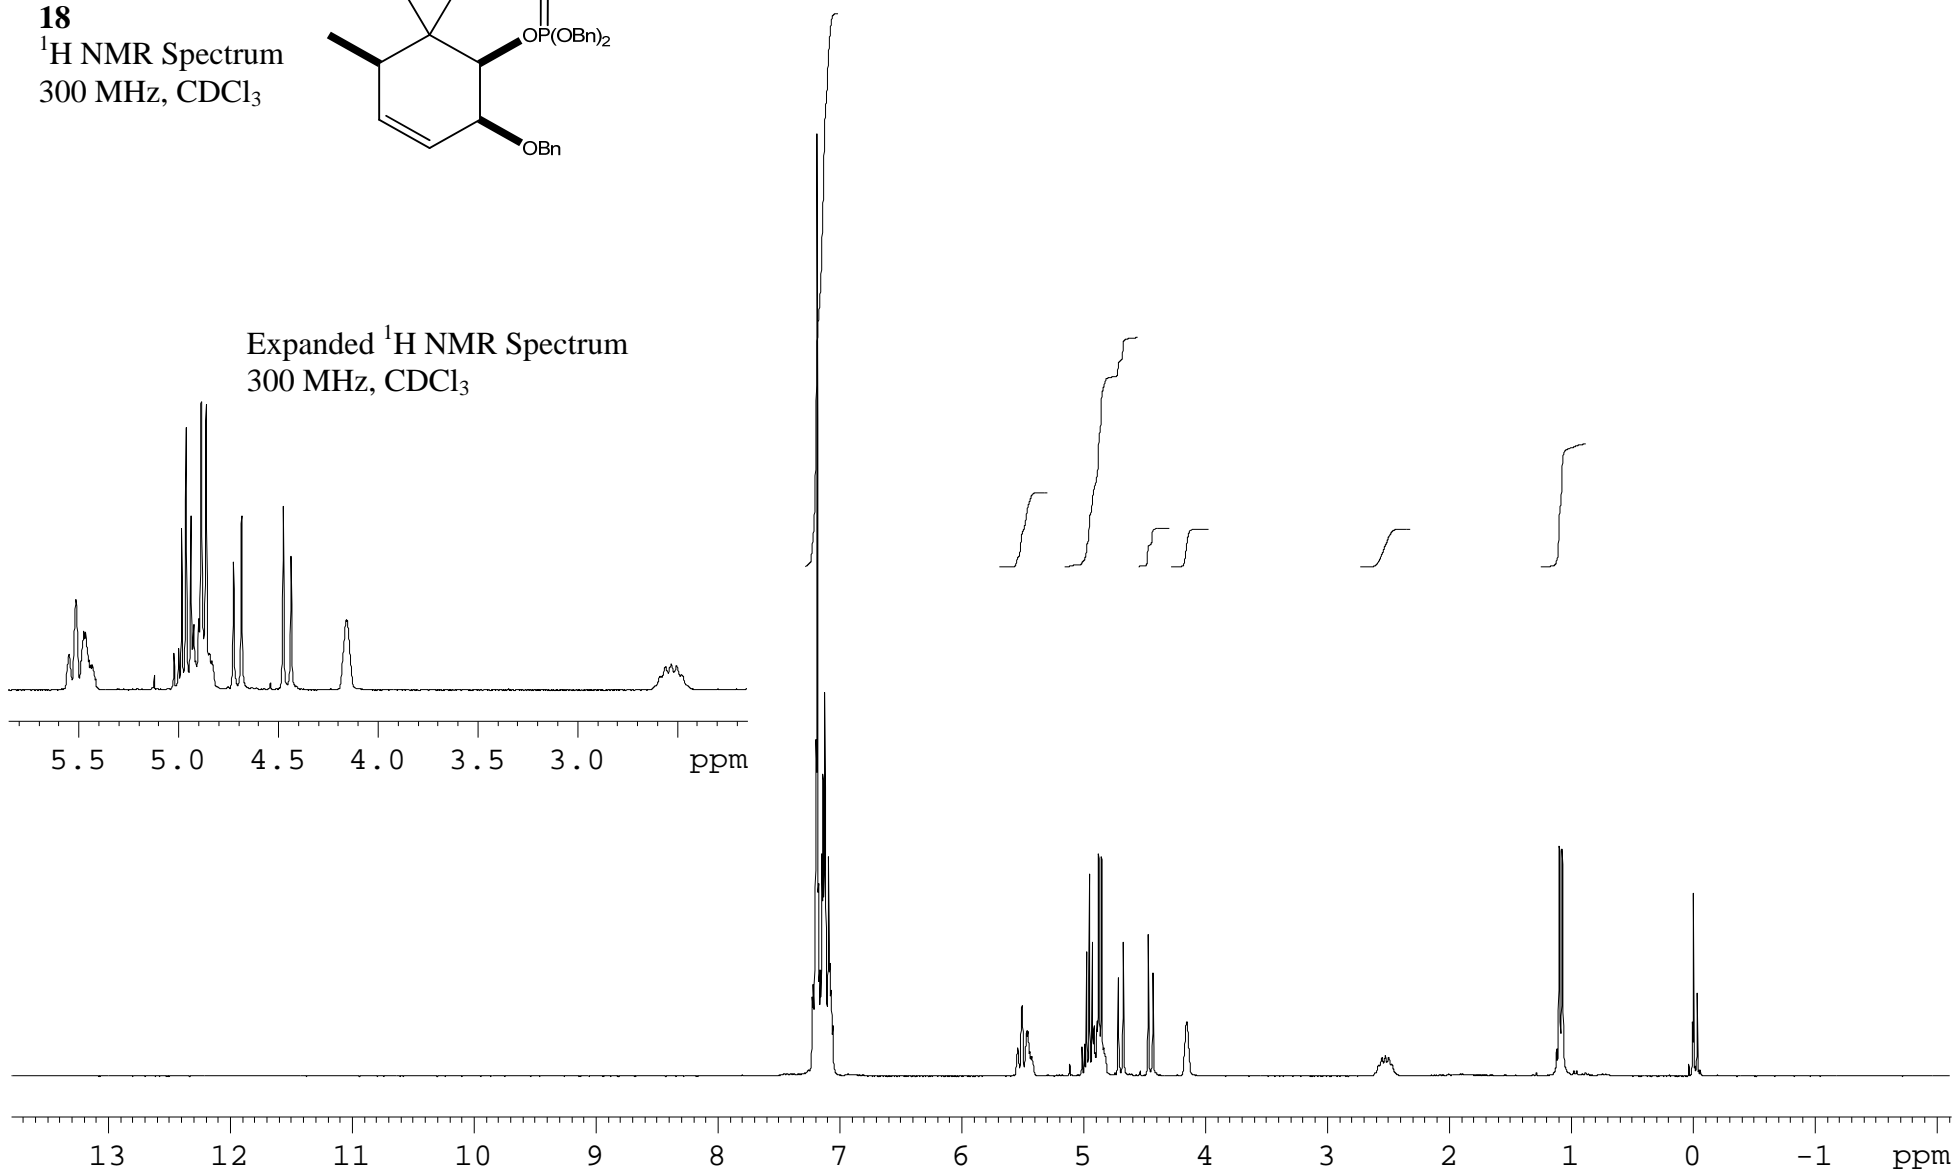



**18**  
 $^{13}\text{C}$  NMR Spectrum  
100 MHz,  $\text{CDCl}_3$

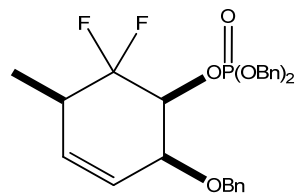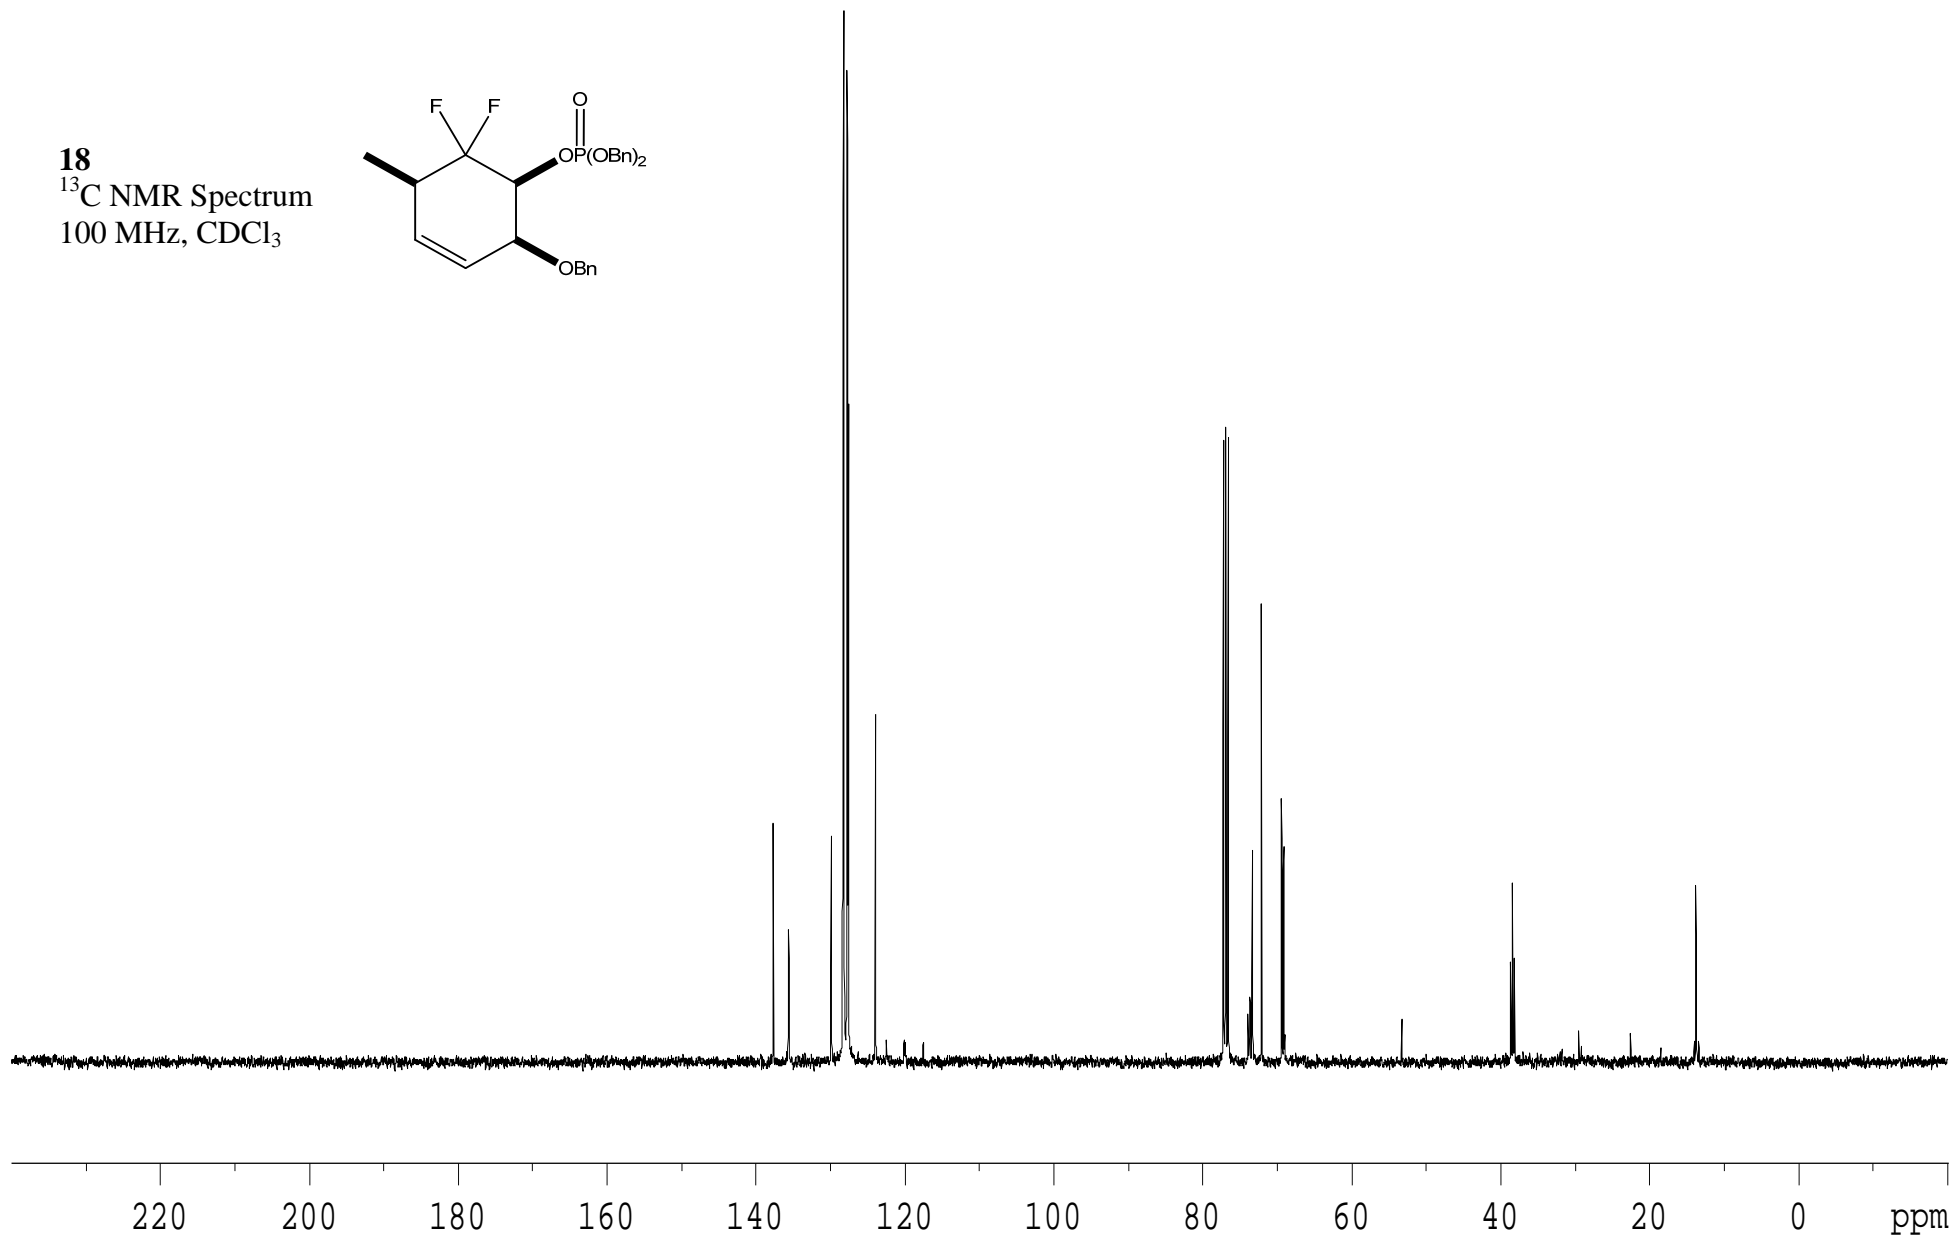

**18**  
Expanded  $^{13}\text{C}$  NMR Spectrum  
100 MHz,  $\text{CDCl}_3$

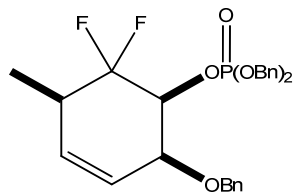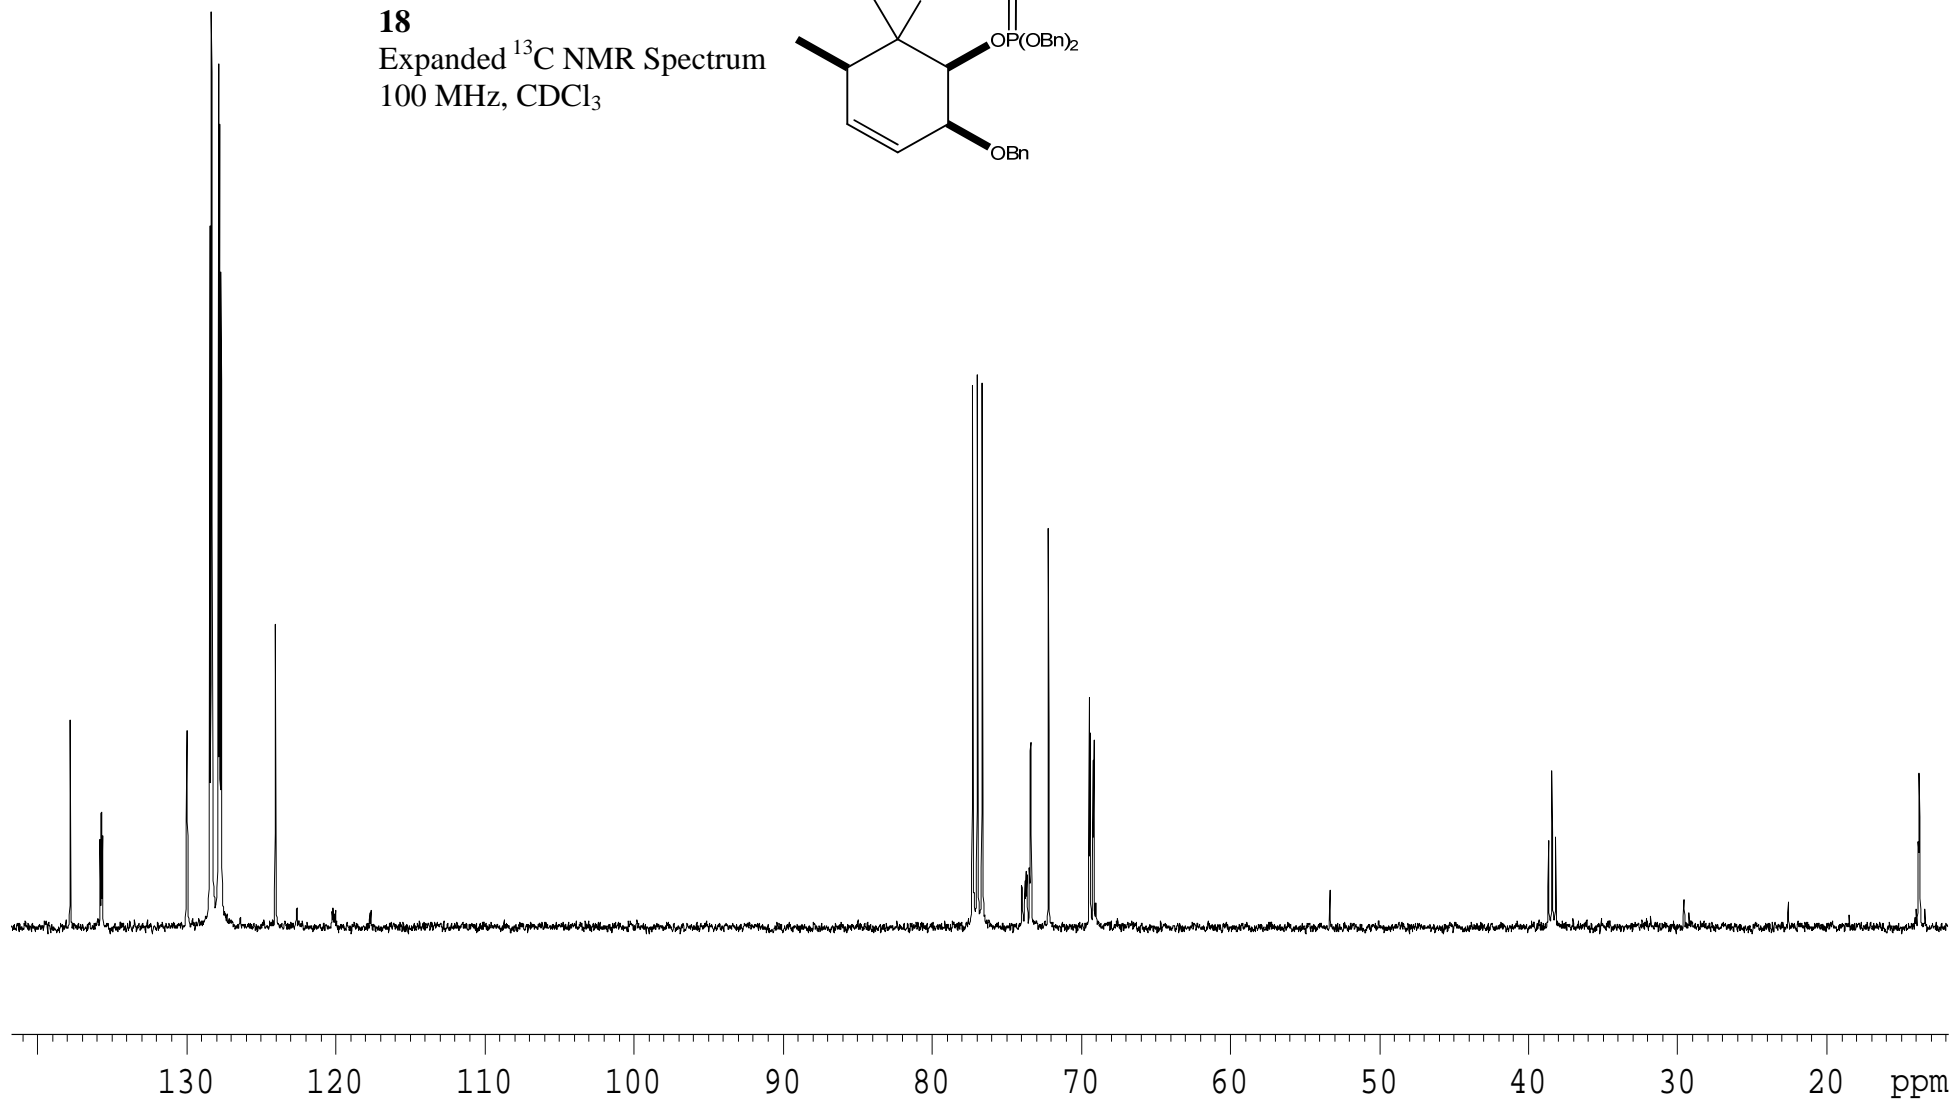

**18**  
 $^{19}\text{F}$  NMR Spectrum  
282 MHz,  $\text{CDCl}_3$

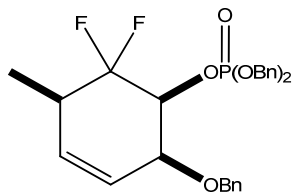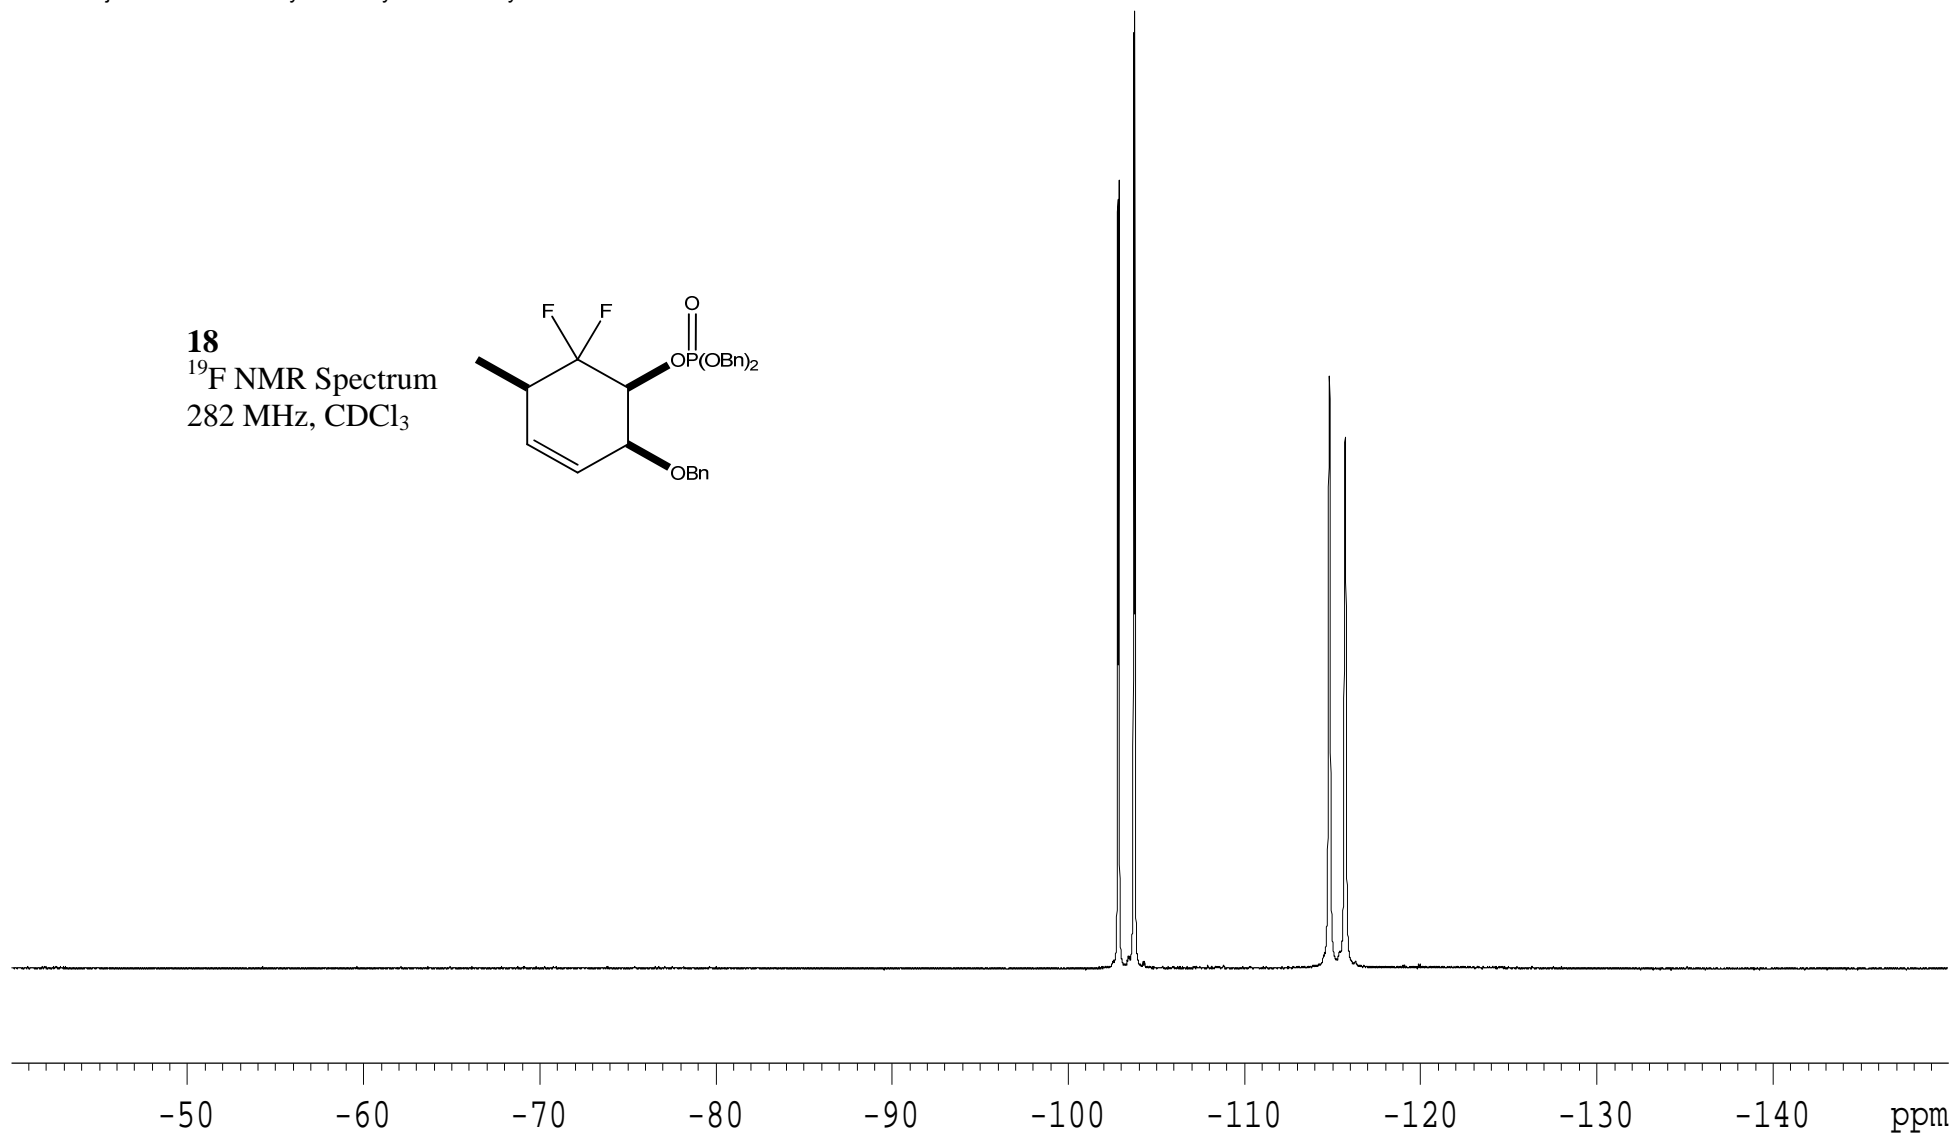

**18**  
Expanded  $^{19}\text{F}$  NMR Spectrum  
376 MHz,  $\text{CDCl}_3$

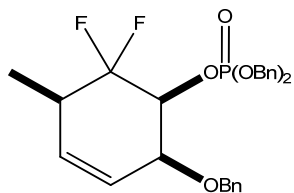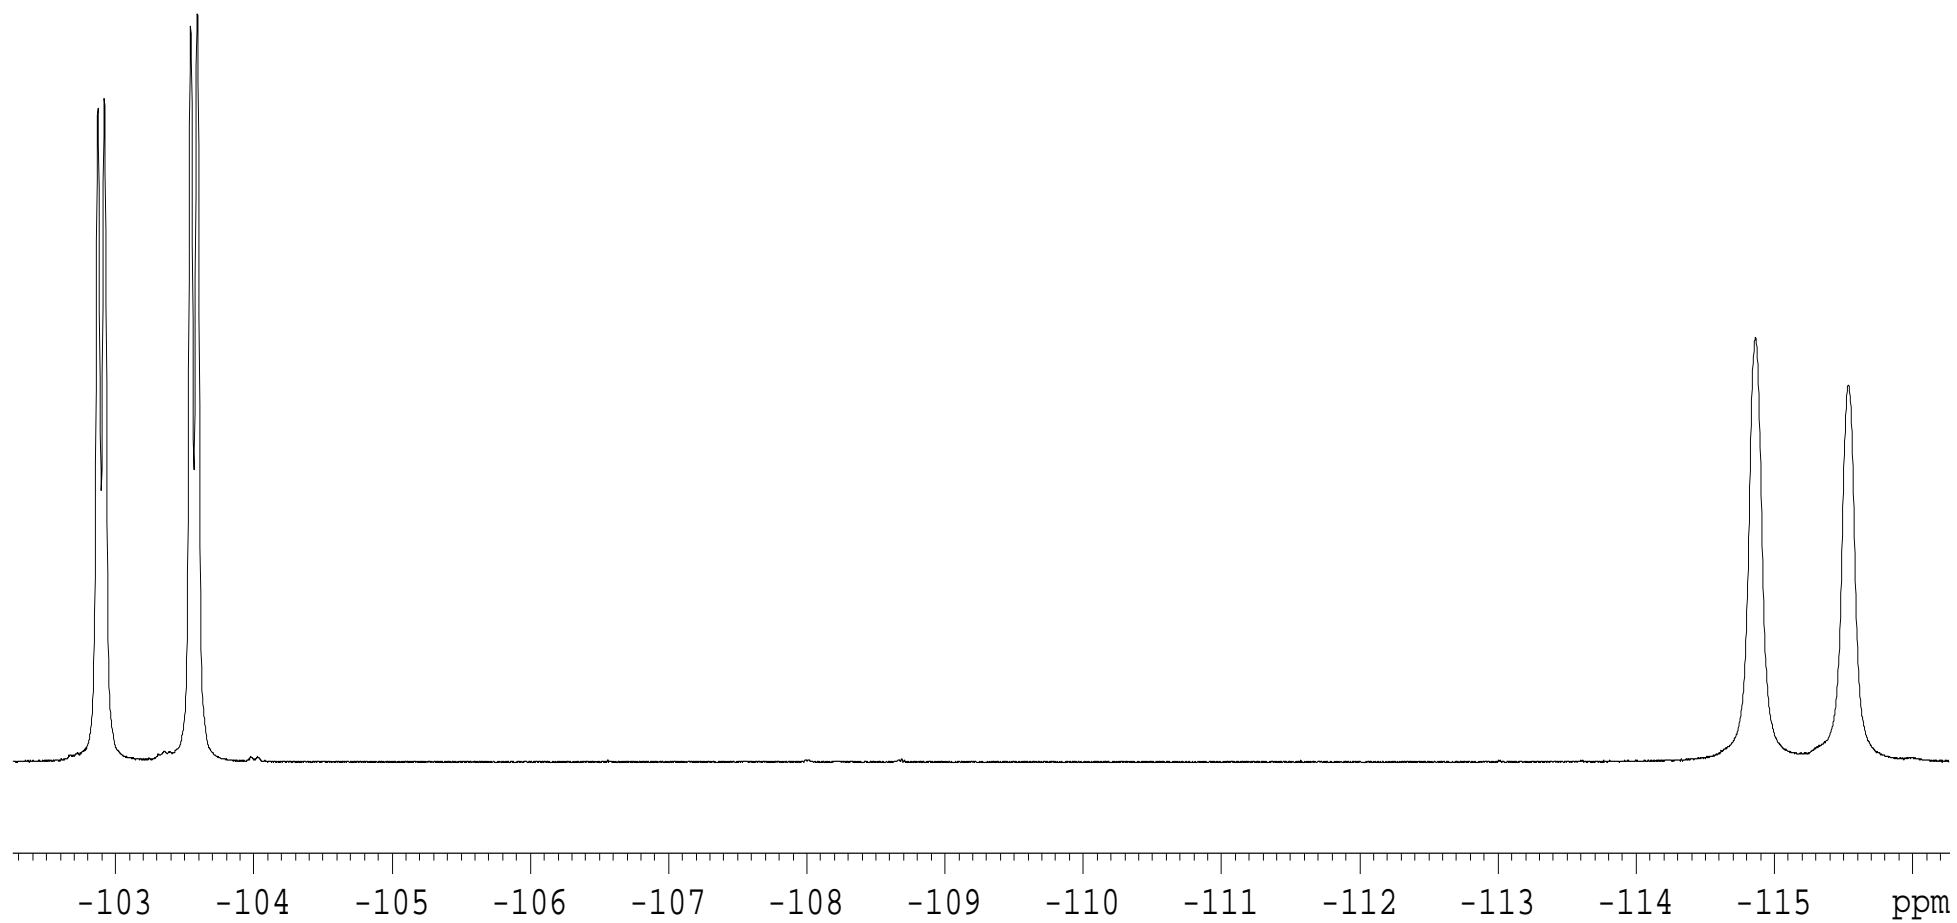

**18**  
 $^{31}\text{P}\{^1\text{H}\}$  NMR Spectra  
121 MHz,  $\text{CDCl}_3$

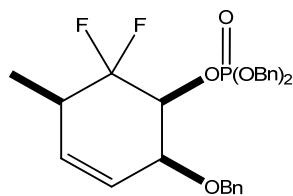

$^{31}\text{P}\{^1\text{H}\}$  NMR Spectrum

$^{31}\text{P}$  NMR Spectrum

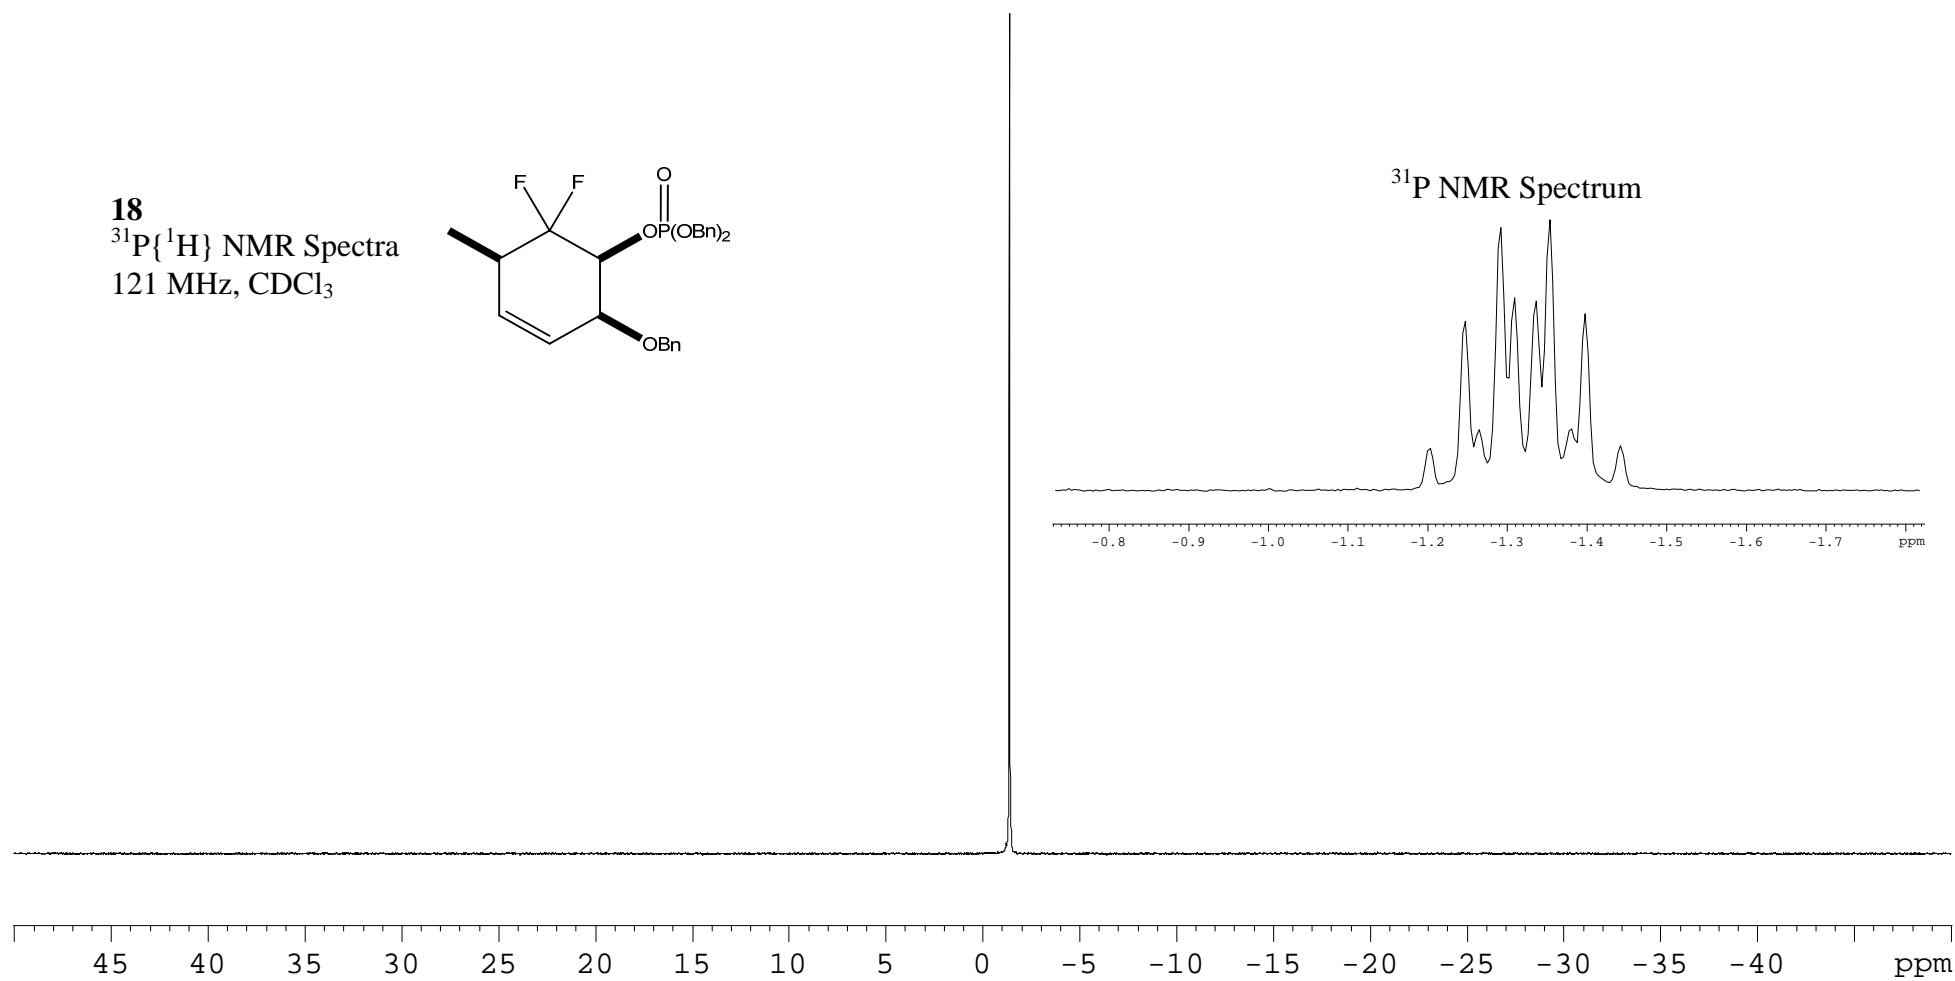



**19**  
<sup>1</sup>H NMR Spectrum  
400 MHz, CDCl<sub>3</sub>

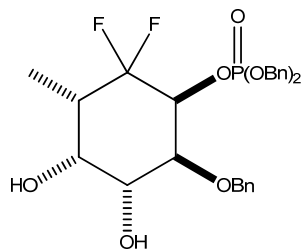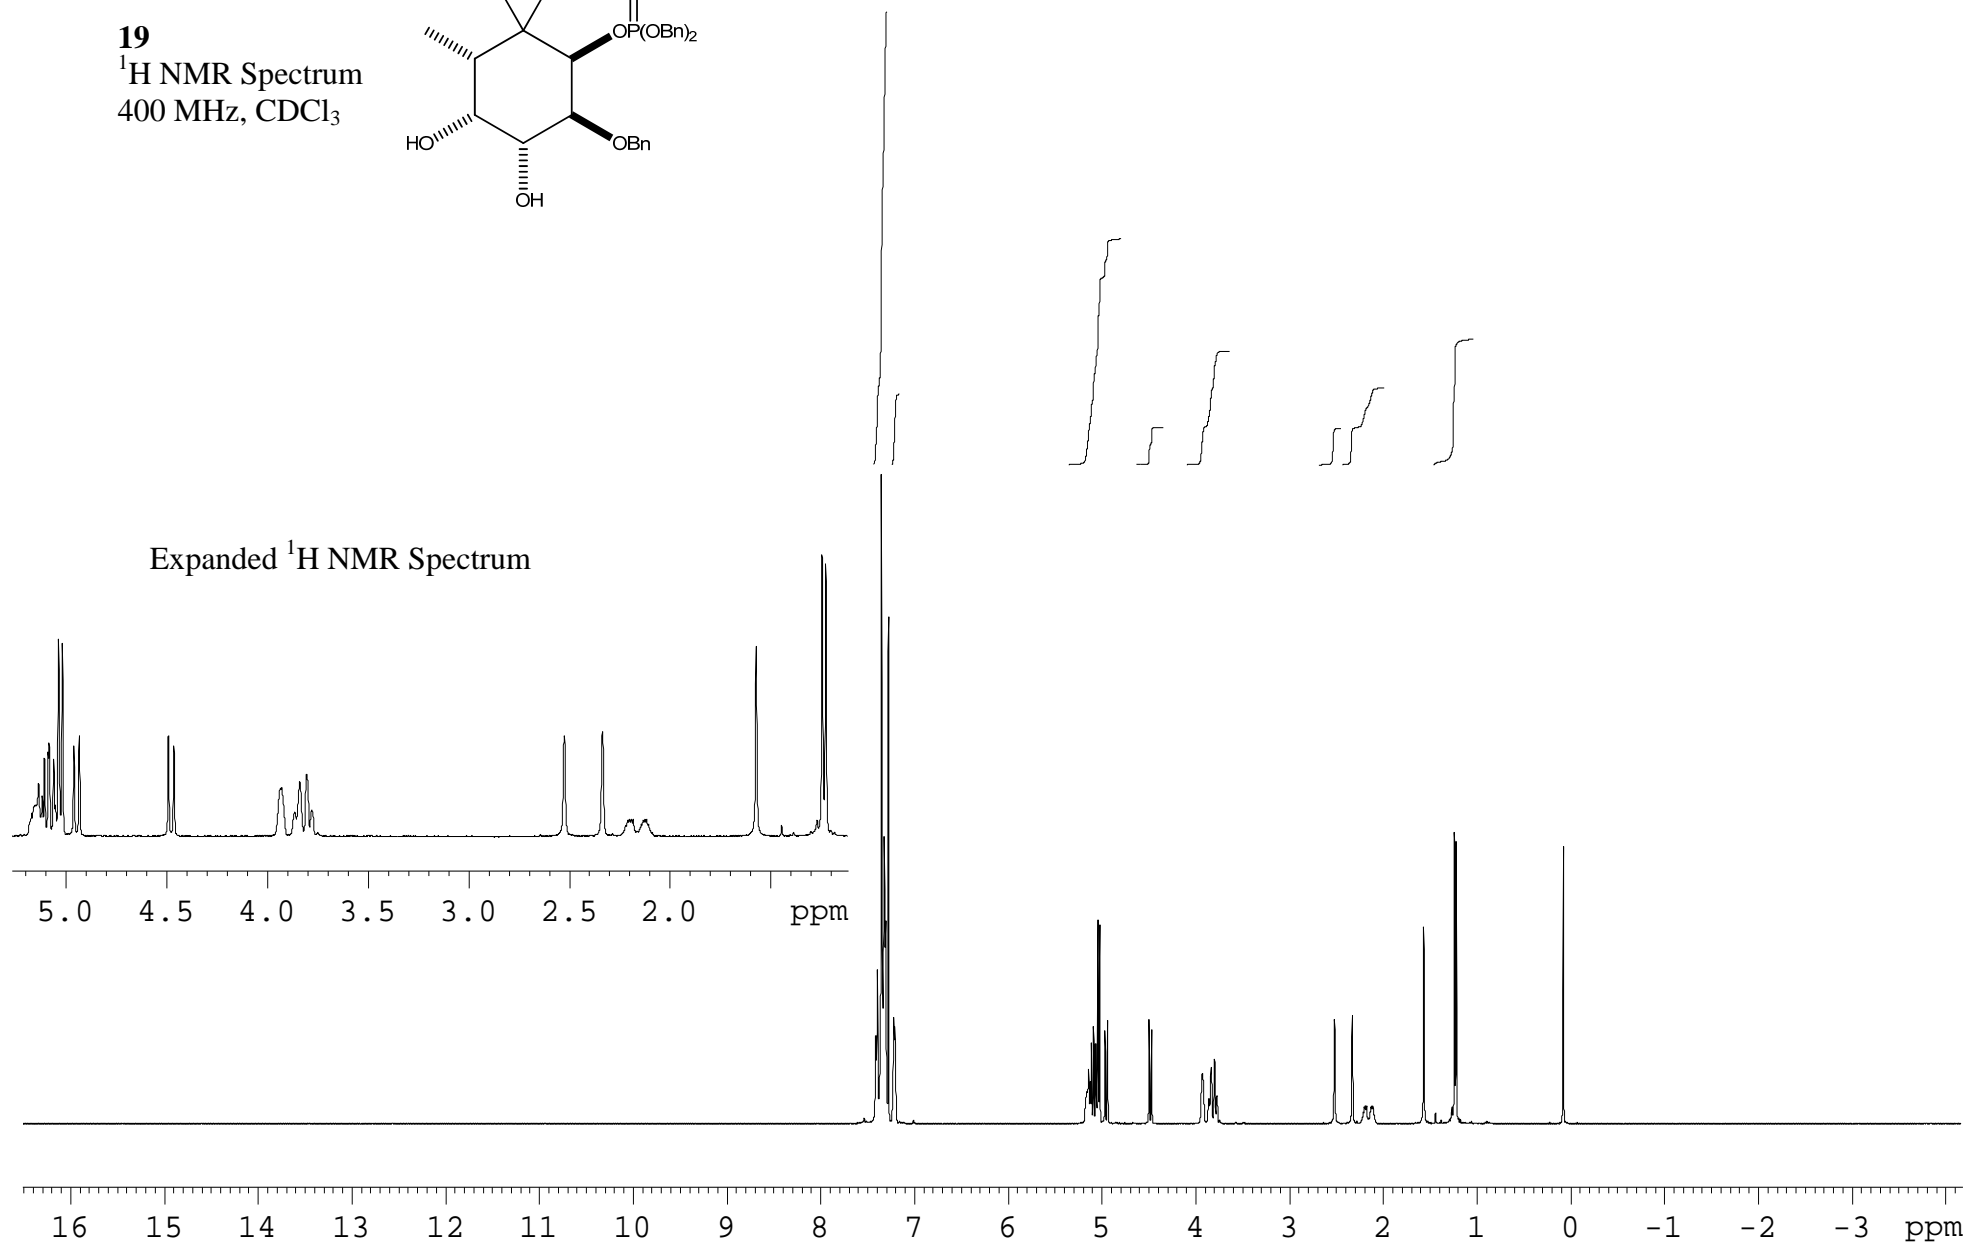











**19**

Partial  $^1\text{H}$  NMR Spectrum  
400 MHz,  $\text{CDCl}_3$

**19**

Partial  $\{^{19}\text{F}\}^1\text{H}$  NMR Spectrum  
400 MHz,  $\text{CDCl}_3$



**19**  
<sup>13</sup>C NMR JMOD Spectrum  
125 MHz, CDCl<sub>3</sub>

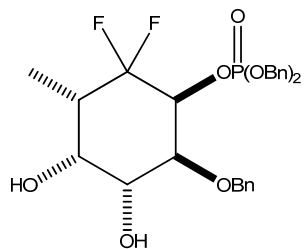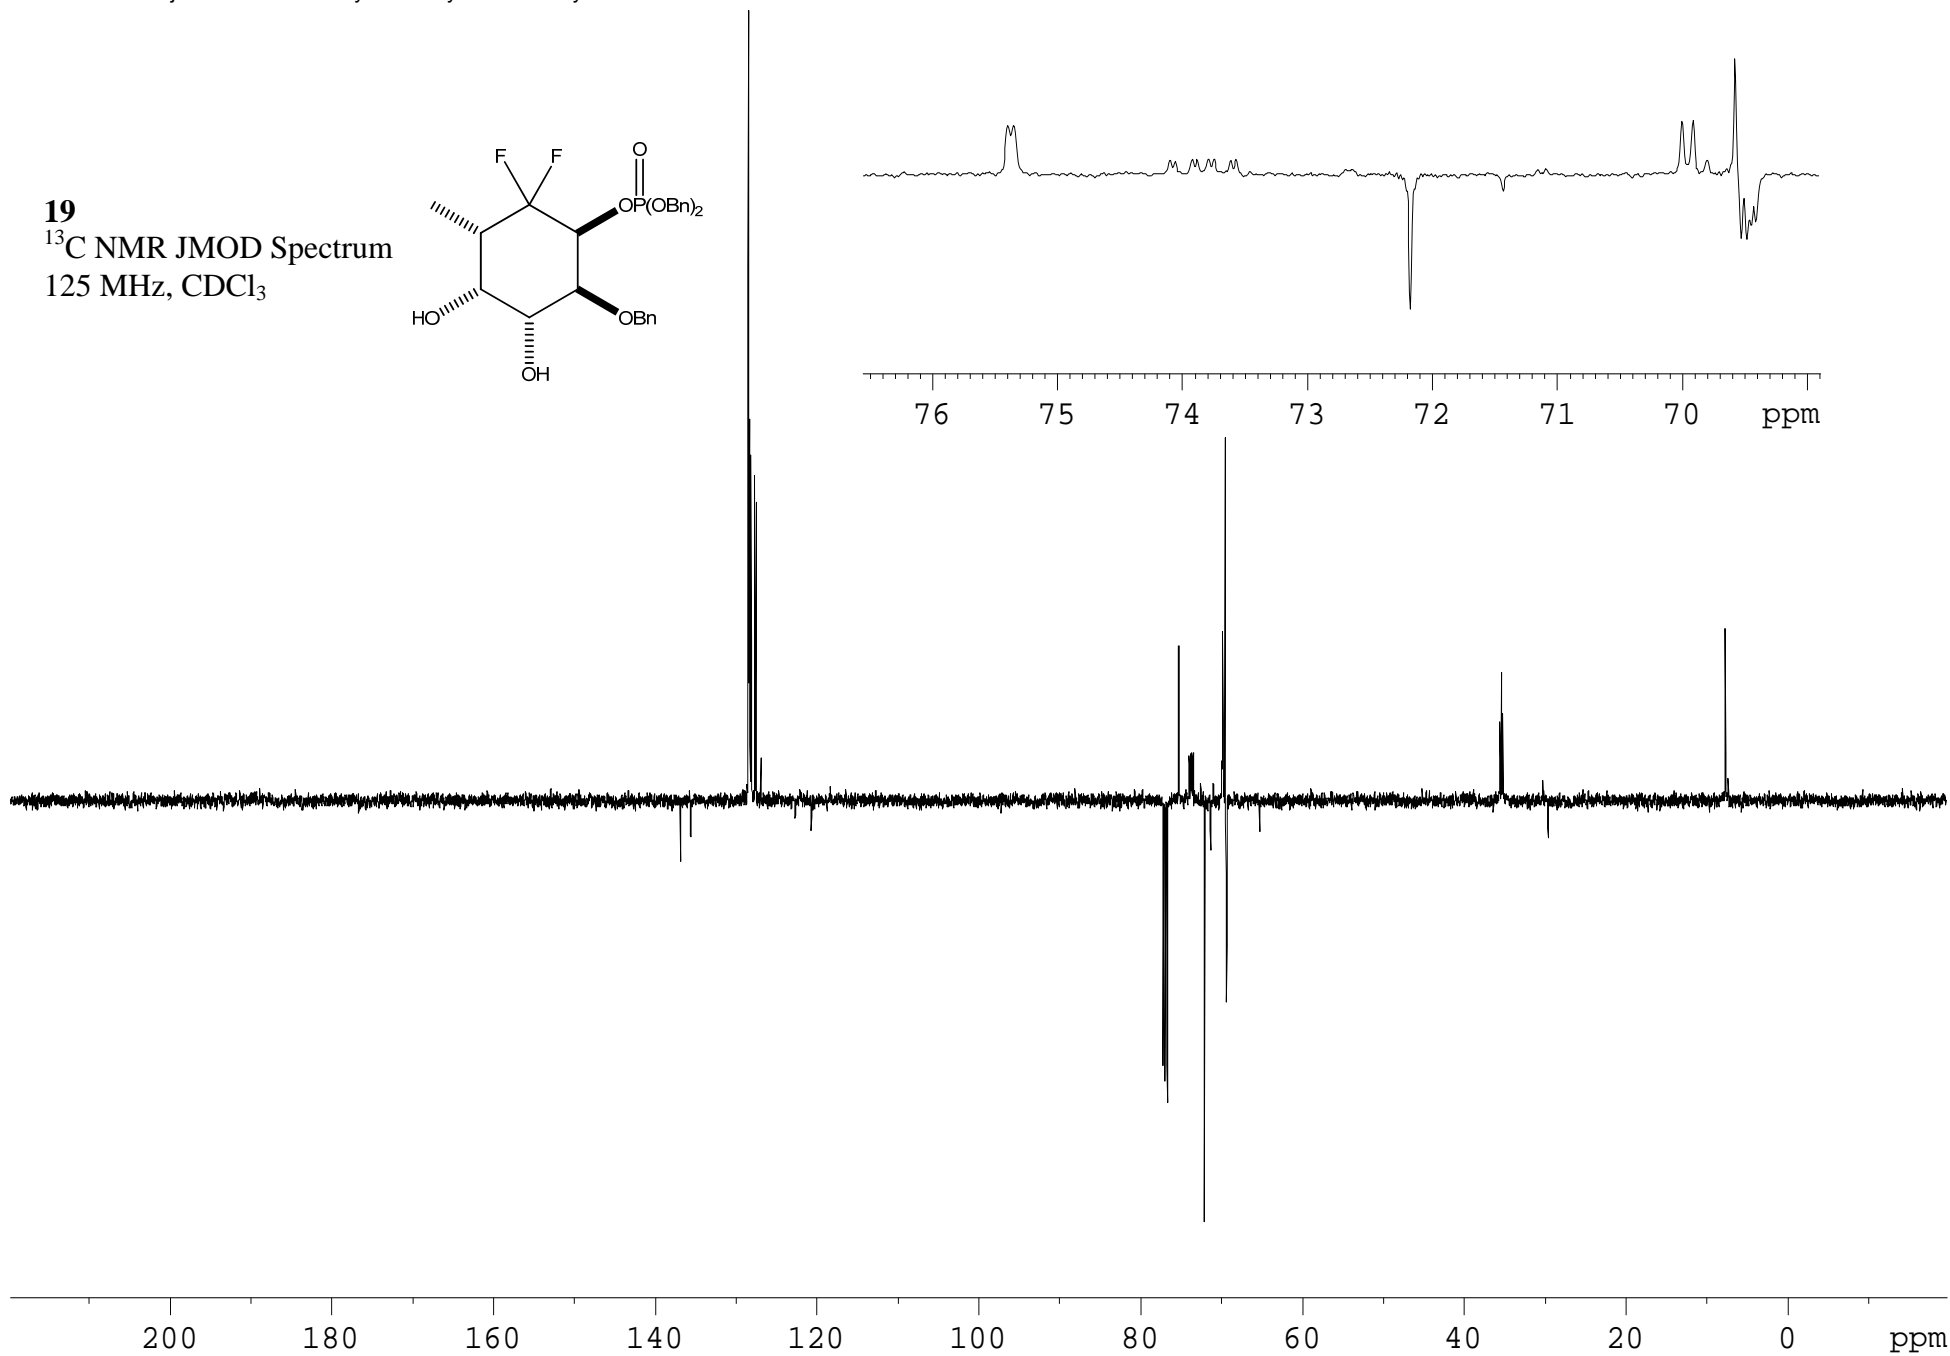

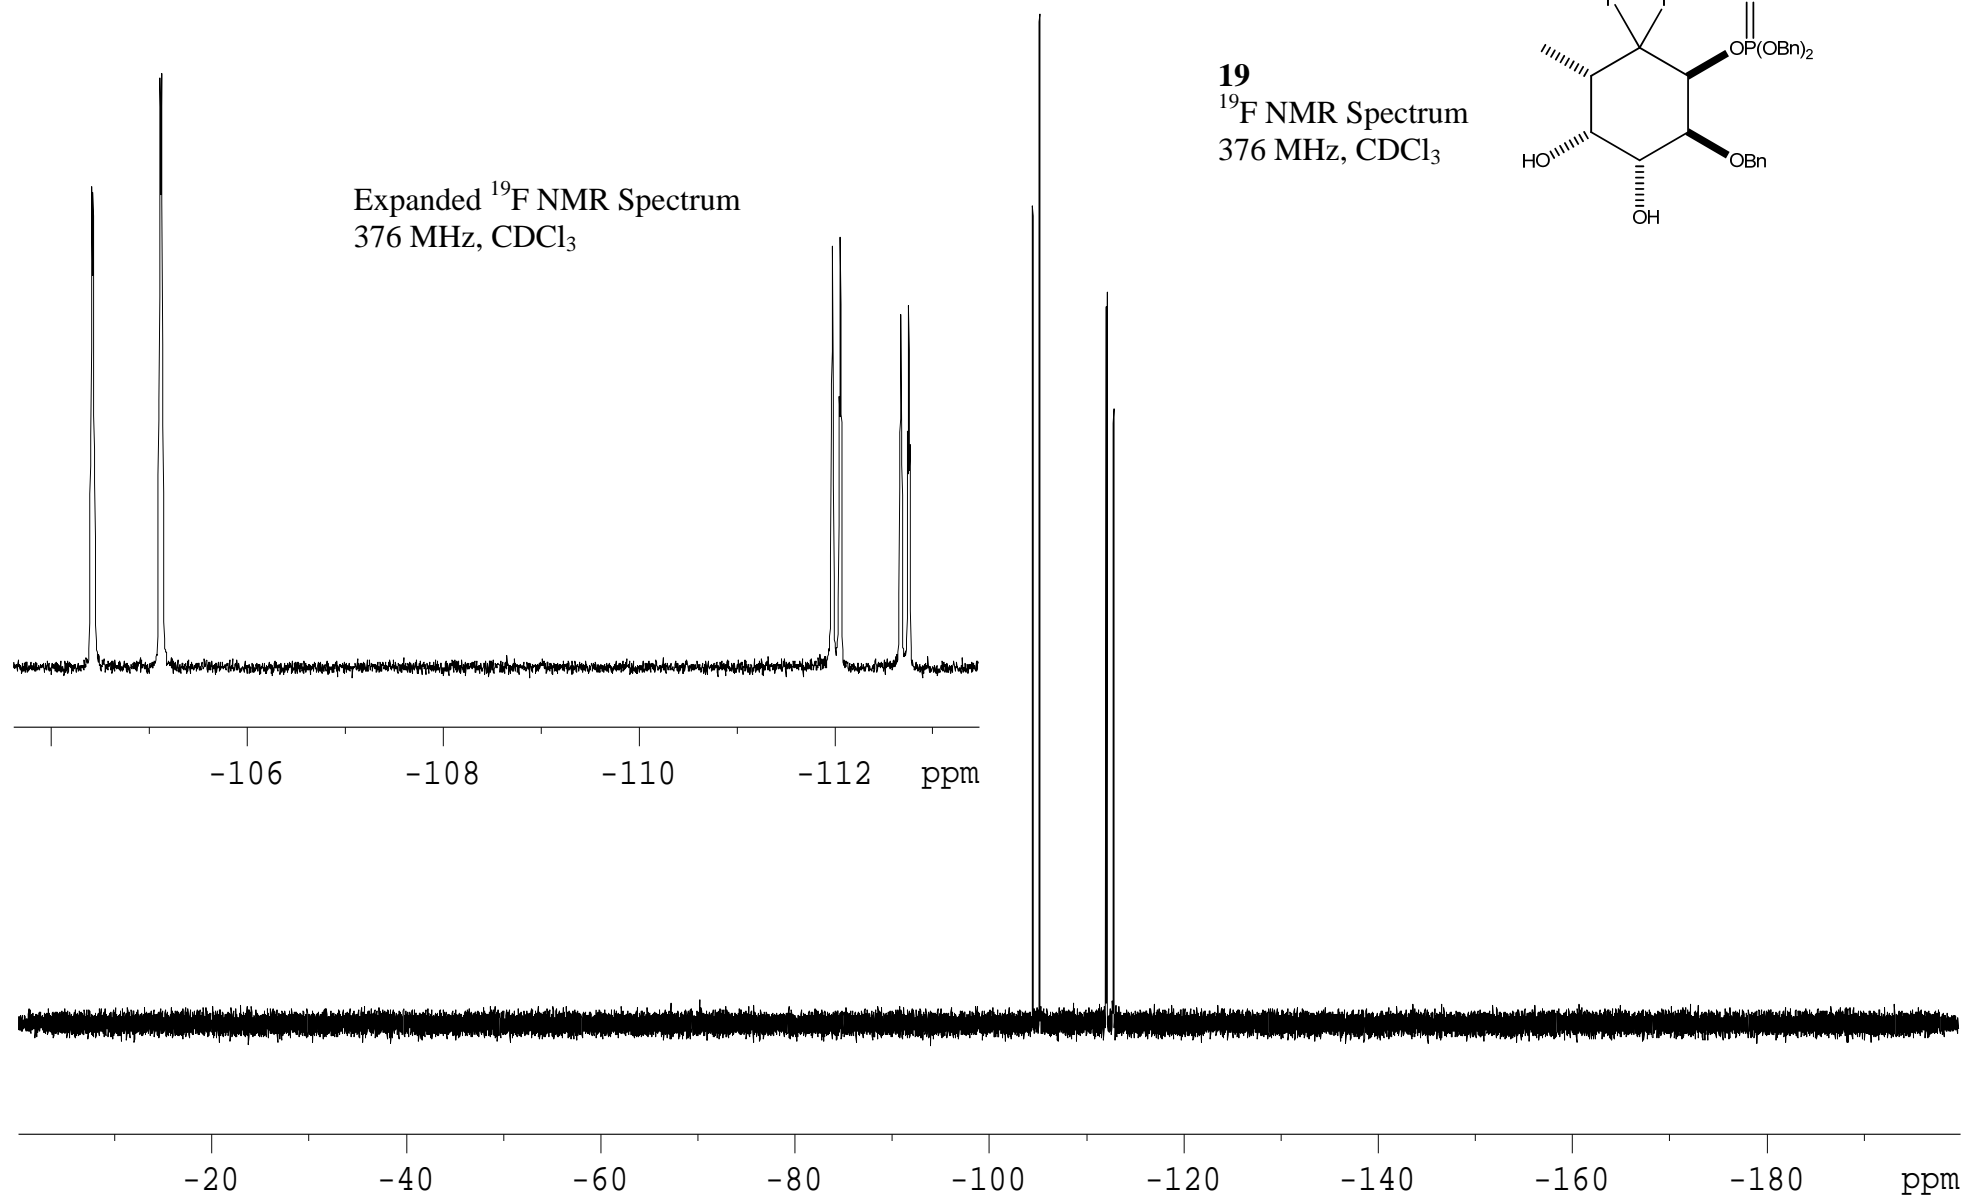

$^{31}\text{P}$  NMR Spectrum

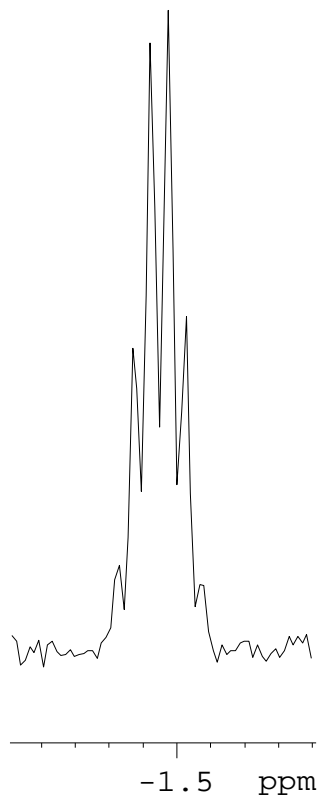

$\{^1\text{H}\}^{31}\text{P}$  NMR Spectrum

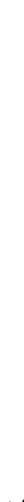

**19**  
 $^{31}\text{P}$  NMR Spectra  
162 MHz,  $\text{CDCl}_3$

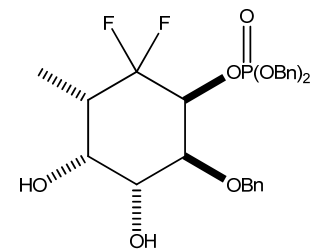

200

150

100

50

0

-50

-100

-150

ppm



**20**  
<sup>1</sup>H NMR Spectrum  
400 MHz, CDCl<sub>3</sub>

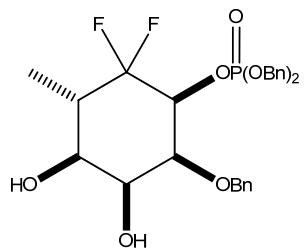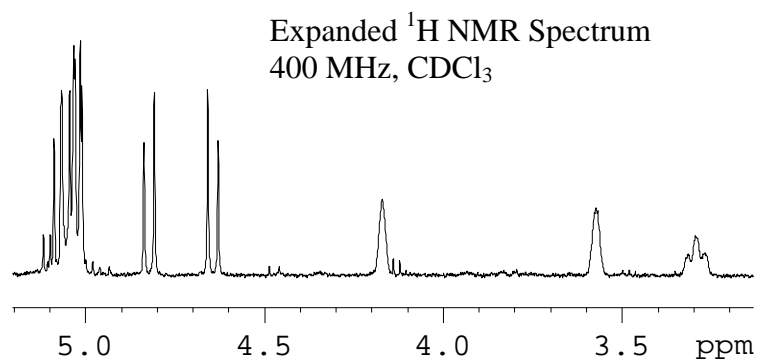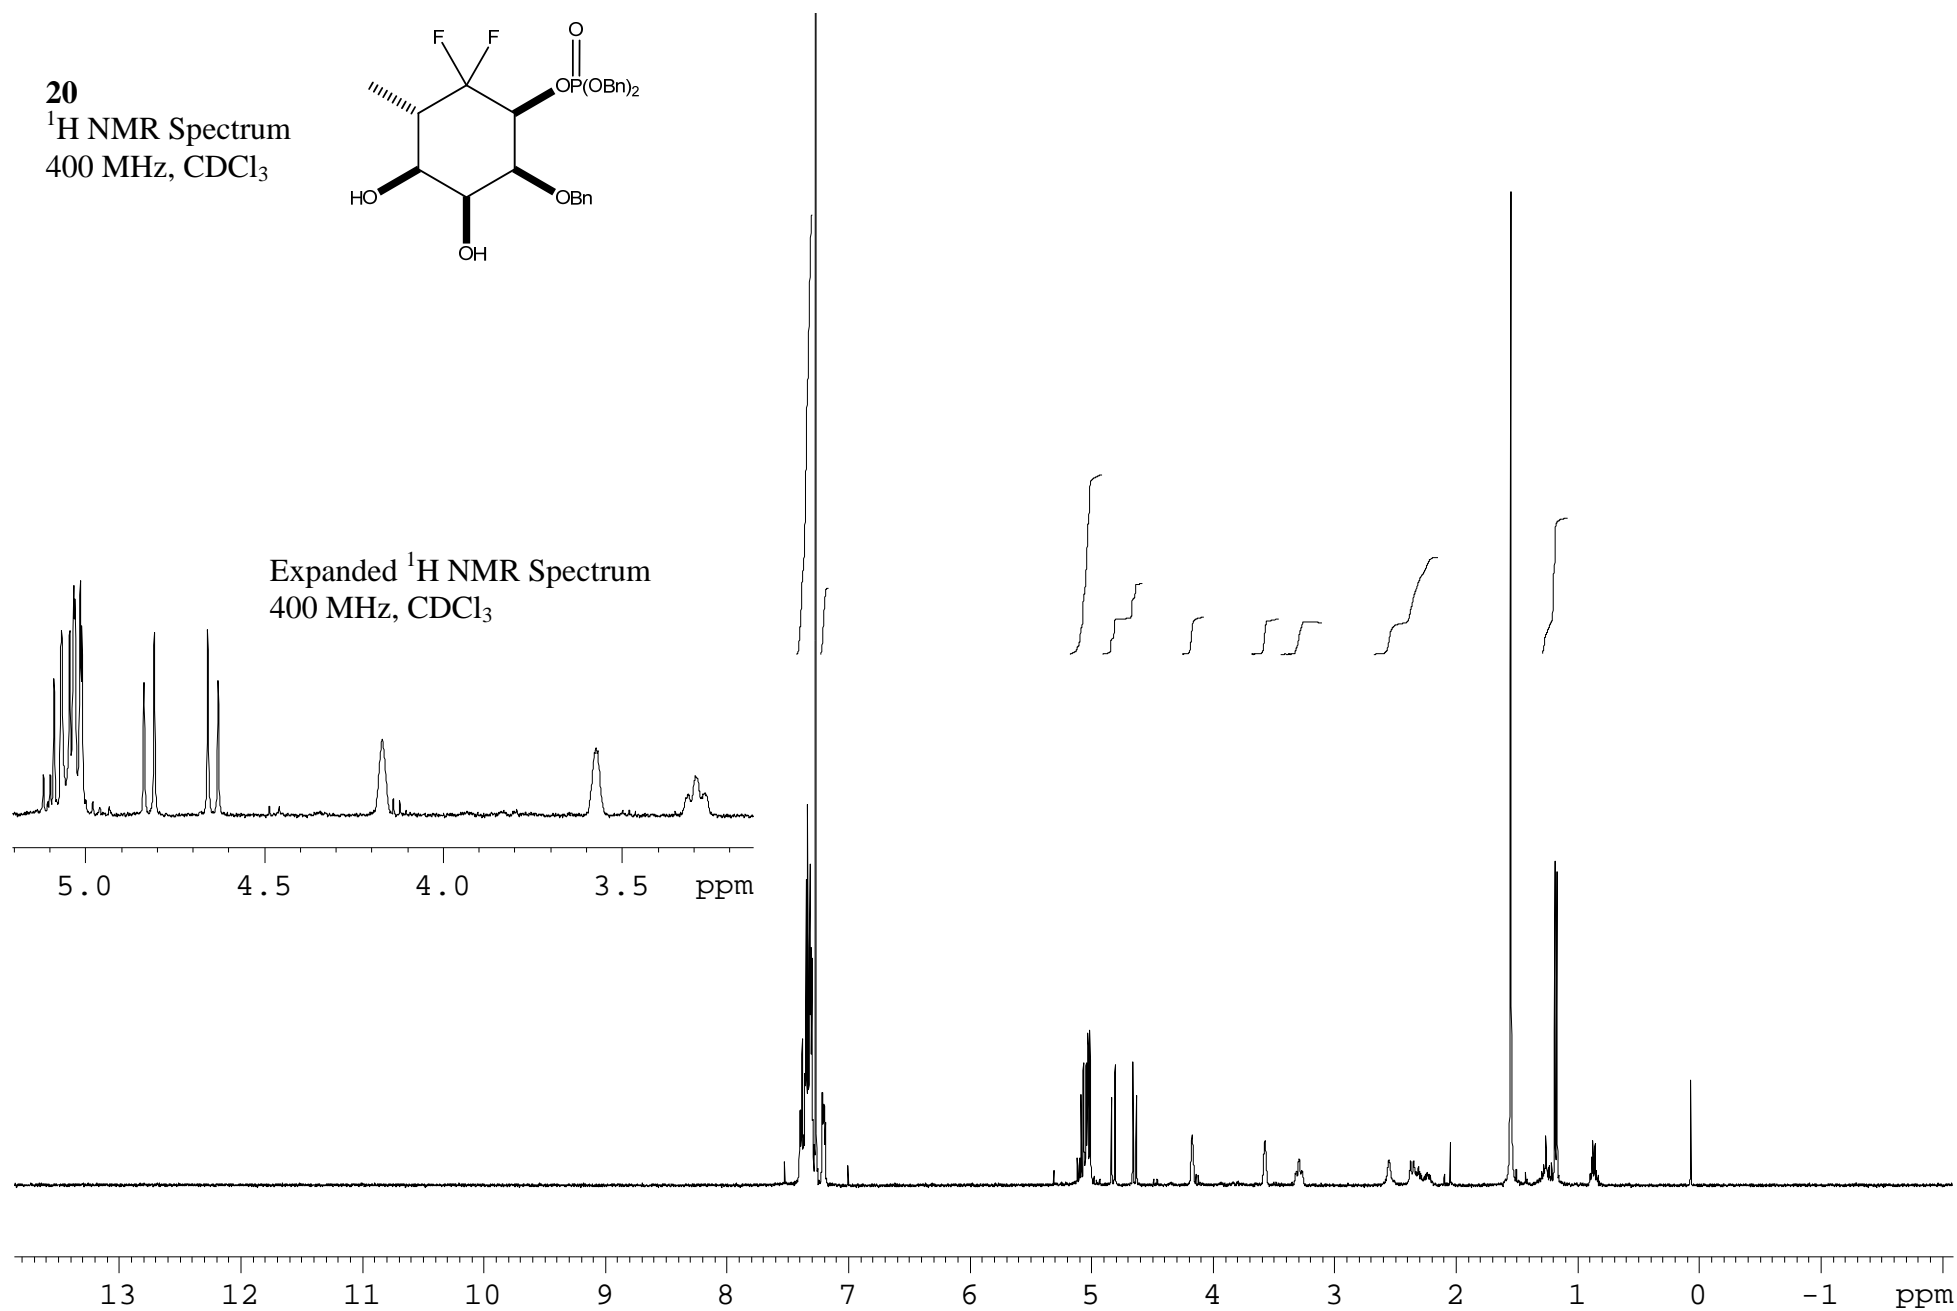



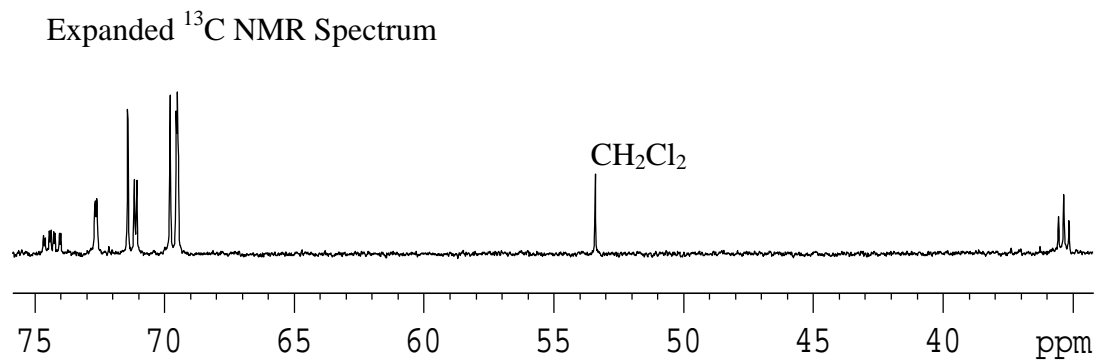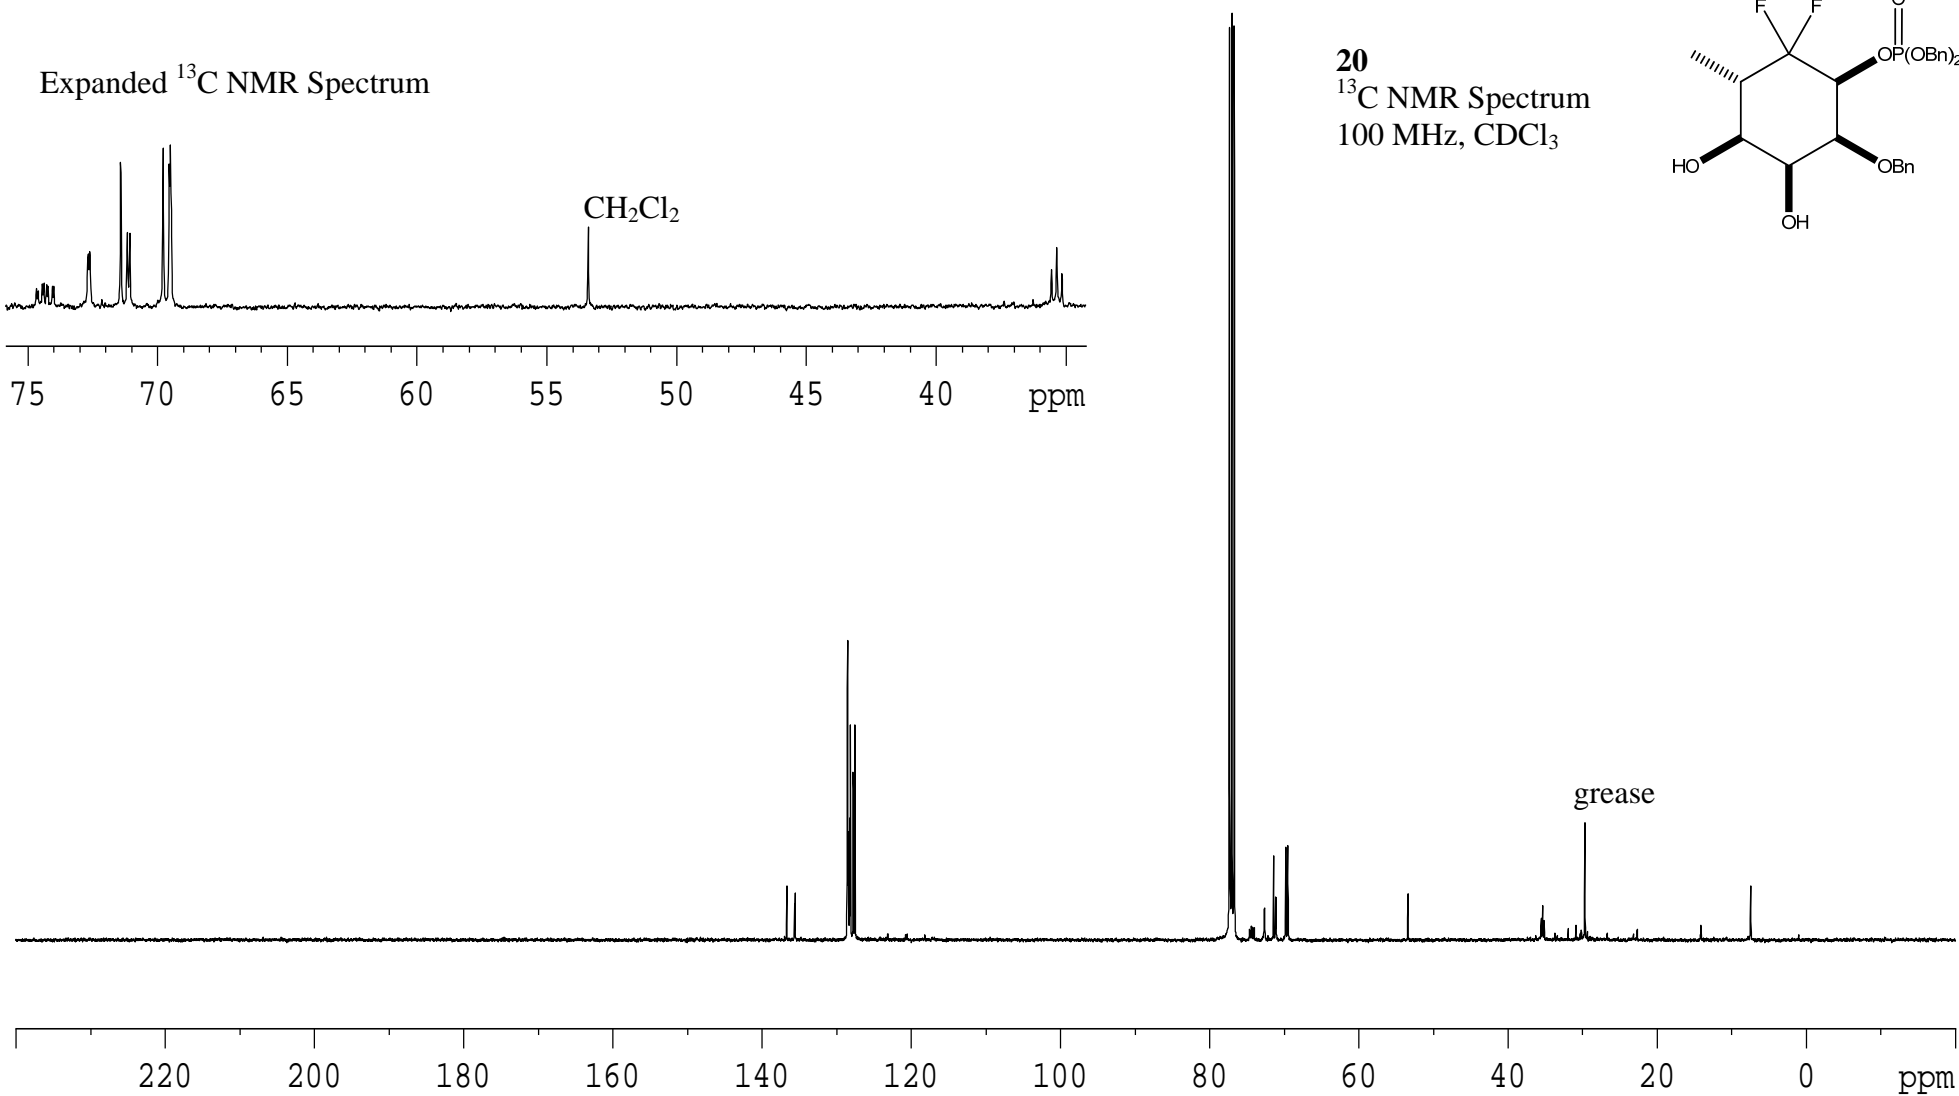

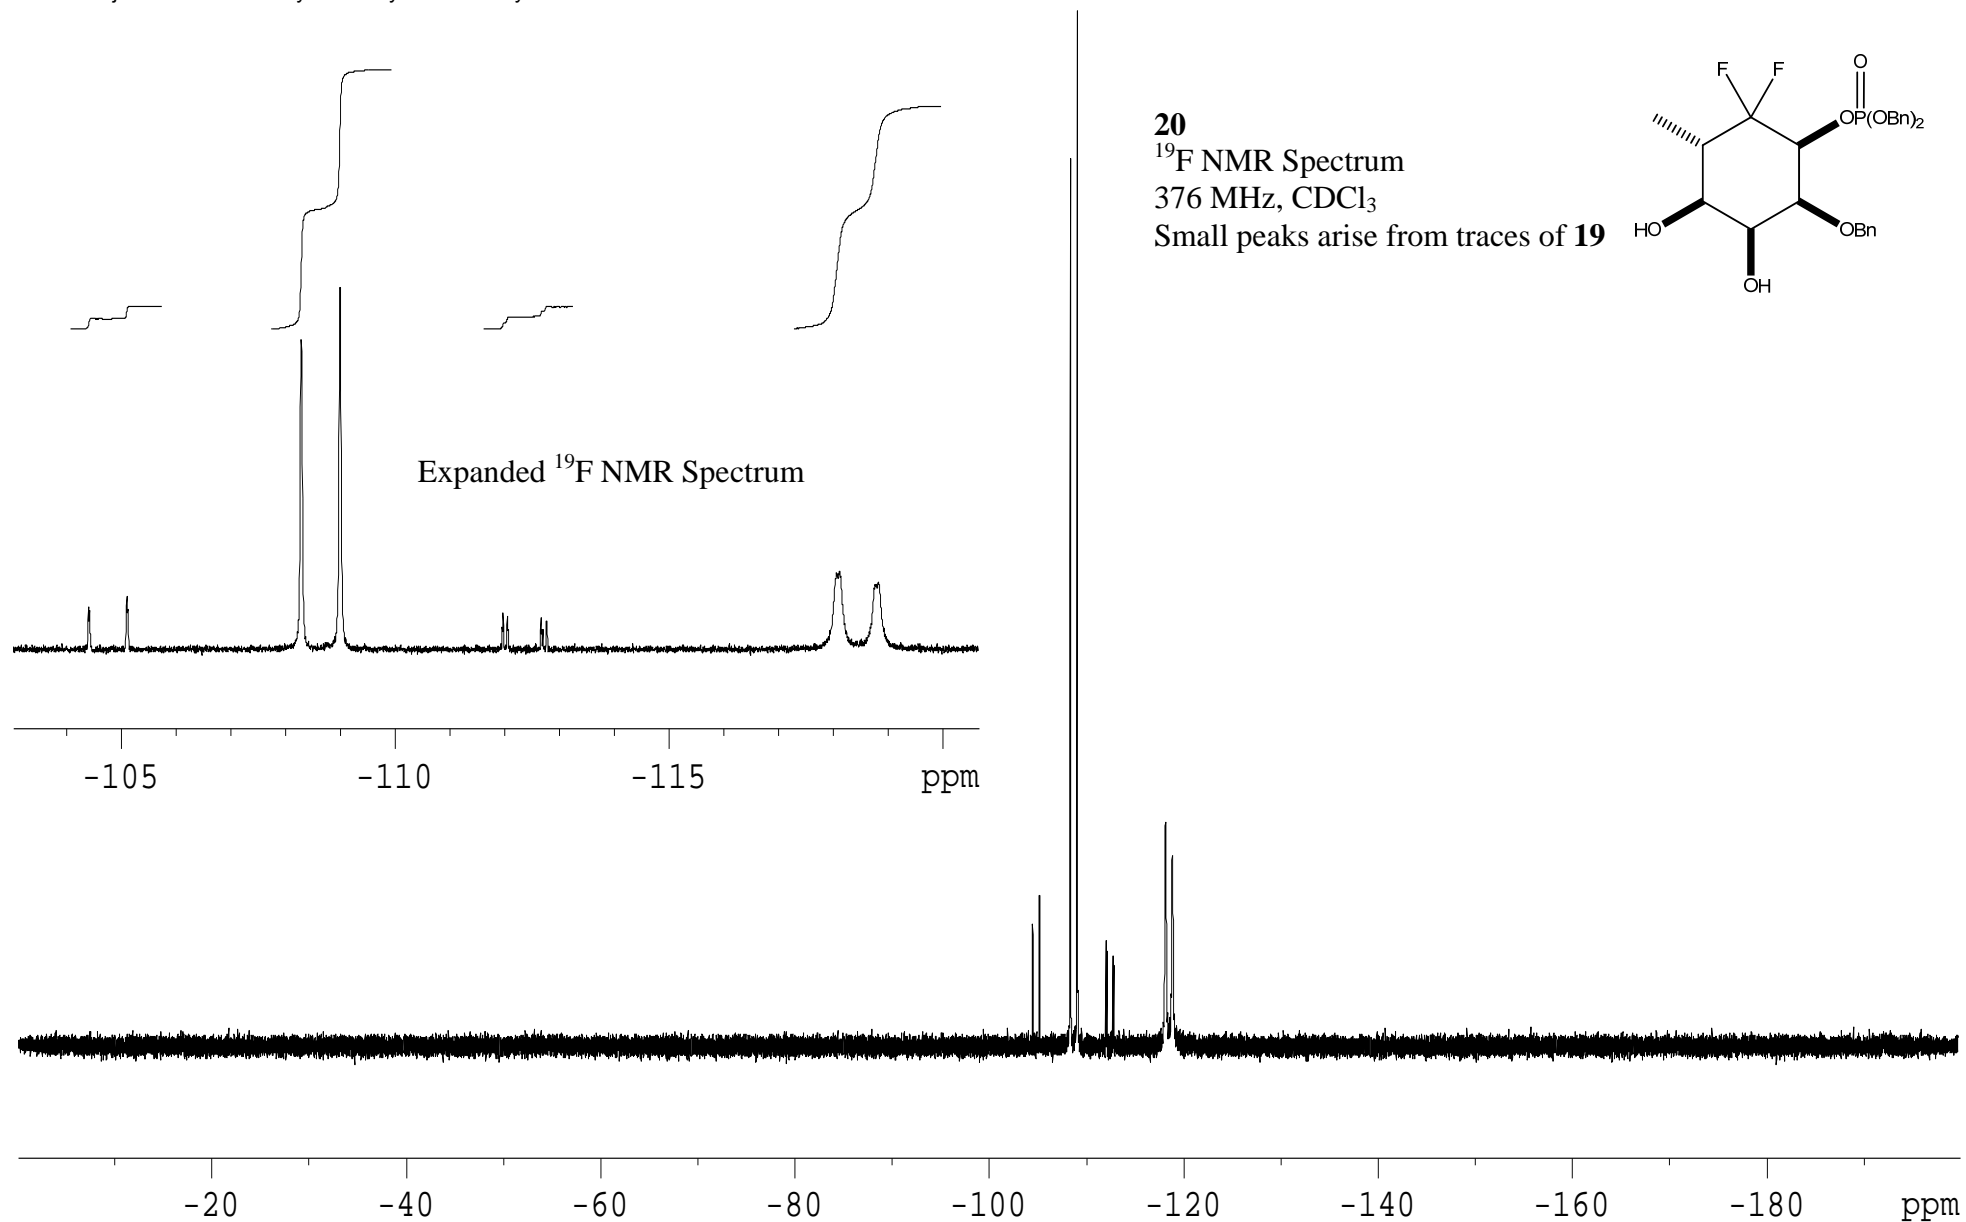

**20**  
 $^{31}\text{P}$  NMR Spectra  
161 MHz,  $\text{CDCl}_3$

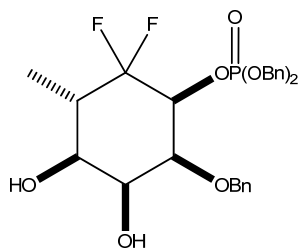

$\{^1\text{H}\}^{31}\text{P}$  NMR Spectrum

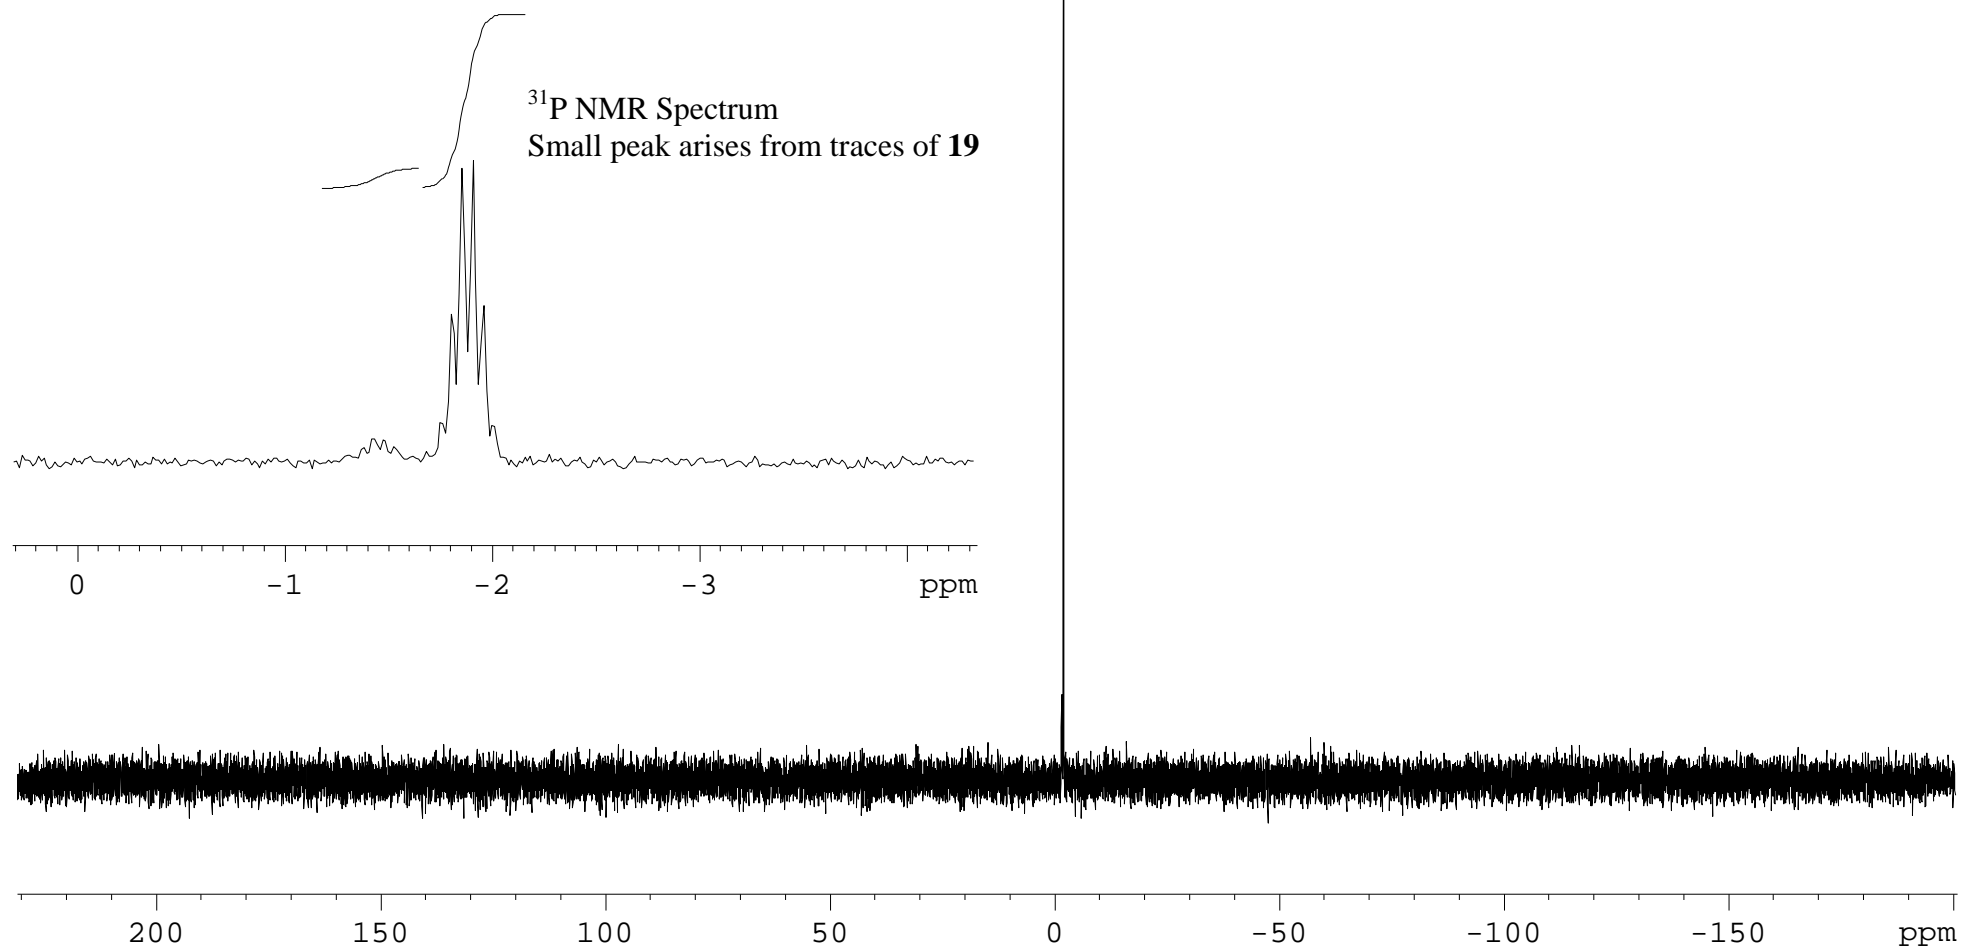

**21**  
<sup>1</sup>H NMR Spectrum  
300MHz, CDCl<sub>3</sub>

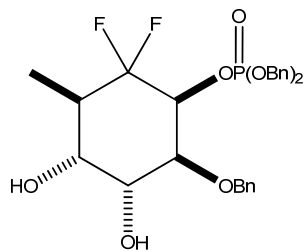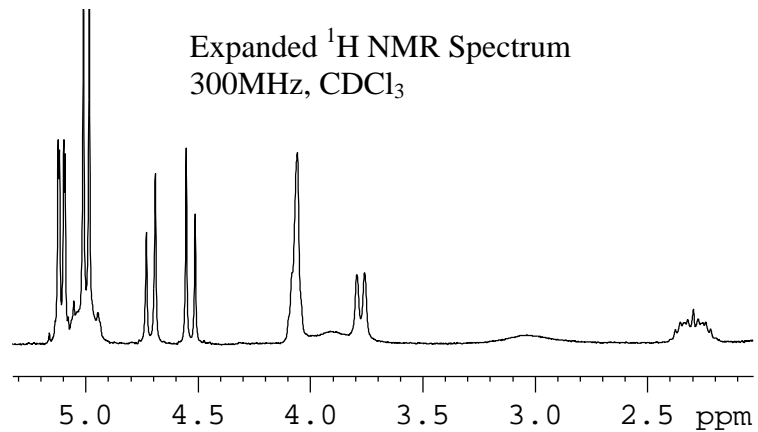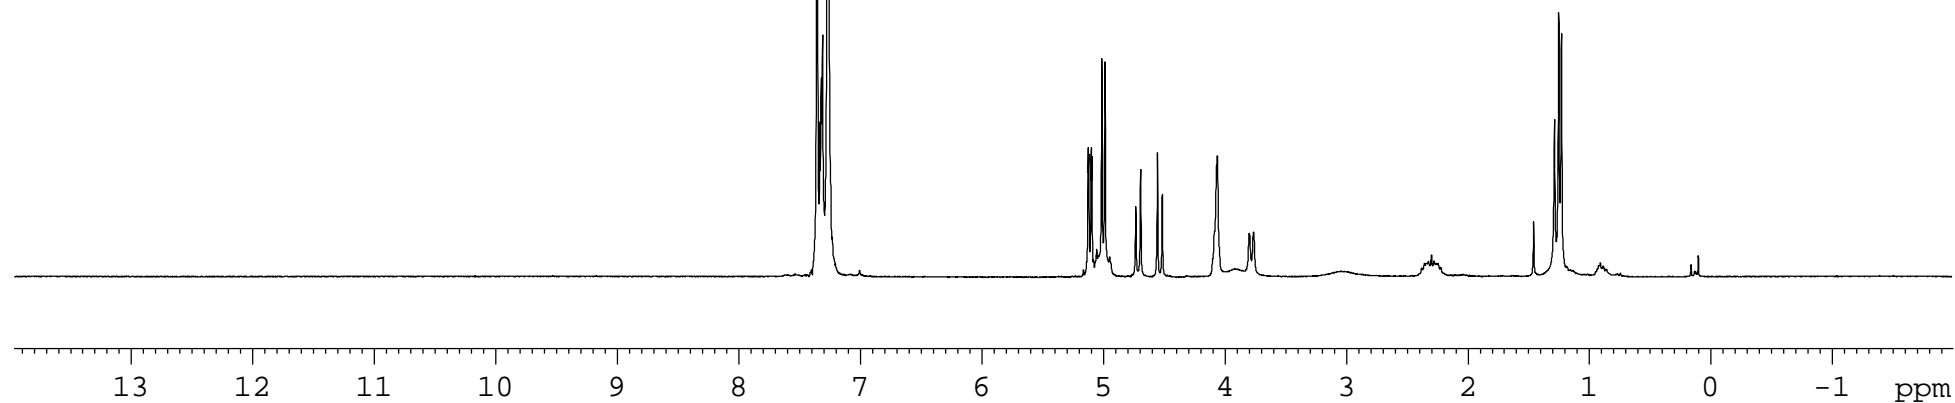

**21**  
<sup>13</sup>C NMR Spectrum  
100 MHz, CDCl<sub>3</sub>

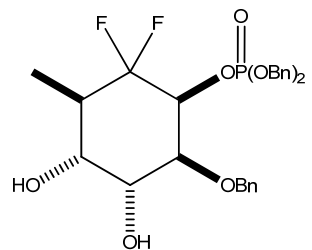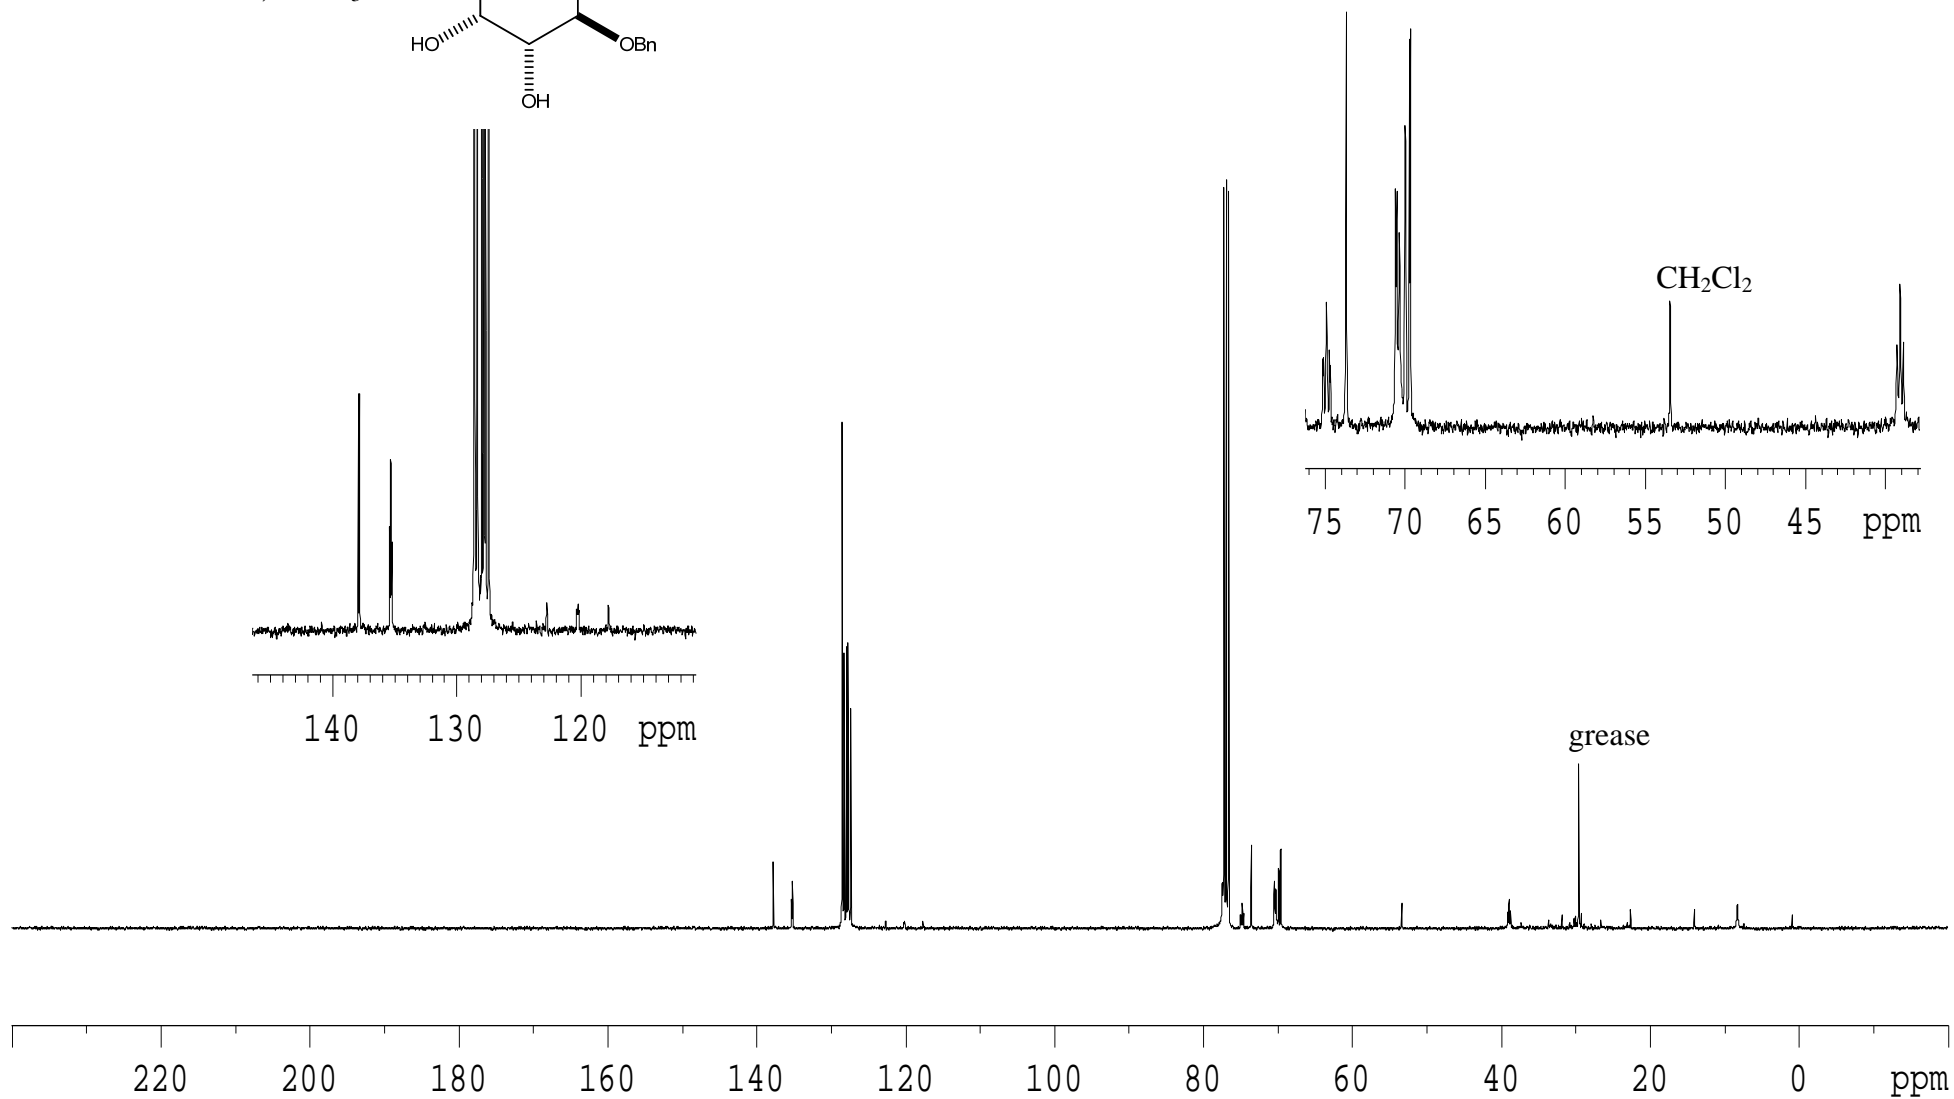

**21**  
 $^{19}\text{F}$  NMR Spectrum  
282 MHz,  $\text{CDCl}_3$

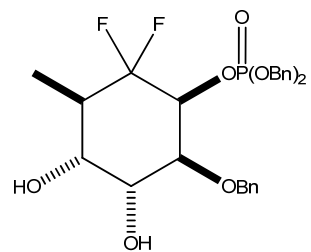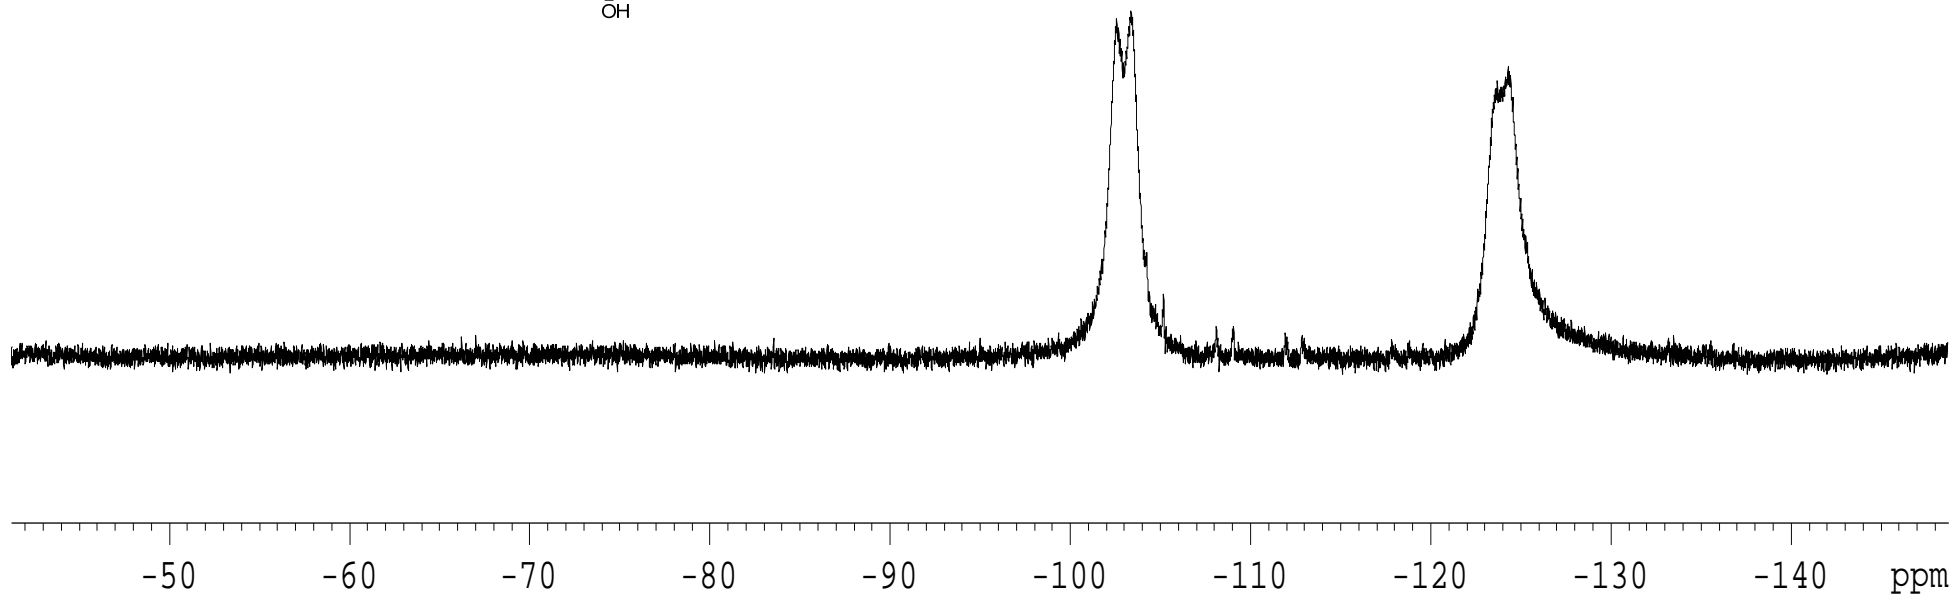



**21**  
 $^{31}\text{P}$  NMR Spectra  
121 MHz,  $\text{CDCl}_3$

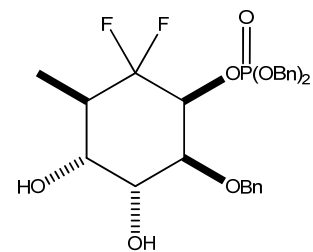

$^{31}\text{P}$  NMR Spectrum

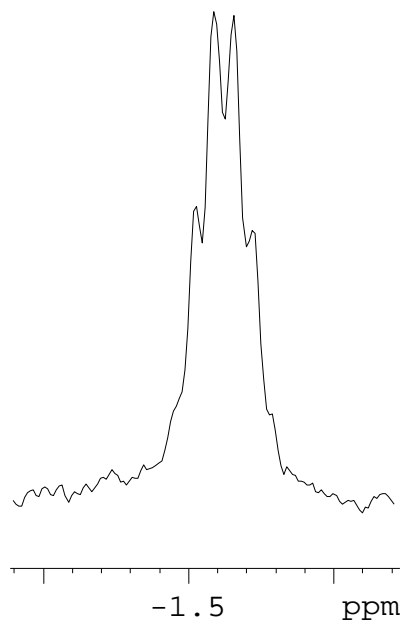

$\{^1\text{H}\}^{31}\text{P}$  NMR Spectrum

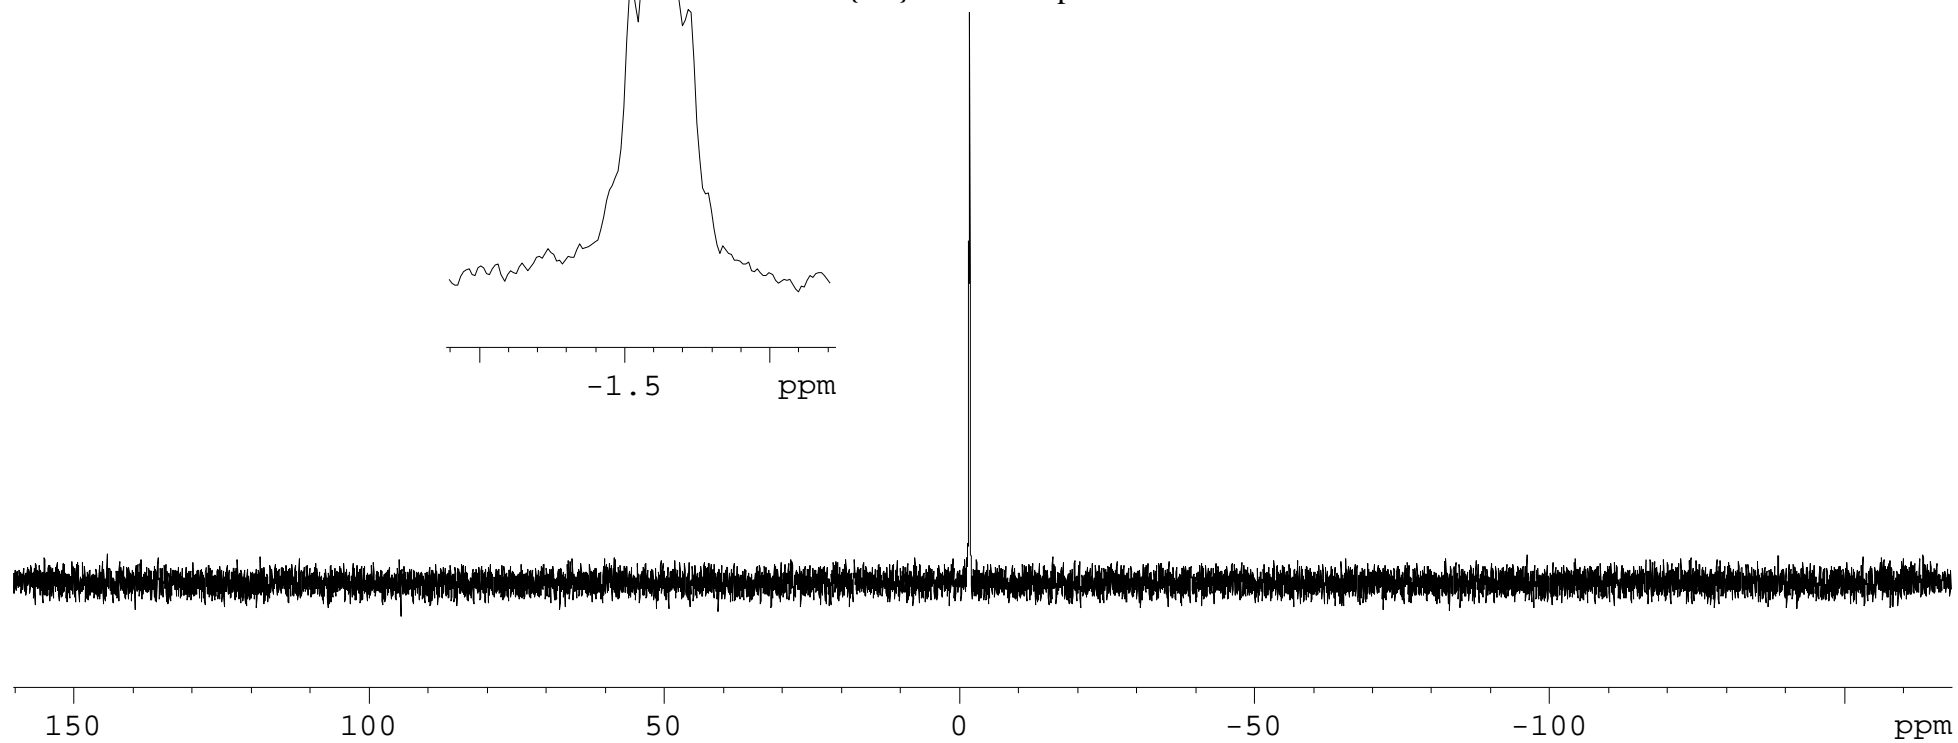

**19, 20 and 21**  
Overlay of  $^1\text{H}$  NMR spectra  
400 MHz,  $\text{CDCl}_3$

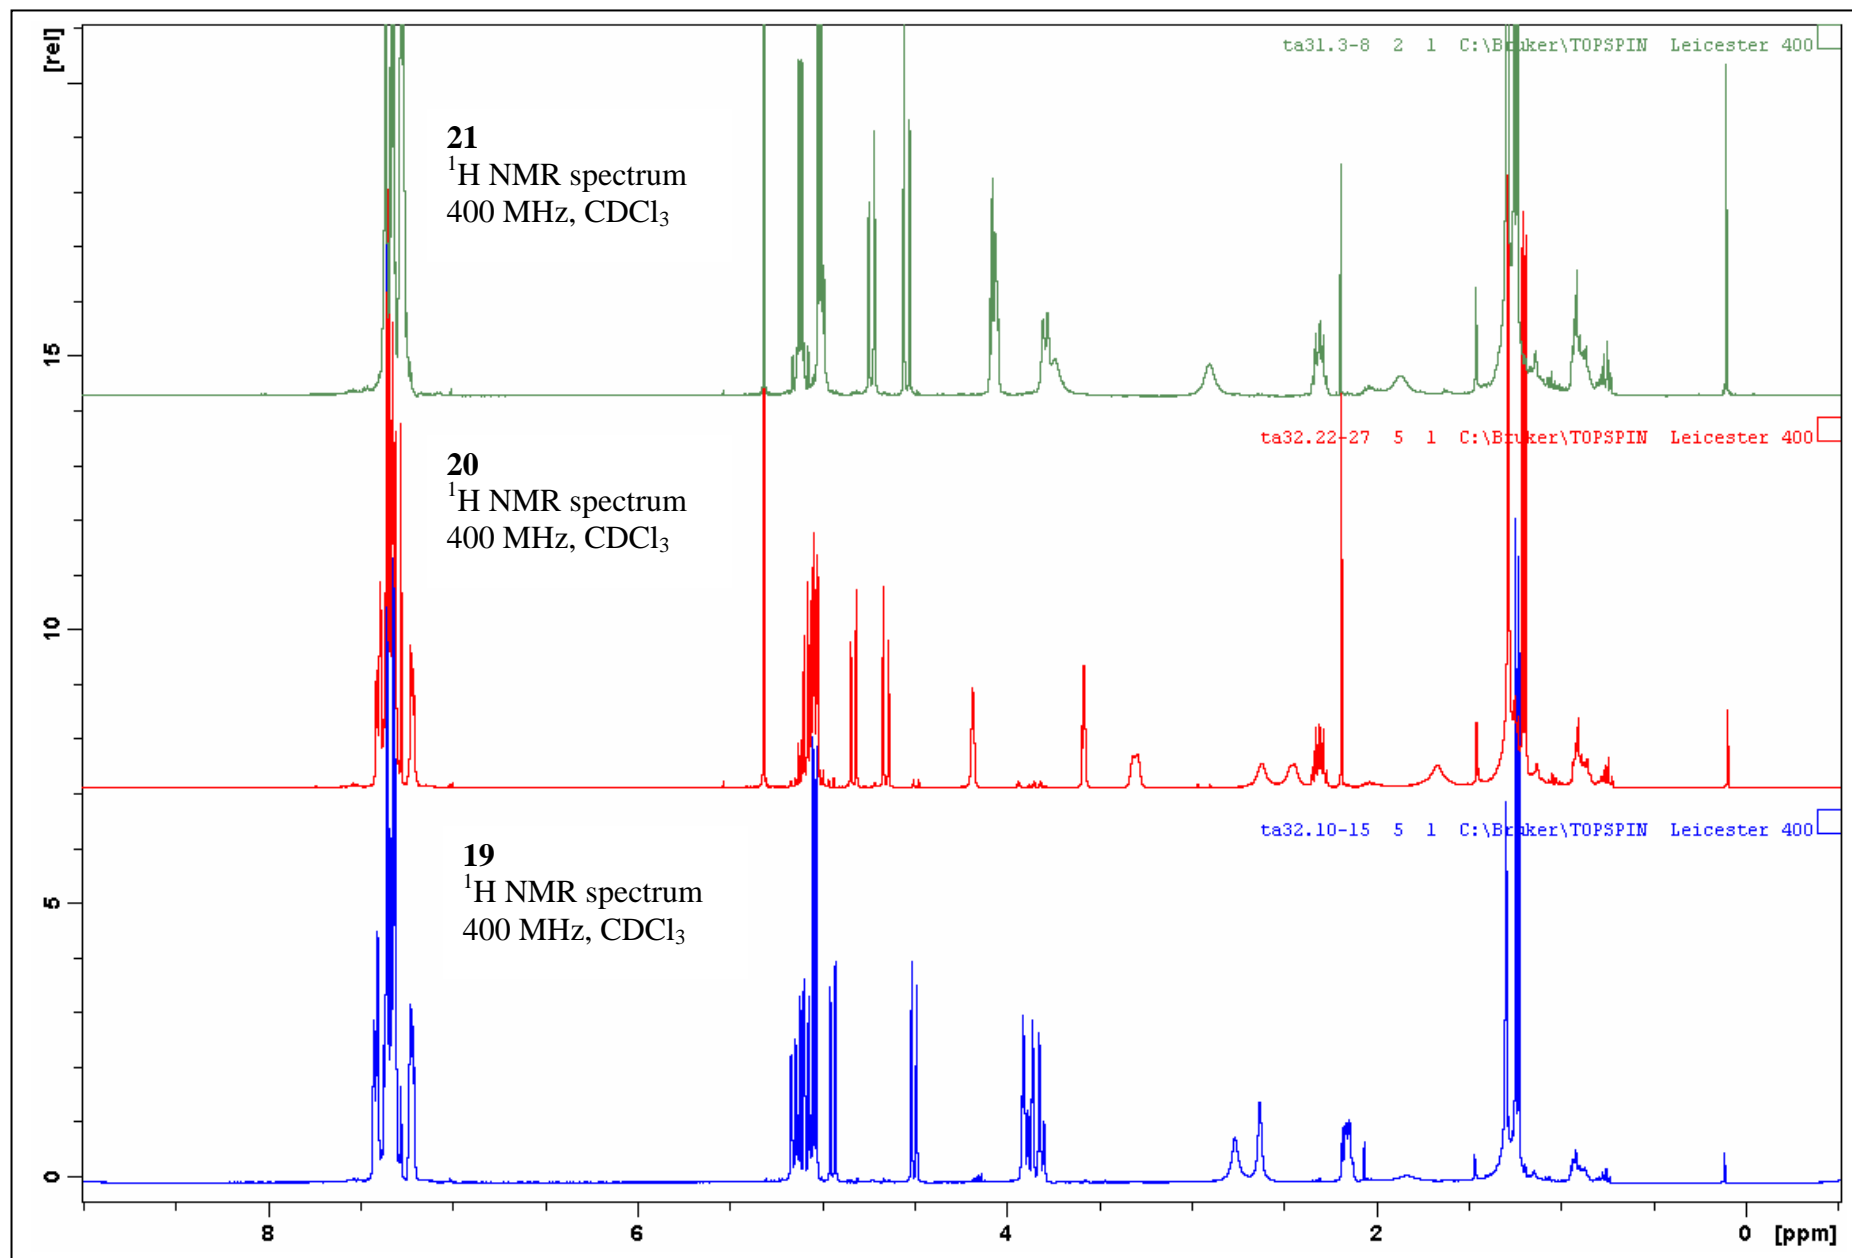

**19, 20 and 21**

Overlay of expanded  $^1\text{H}$  NMR spectra  
400 MHz,  $\text{CDCl}_3$

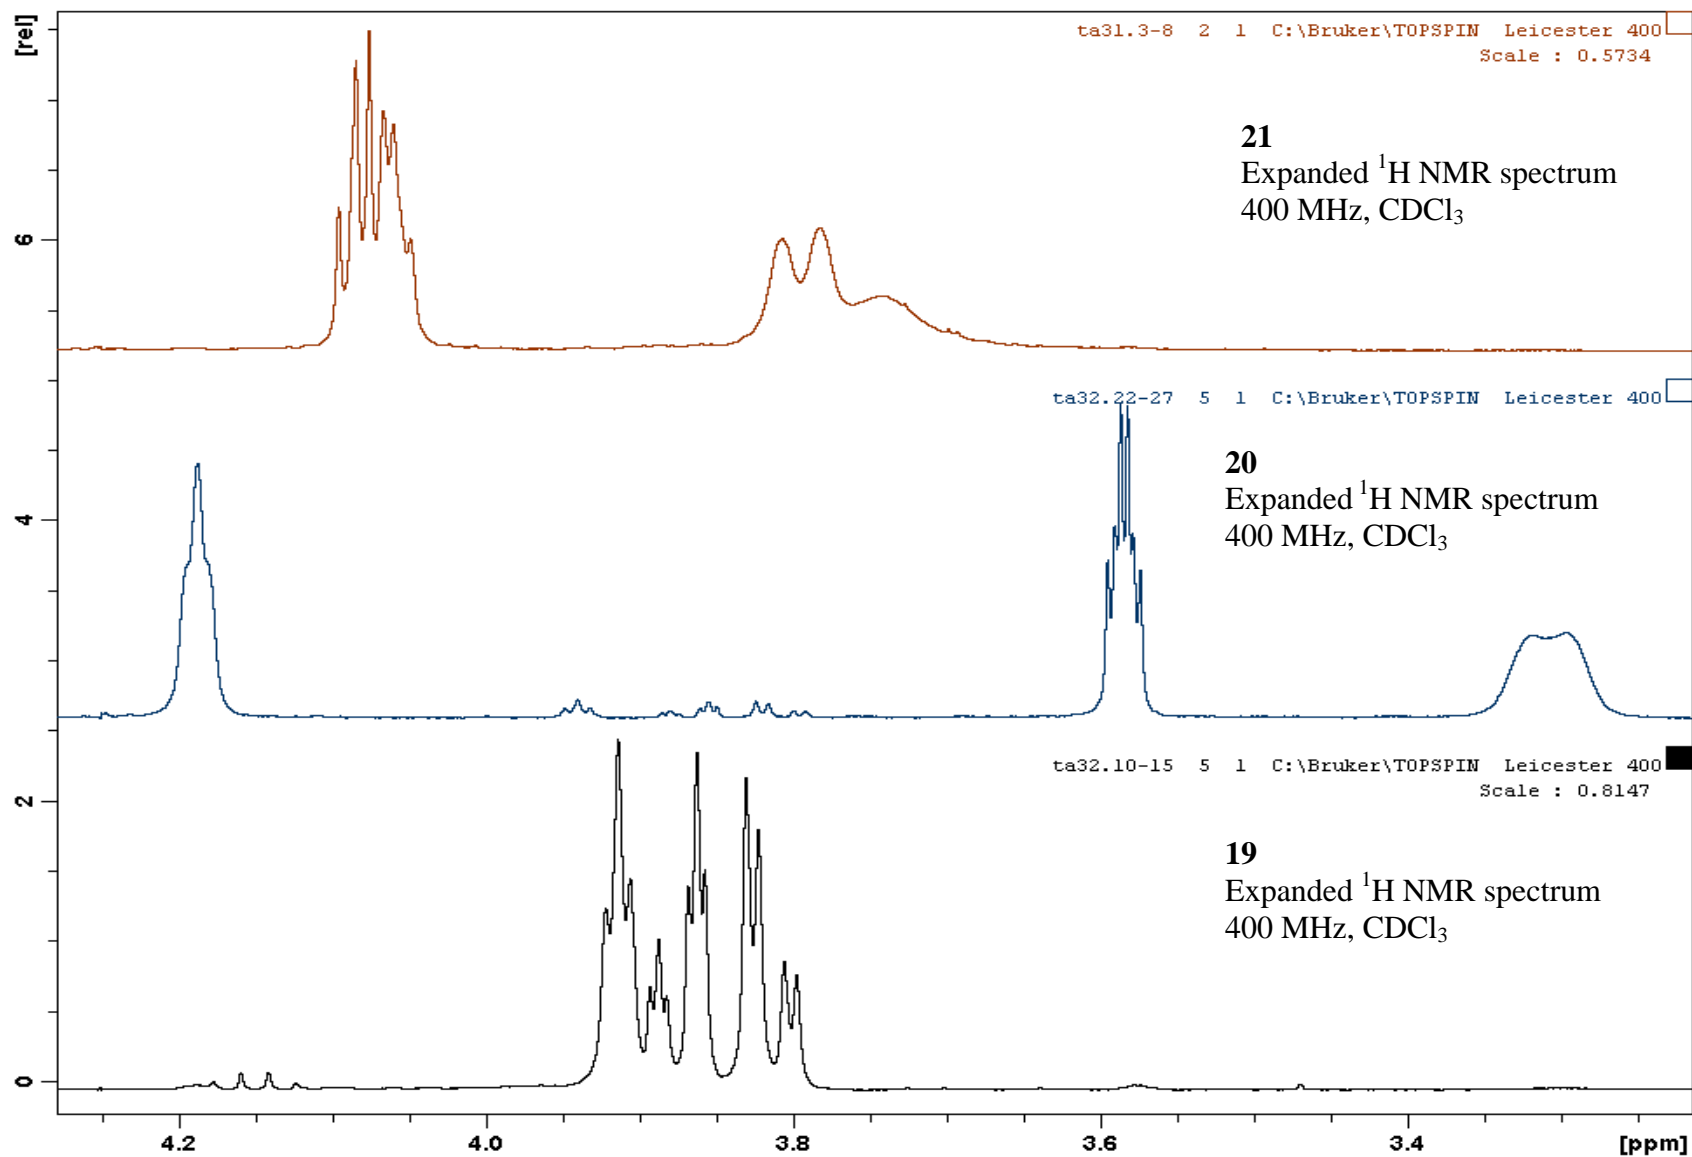

**24**  
<sup>1</sup>H NMR Spectrum  
400 MHz, D<sub>2</sub>O

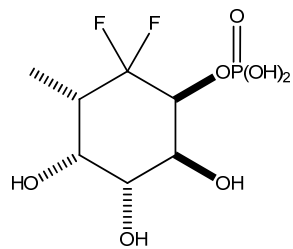

Expanded <sup>1</sup>H NMR Spectrum

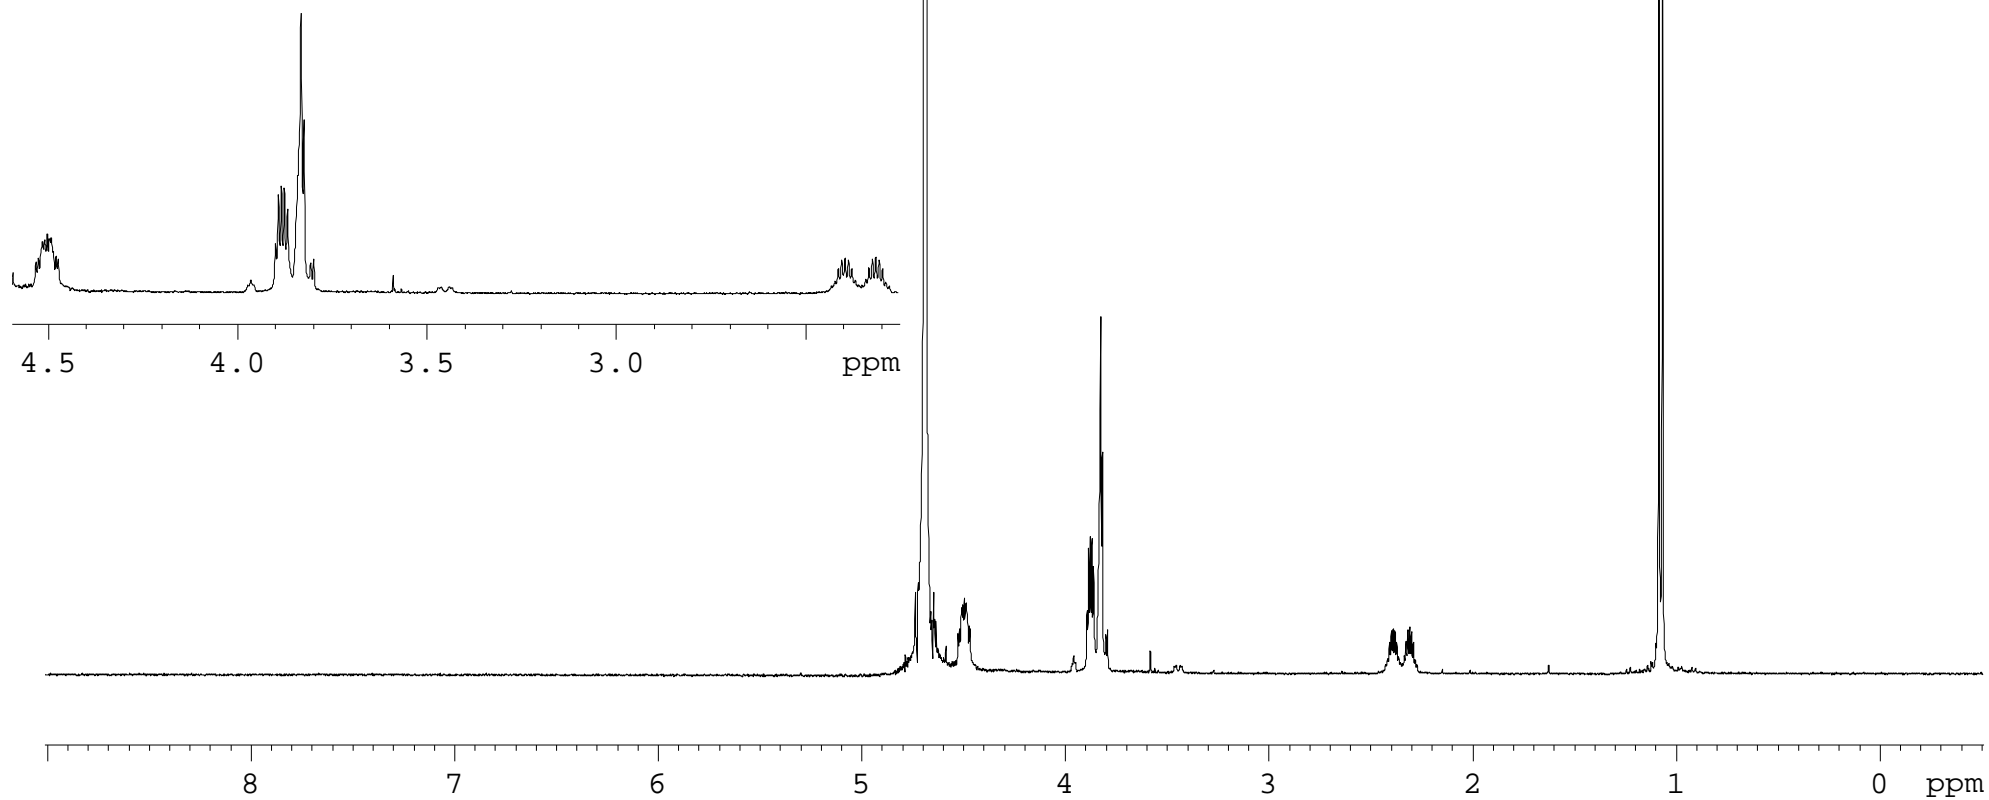

**24**  
<sup>13</sup>C NMR Spectrum  
100 MHz, D<sub>2</sub>O

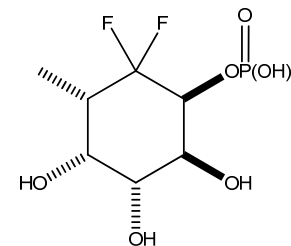

Expanded <sup>13</sup>C NMR Spectrum

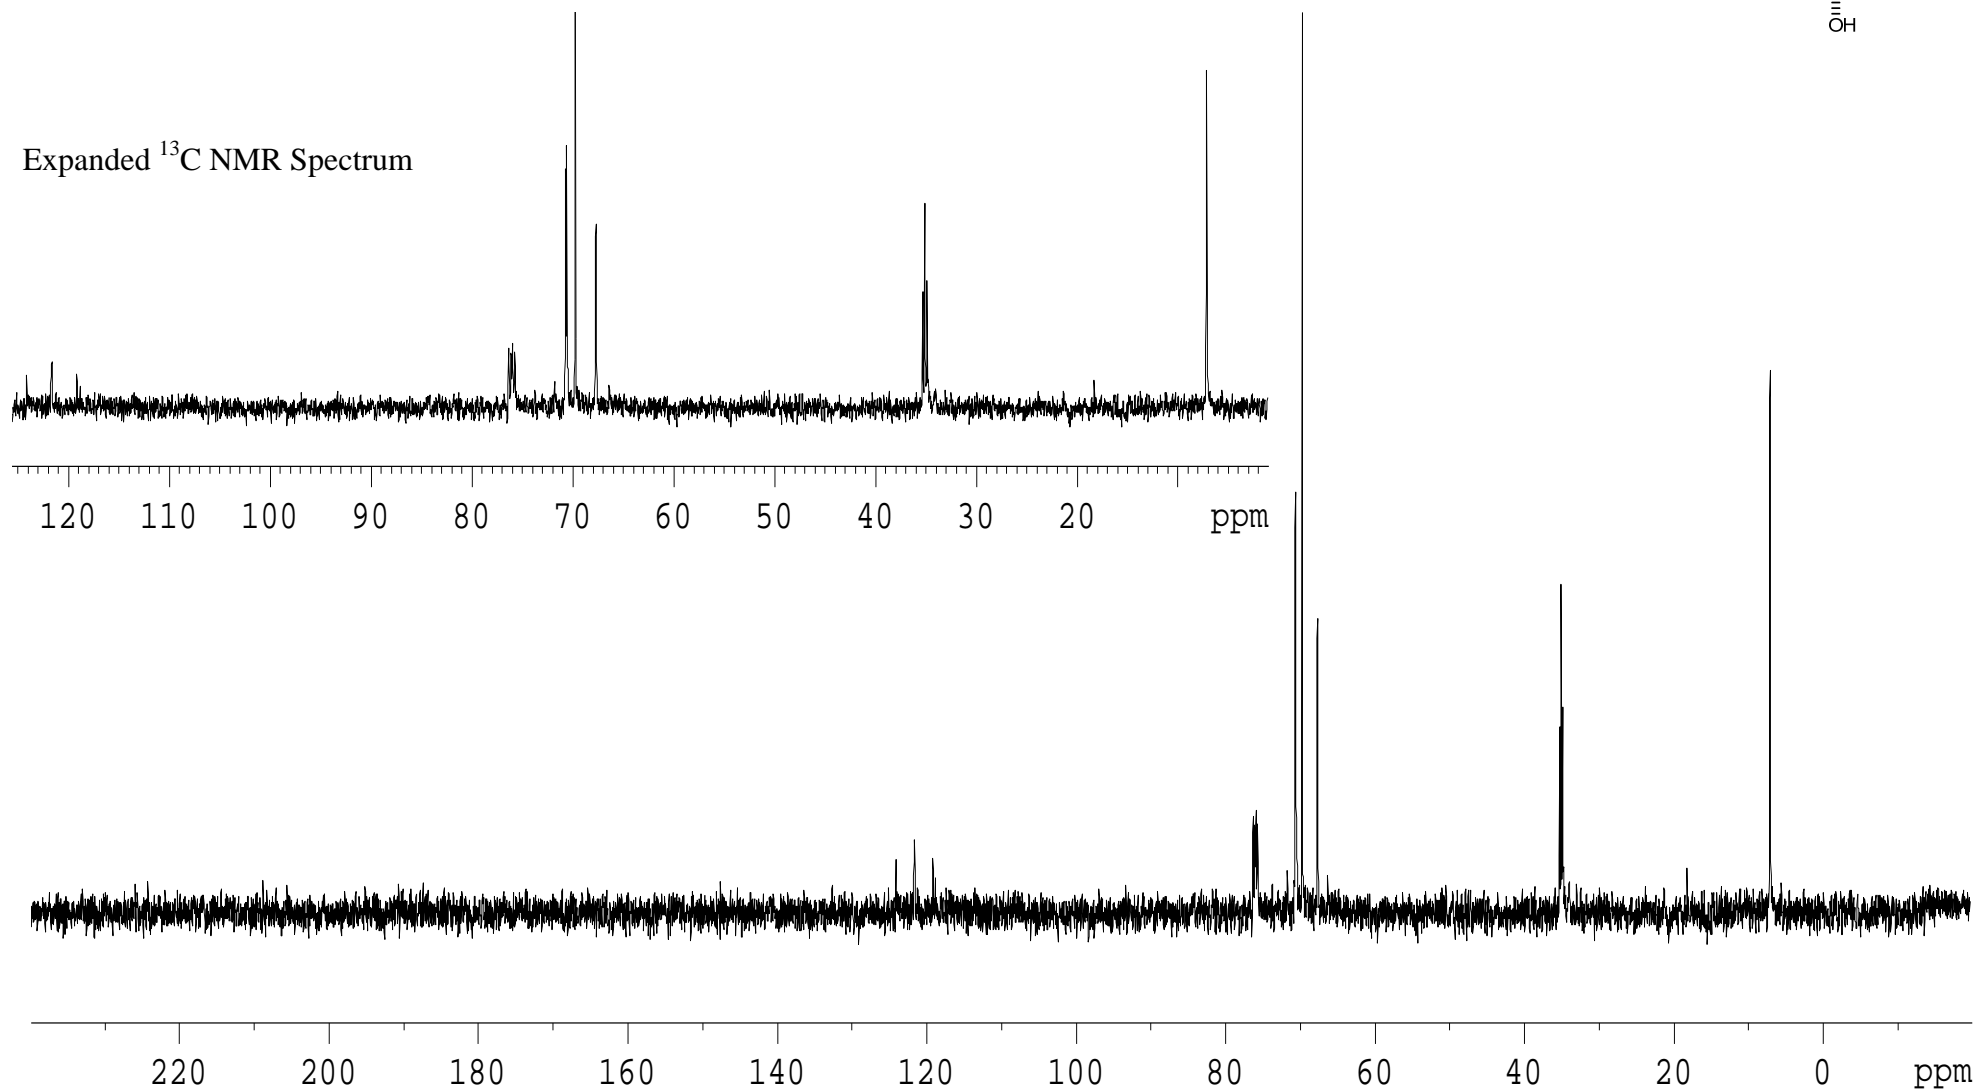

24  
<sup>19</sup>F NMR Spectrum  
376 MHz, D<sub>2</sub>O

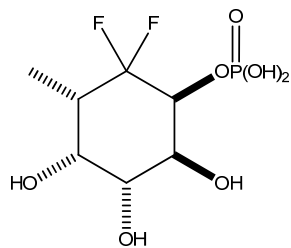

Expanded <sup>19</sup>F NMR Spectrum

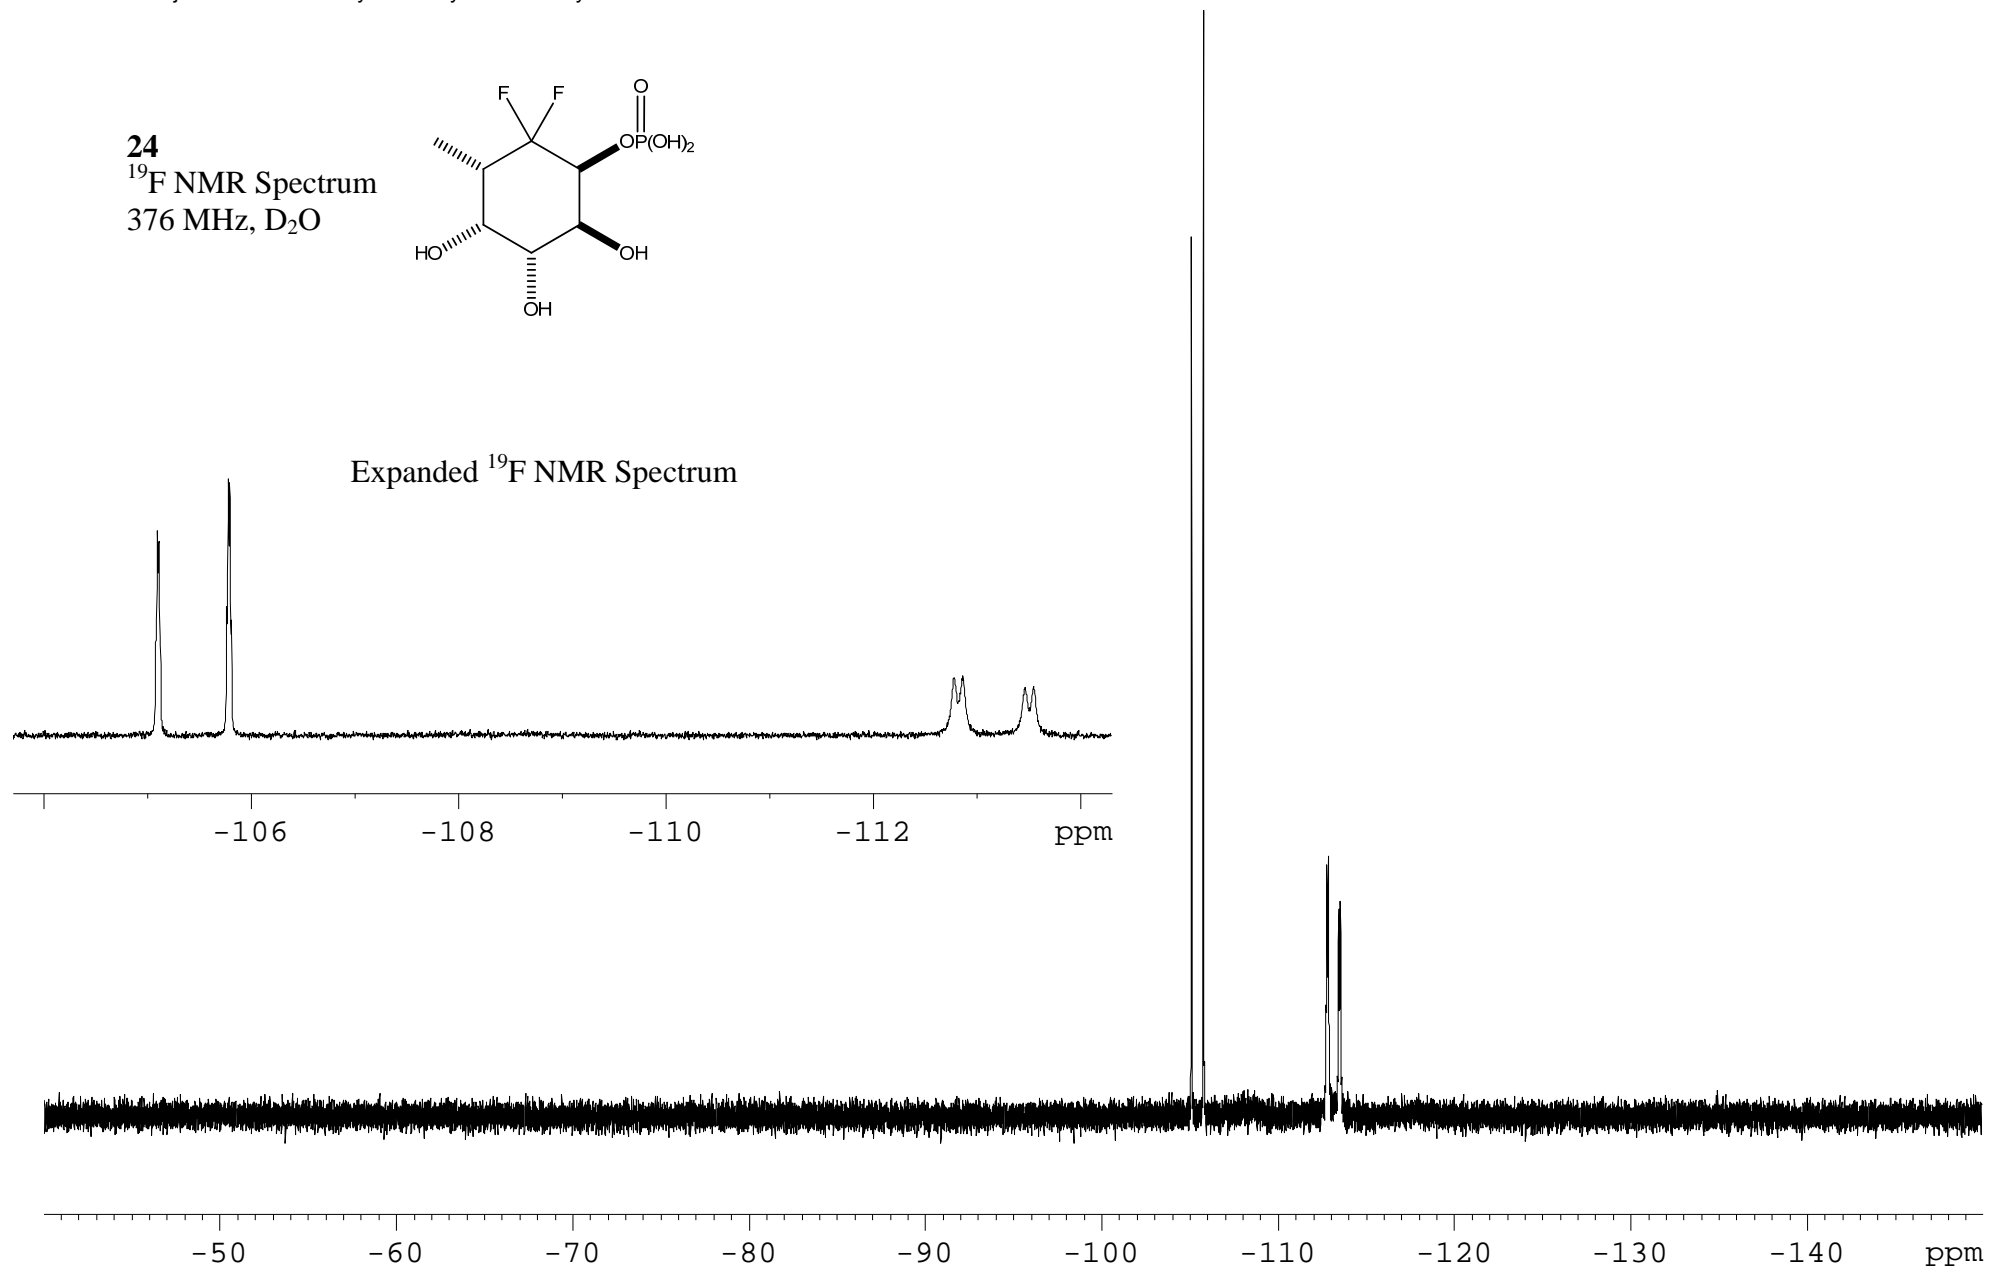

**24**  
<sup>31</sup>P NMR Spectra  
121 MHz, D<sub>2</sub>O

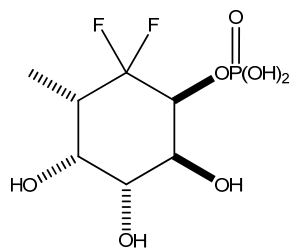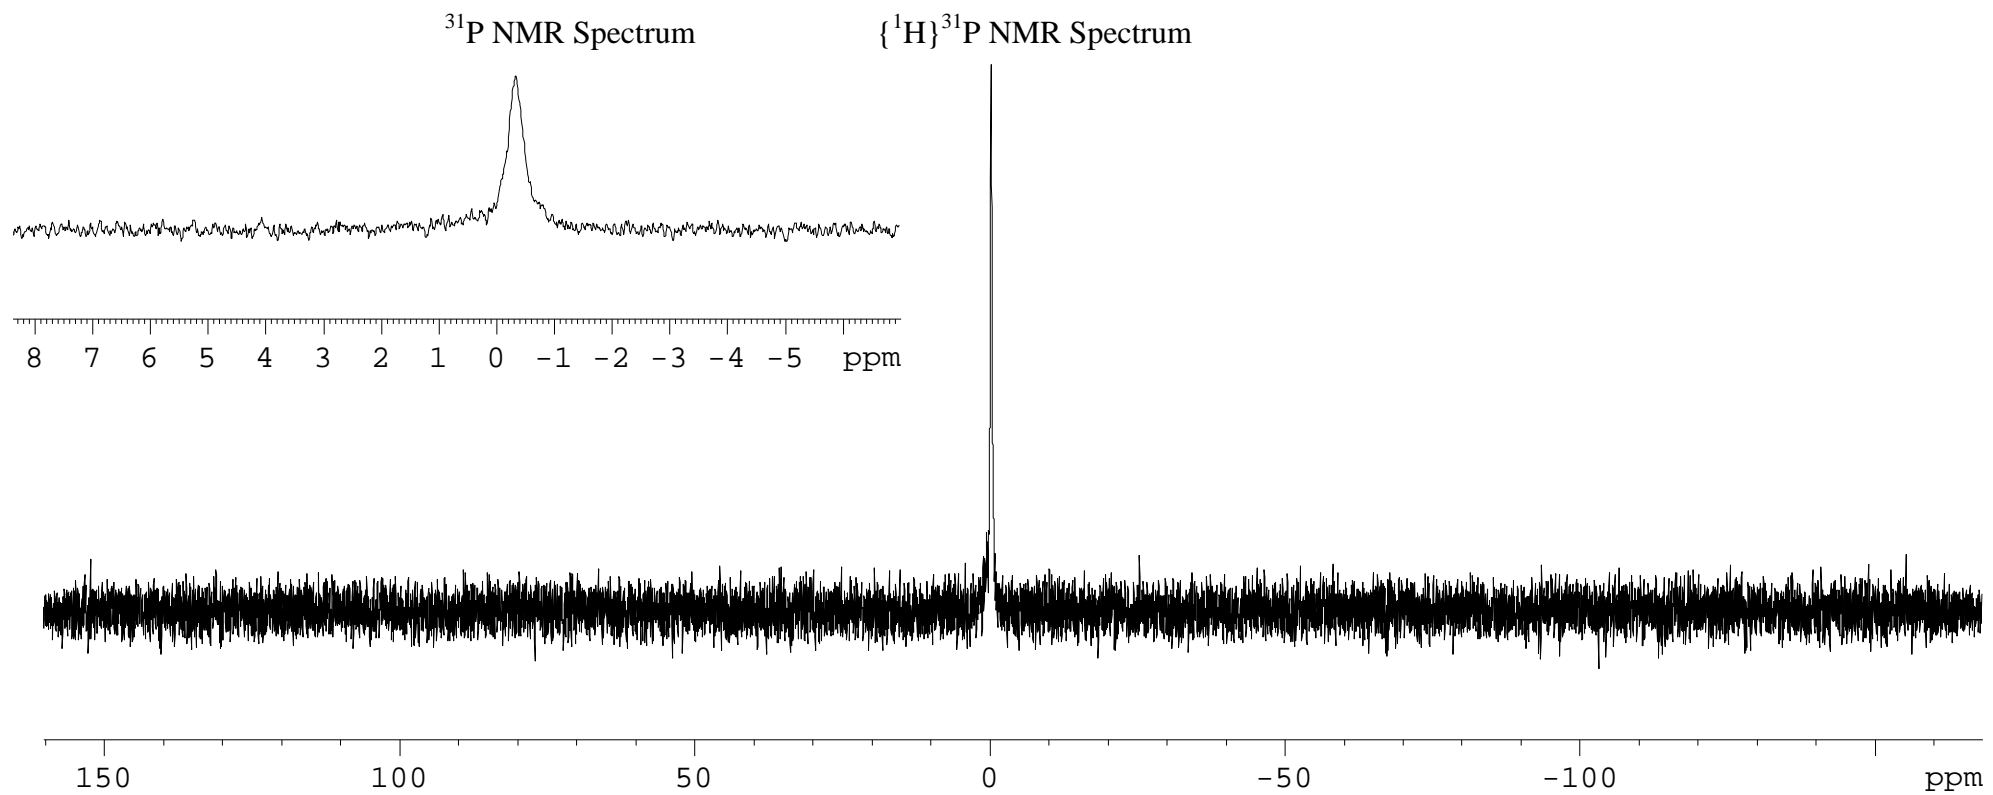

**25**  
<sup>1</sup>H NMR Spectrum  
400 MHz, D<sub>2</sub>O

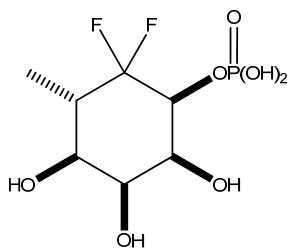



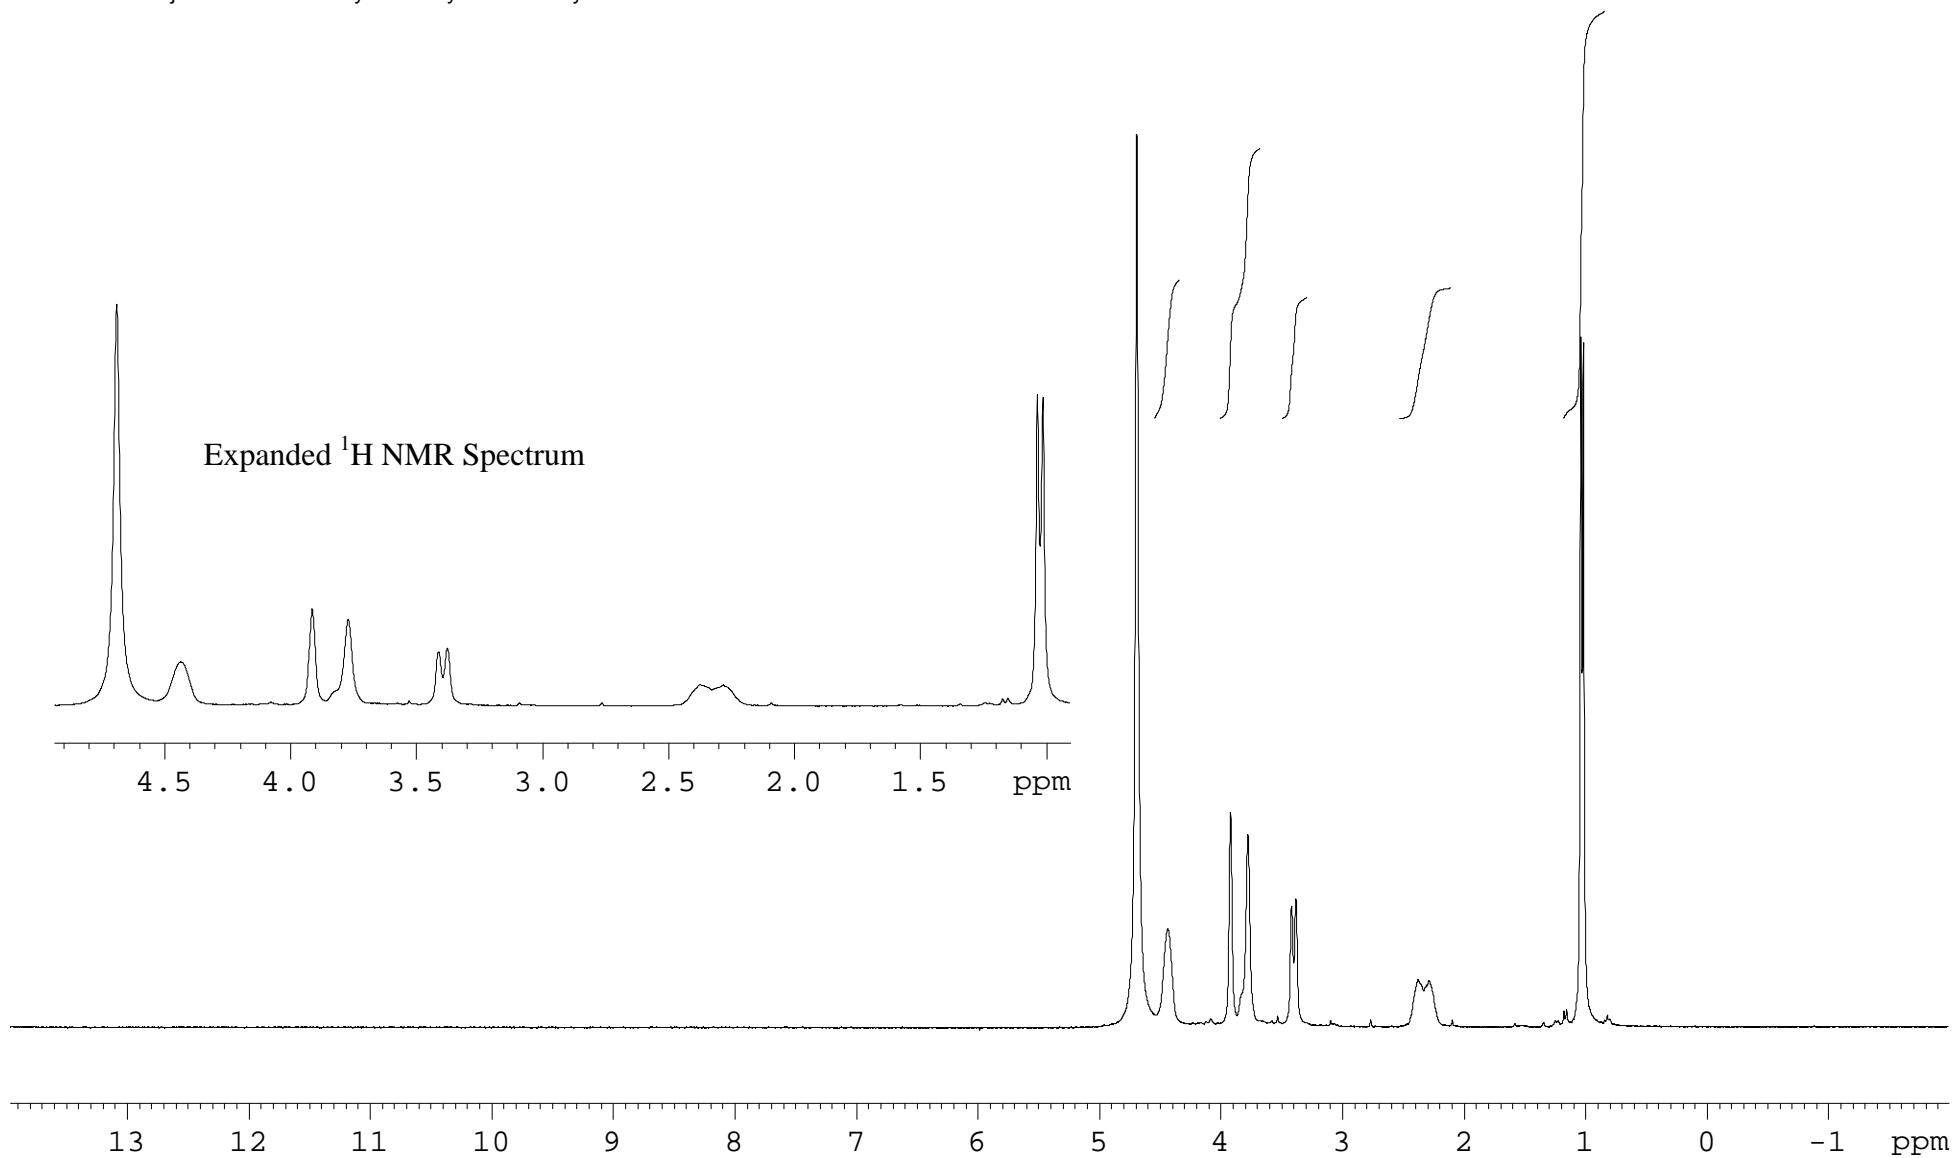

**25**  
<sup>13</sup>C NMR Spectrum  
100 MHz, D<sub>2</sub>O

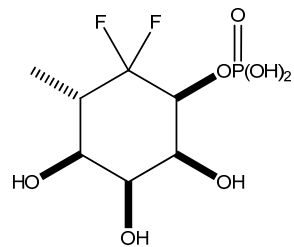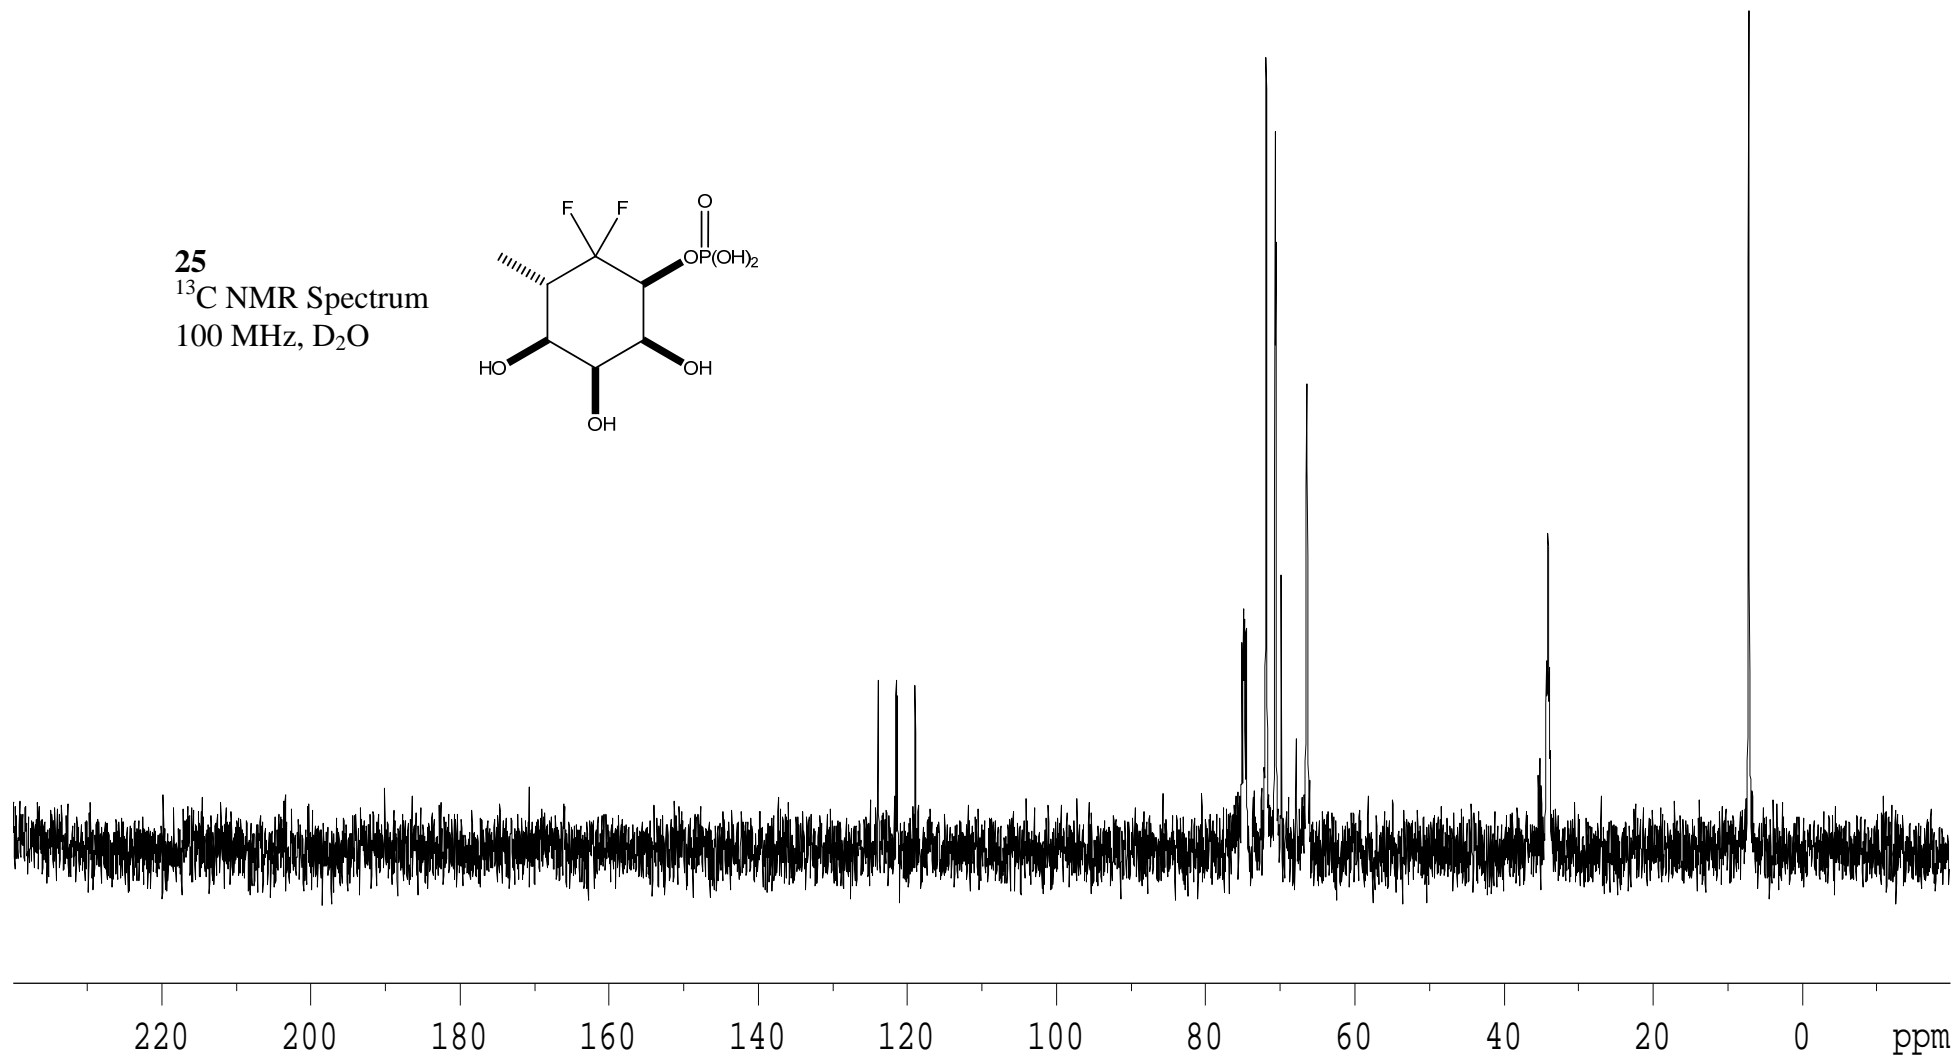

**25**  
<sup>19</sup>F NMR Spectrum  
282 MHz, D<sub>2</sub>O  
Small peaks arise from traces of **24**

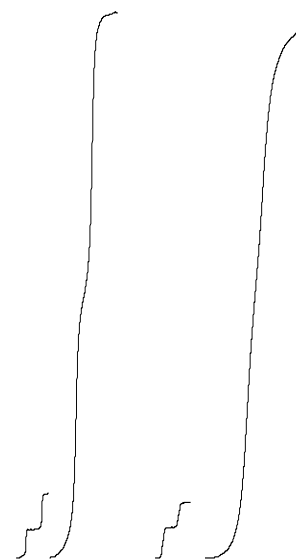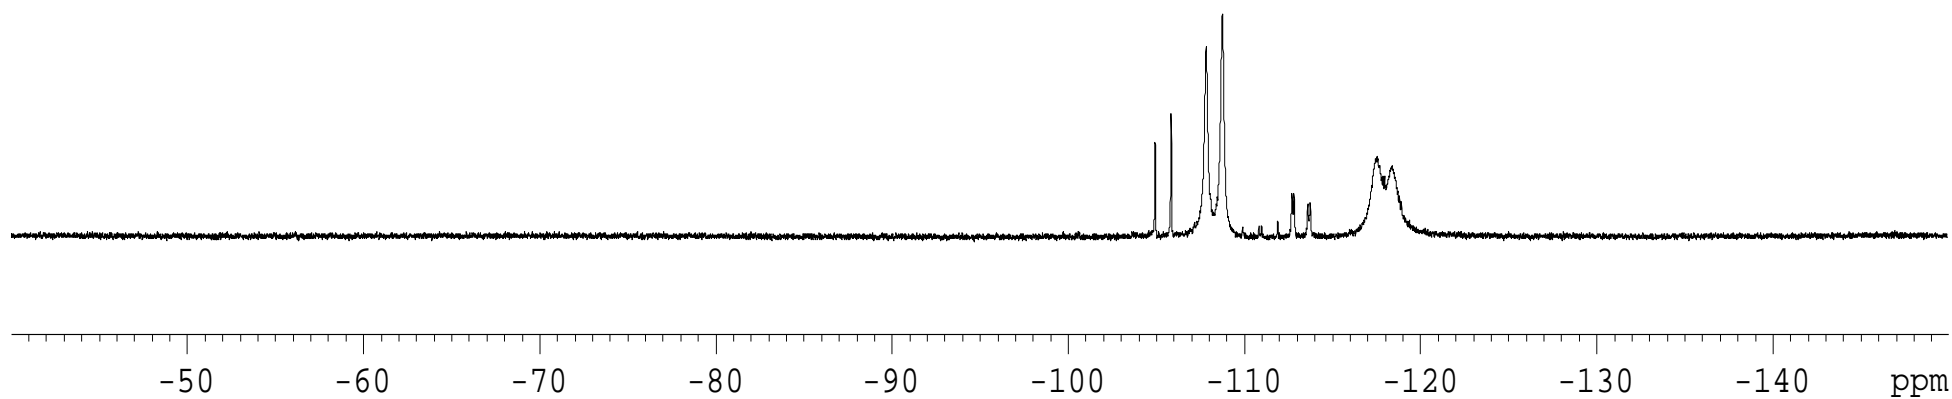

25  
 $^{31}\text{P}$  NMR Spectra  
121 MHz,  $\text{D}_2\text{O}$

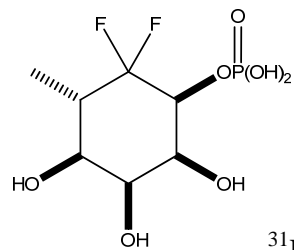

$^{31}\text{P}$  NMR Spectrum

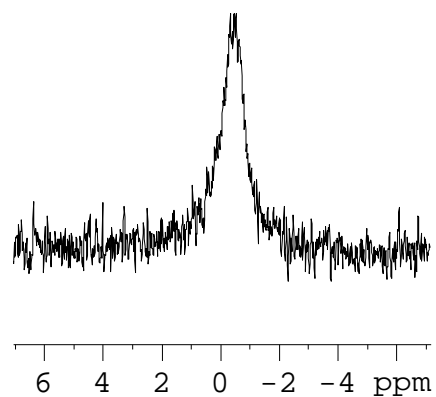

$\{^1\text{H}\}^{31}\text{P}$  NMR  
Spectrum

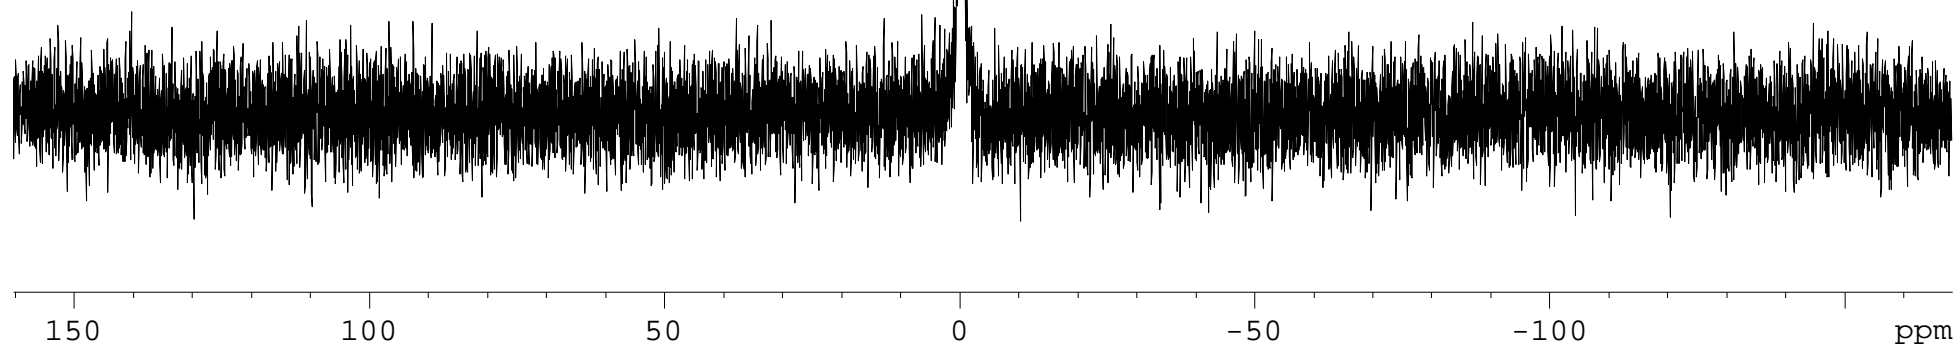

Supplement: b914068a.pdf [file b914068a.pdf]
